# Supplementary material
Source: publisher figshare collection journal article supplement (https://gsajournals.figshare.com/ndownloader/files/21211542)
Supplement: Supplementary file 1 [file 21211542]

## Sheet: Sheet1
Ortholog ID	aegypti protein ID	aegypti protein description	aegypti gene	aegypti query evalue	aegypti query score	albopictus protein ID	albopictus protein description	albopictus gene	albopictus query evalue	albopictus query score
ort000001	XP_021712658.1	uncharacterized LOC5567174	gene19227	4e-47	159	XP_019524834.1	box A-binding factor-like	gene29173	1e-47	160
ort000002	XP_001651668.2	uncharacterized LOC5567238	gene16598	0	825	XP_019524836.1	uncharacterized LOC109396981	gene29182	0	839
ort000003	XP_001662950.2	RPII140-upstream gene protein	gene3460	0	502	XP_019524837.1	RPII140-upstream gene protein-like	gene3275	0	502
ort000004	XP_021710893.1	IQ motif and SEC7 domain-containing protein 1%2C transcript variant X10	gene16586	0	1750	XP_019524840.1	IQ motif and SEC7 domain-containing protein 1-like%2C transcript variant X4	gene29174	0	1791
ort000005	XP_021710886.1	IQ motif and SEC7 domain-containing protein 1%2C transcript variant X10	gene16586	0	1756	XP_019524841.1	IQ motif and SEC7 domain-containing protein 1-like%2C transcript variant X4	gene29174	0	1789
ort000006	XP_021704402.1	zinc finger protein 236%2C transcript variant X2	gene16594	0	1079	XP_019524843.1	uncharacterized LOC109396984	gene29177	0	1095
ort000007	XP_021710107.1	uncharacterized LOC5567237%2C transcript variant X5	gene16599	0	1642	XP_019524846.1	uncharacterized LOC109396989%2C transcript variant X3	gene29183	0	1641
ort000008	XP_001651675.2	zinc finger protein 26%2C transcript variant X3	gene16591	0	1258	XP_019524849.1	zinc finger protein 236-like%2C transcript variant X2	gene29176	0	1220
ort000009	XP_001651650.2	GPI mannosyltransferase 4	gene16614	0	1291	XP_019524859.1	GPI mannosyltransferase 4-like	gene29203	0	1292
ort000010	XP_001651665.2	larval/pupal cuticle protein H1C	gene16600	5e-173	481	XP_019524860.1	larval/pupal cuticle protein H1C-like	gene29184	2e-176	489
ort000011	XP_001651670.2	pre-mRNA-splicing factor cwc25	gene16595	0	577	XP_019524865.1	pre-mRNA-splicing factor cwc25-like	gene29180	0	570
ort000012	XP_001662952.2	bifunctional purine biosynthesis protein PURH	gene3458	0	1196	XP_019524867.1	bifunctional purine biosynthesis protein PURH-like	gene3277	0	1196
ort000013	XP_021706778.1	glutactin%2C transcript variant X1	gene16619	0	1029	XP_019524869.1	glutactin-like	gene29208	0	1029
ort000014	XP_001656770.2	inactive pancreatic lipase-related protein 1	gene17113	1e-177	492	XP_019524871.1	pancreatic lipase-related protein 2-like	gene353	8e-178	492
ort000015	XP_021707316.1	paired box protein Pax-6-like%2C transcript variant X2	gene16585	0	865	XP_019524872.1	paired box protein Pax-6-like%2C transcript variant X3	gene29169	0	865
ort000016	XP_021707317.1	paired box protein Pax-6-like%2C transcript variant X2	gene16585	0	858	XP_019524873.1	paired box protein Pax-6-like%2C transcript variant X3	gene29169	0	858
ort000017	XP_021707318.1	paired box protein Pax-6-like%2C transcript variant X2	gene16585	0	685	XP_019524874.1	paired box protein Pax-6-like%2C transcript variant X3	gene29169	0	685
ort000018	XP_021706515.1	fatty acyl-CoA reductase wat	gene16652	0	617	XP_019524891.1	fatty acyl-CoA reductase wat-like	gene29240	0	617
ort000019	XP_021706517.1	trichohyalin	gene16669	0	876	XP_019524894.1	titin-like	gene29256	0	867
ort000020	XP_001662954.2	replication protein A 70 kDa DNA-binding subunit	gene3456	0	1111	XP_019524896.1	replication protein A 70 kDa DNA-binding subunit	gene3281	0	1139
ort000021	XP_021694281.1	uncharacterized LOC110674305	gene2714	7e-16	73.9	XP_019524903.1	uncharacterized LOC109397037	gene29302	6e-16	73.9
ort000022	XP_001663008.2	uncharacterized LOC5576909	gene16715	4e-56	175	XP_019524914.1	uncharacterized LOC109397048	gene29310	3e-56	175
ort000023	XP_001651615.1	fatty acyl-CoA reductase wat	gene16653	0	922	XP_019524915.1	fatty acyl-CoA reductase wat-like	gene29241	0	922
ort000024	XP_021693056.1	leucine-rich melanocyte differentiation-associated protein%2C transcript variant X1	gene3457	8e-178	489	XP_019524916.1	leucine-rich repeat-containing protein C10orf11 homolog	gene3279	6e-178	489
ort000025	XP_001651638.2	tetratricopeptide repeat protein 36 homolog	gene16633	1e-129	362	XP_019524917.1	tetratricopeptide repeat protein 36 homolog	gene29221	7e-130	362
ort000026	XP_001651649.3	glutactin	gene16616	0	616	XP_019524918.1	glutactin-like	gene29223	0	616
ort000027	XP_021704696.1	ras-related protein Rap-1b%2C transcript variant X2	gene16743	0	563	XP_019524920.1	ras-related protein Rap-1b-like	gene29339	0	563
ort000028	XP_001651639.2	zinc finger protein sens	gene16632	0	880	XP_019524921.1	zinc finger protein sens-like	gene29220	0	879
ort000029	XP_001659585.2	FAST kinase domain-containing protein 3%2C mitochondrial	gene16682	0	1286	XP_019524922.1	FAST kinase domain-containing protein 3%2C mitochondrial-like	gene29268	0	1286
ort000030	XP_001659582.2	xaa-Pro dipeptidase%2C transcript variant X1	gene16681	0	971	XP_019524924.1	xaa-Pro dipeptidase%2C transcript variant X3	gene29267	0	971
ort000031	XP_001659581.1	bolA-like protein 3	gene16686	2e-74	216	XP_019524927.1	bolA-like protein 3	gene29270	1e-74	216
ort000032	XP_021706519.1	bypass of stop codon protein 1-like	gene16728	2e-83	253	XP_019524933.1	spore coat protein SP96-like	gene29316	2e-96	286
ort000033	XP_001651613.2	fatty acyl-CoA reductase wat	gene16655	0	743	XP_019524934.1	fatty acyl-CoA reductase wat-like	gene29243	0	743
ort000034	XP_021705899.1	plasminogen	gene16741	3e-177	506	XP_019524939.1	coagulation factor XII	gene29335	0	540
ort000035	XP_021706287.1	host cell factor%2C transcript variant X5	gene16679	0	3040	XP_019524942.1	host cell factor-like%2C transcript variant X2	gene29266	0	3075
ort000036	XP_021706676.1	SLIT-ROBO Rho GTPase-activating protein 1%2C transcript variant X8	gene16729	0	2659	XP_019524945.1	SLIT-ROBO Rho GTPase-activating protein 1%2C transcript variant X2	gene29317	0	2659
ort000037	XP_021706689.1	uncharacterized LOC110678312	gene16731	1e-116	333	XP_019524948.1	uncharacterized LOC109397083	gene29321	1e-118	337
ort000038	XP_021706690.1	uncharacterized LOC110678313	gene16730	3e-56	177	XP_019524949.1	uncharacterized LOC109397084%2C transcript variant X2	gene29320	1e-62	193
ort000039	XP_001649157.2	cytochrome c-type heme lyase	gene3447	0	520	XP_019524953.1	cytochrome c-type heme lyase-like%2C transcript variant X1	gene3288	0	537
ort000040	XP_001662036.2	zinc finger protein 449	gene16689	0	541	XP_019524957.1	zinc finger protein 691-like%2C transcript variant X1	gene29275	0	527
ort000041	XP_001649156.2	uncharacterized LOC5564808	gene3445	0	1487	XP_019524962.1	uncharacterized LOC109397092%2C transcript variant X2	gene3289	0	1480
ort000042	XP_021707423.1	ras-related protein Rap-2a%2C transcript variant X2	gene16719	8e-137	380	XP_019524969.1	ras-related protein Rap-2a-like%2C transcript variant X3	gene29313	6e-137	380
ort000043	XP_021710699.1	organic cation transporter protein%2C transcript variant X2	gene16637	0	1128	XP_019524982.1	organic cation transporter protein-like	gene29222	0	1128
ort000044	XP_001663521.2	nucleolar GTP-binding protein 2	gene16735	0	1334	XP_019524987.1	nucleolar GTP-binding protein 2-like	gene29329	0	1334
ort000045	XP_021710680.1	uncharacterized LOC5575534%2C transcript variant X3	gene16695	0	3211	XP_019524993.1	uncharacterized LOC109397115	gene29279	0	3211
ort000046	XP_021710909.1	graves disease carrier protein homolog%2C transcript variant X9	gene16739	0	608	XP_019524999.1	graves disease carrier protein homolog	gene29330	0	608
ort000047	XP_001649155.2	protein C12orf4 homolog	gene3444	0	981	XP_019525002.1	protein C12orf4 homolog	gene3292	0	981
ort000048	XP_021709911.1	whirlin%2C transcript variant X1	gene16640	0	1253	XP_019525007.1	whirlin-like%2C transcript variant X2	gene29225	0	1253
ort000049	XP_021709916.1	pickpocket protein 28%2C transcript variant X2	gene16643	0	657	XP_019525011.1	pickpocket protein 28-like	gene29227	0	668
ort000050	XP_021709914.1	protein hunchback	gene16641	0	1109	XP_019525013.1	protein hunchback-like	gene29226	0	1085
ort000051	XP_011493298.1	keratin%2C type I cytoskeletal 9	gene3442	7e-104	296	XP_019525014.1	keratin%2C type II cytoskeletal 1-like	gene3293	5e-104	296
ort000052	XP_001660001.1	NADH dehydrogenase [ubiquinone] 1 alpha subcomplex subunit 9%2C mitochondrial	gene16700	0	819	XP_019525015.1	NADH dehydrogenase [ubiquinone] 1 alpha subcomplex subunit 9%2C mitochondrial-like	gene29286	0	819
ort000053	XP_001659999.1	syntaxin-7	gene16697	9e-176	488	XP_019525017.1	syntaxin-7-like	gene29283	2e-178	495
ort000054	XP_001651623.2	surface antigen CRP170	gene16645	0	773	XP_019525019.1	uncharacterized LOC109397135	gene29229	0	737
ort000055	XP_001651641.2	leucine-zipper-like transcriptional regulator 1	gene16629	0	1537	XP_019525020.1	leucine-zipper-like transcriptional regulator 1	gene29218	0	1584
ort000056	XP_001662032.1	mannose-1-phosphate guanyltransferase alpha-A	gene16694	0	872	XP_019525023.1	mannose-1-phosphate guanyltransferase alpha-A	gene29278	0	872
ort000057	XP_001663005.2	periodic tryptophan protein 1 homolog	gene16718	0	972	XP_019525031.1	periodic tryptophan protein 1 homolog	gene29312	0	972
ort000058	XP_021707111.1	homeobox protein vnd%2C transcript variant X2	gene16673	0	663	XP_019525034.1	homeobox protein vnd-like	gene29259	0	667
ort000059	XP_021708859.1	zinc finger protein 676	gene16676	0	761	XP_019525035.1	zinc finger protein 135-like	gene29263	0	775
ort000060	XP_021710721.1	synembryn	gene16699	0	1049	XP_019525038.1	synembryn-like	gene29285	0	1049
ort000061	XP_001663535.2	membrane-bound alkaline phosphatase	gene16747	0	749	XP_019525039.1	membrane-bound alkaline phosphatase-like	gene29343	0	748
ort000062	XP_001663006.2	uncharacterized LOC5576907	gene16717	3e-128	362	XP_019525042.1	uncharacterized LOC109397159	gene29311	1e-120	343
ort000063	XP_001651610.1	tenascin	gene16658	0	584	XP_019525043.1	tenascin	gene29247	0	575
ort000064	XP_001649460.2	uncharacterized LOC5565113	gene1060	2e-70	212	XP_019525050.1	uncharacterized LOC109397170	gene29368	2e-70	212
ort000065	XP_021694984.1	uncharacterized LOC5578629	gene1052	1e-44	144	XP_019525056.1	uncharacterized LOC109397176	gene29377	9e-45	144
ort000066	XP_001658618.2	uncharacterized LOC5569554	gene1067	2e-81	238	XP_019525059.1	uncharacterized LOC109397179	gene29358	2e-78	231
ort000067	XP_001658622.2	fatty acid hydroxylase domain-containing protein 2	gene1074	0	546	XP_019525060.1	fatty acid hydroxylase domain-containing protein 2-like	gene29351	0	568
ort000068	XP_021693037.1	metastasis-associated protein MTA3	gene3436	0	1786	XP_019525063.1	metastasis-associated protein MTA1	gene3300	0	1783
ort000069	XP_021695086.1	neurobeachin%2C transcript variant X14	gene1061	0	2543	XP_019525069.1	neurobeachin-like%2C transcript variant X11	gene29365	0	2543
ort000070	XP_021695173.1	uncharacterized LOC5569552%2C transcript variant X9	gene1064	0	706	XP_019525077.1	blood vessel epicardial substance-like%2C transcript variant X3	gene29359	0	692
ort000071	XP_001658614.1	transmembrane protein 205	gene1066	0	615	XP_019525080.1	transmembrane protein 205	gene29361	0	615
ort000072	XP_001658613.2	uncharacterized LOC5569555	gene1065	4e-91	264	XP_019525081.1	uncharacterized LOC109397191	gene29362	3e-91	264
ort000073	XP_021694935.1	serine-rich adhesin for platelets%2C transcript variant X4	gene1050	0	1331	XP_019525082.1	homeotic protein female sterile-like	gene29378	0	1390
ort000074	XP_021694229.1	lymphokine-activated killer T-cell-originated protein kinase	gene1059	0	783	XP_019525090.1	lymphokine-activated killer T-cell-originated protein kinase	gene29373	0	781
ort000075	XP_001658619.1	malignant T-cell-amplified sequence 1 homolog	gene1070	4e-135	375	XP_019525092.1	malignant T-cell-amplified sequence 1 homolog	gene29356	3e-135	375
ort000076	XP_021706598.1	uncharacterized LOC110678279	gene17856	3e-69	229	XP_019525096.1	uncharacterized LOC109397208	gene29400	1e-69	229
ort000077	XP_021693036.1	traB domain-containing protein%2C transcript variant X2	gene3435	0	900	XP_019525099.1	traB domain-containing protein-like%2C transcript variant X1	gene3303	0	892
ort000078	XP_021706877.1	RNA-binding protein rsd1-like%2C transcript variant X2	gene2198	7e-92	274	XP_019525102.1	polyadenylate-binding protein 4-like	gene29393	5e-92	274
ort000079	XP_001656773.1	uncharacterized LOC5578080	gene17115	2e-111	315	XP_019525108.1	uncharacterized LOC109397074%2C transcript variant X3	gene355	1e-111	315
ort000080	XP_001658458.1	uncharacterized LOC5569388%2C transcript variant X1	gene2464	0	1582	XP_019525115.1	uncharacterized LOC109397248%2C transcript variant X2	gene29426	0	1582
ort000081	XP_001653270.2	pyrroline-5-carboxylate reductase	gene2477	0	560	XP_019525120.1	pyrroline-5-carboxylate reductase-like	gene29416	0	560
ort000082	XP_001653272.1	coiled-coil domain-containing protein 124	gene19063	1e-145	404	XP_019525121.1	coiled-coil domain-containing protein 124-like	gene29415	8e-146	404
ort000083	XP_011492951.1	isochorismatase domain-containing protein 1%2C transcript variant X1	gene18849	2e-139	388	XP_019525122.1	isochorismatase domain-containing protein 1-like	gene29433	1e-139	388
ort000084	XP_021709314.1	uncharacterized LOC5570601%2C transcript variant X2	gene2473	0	650	XP_019525126.1	uncharacterized LOC109397259	gene29421	0	634
ort000085	XP_021708743.1	uncharacterized LOC110679095	gene2409	1e-137	397	XP_019525136.1	uncharacterized LOC109397272	gene29470	9e-138	397
ort000086	XP_001655182.1	aminoacylase-1B%2C transcript variant X1	gene62	0	559	XP_019525147.1	aminoacylase-1-like	gene29458	0	559
ort000087	XP_021708725.1	hemicentin-1	gene2406	0	2006	XP_019525148.1	hemicentin-1-like	gene29472	0	2006
ort000088	XP_021708760.1	BCL2/adenovirus E1B 19 kDa protein-interacting protein 3%2C transcript variant X4	gene2414	0	507	XP_019525150.1	BCL2/adenovirus E1B 19 kDa protein-interacting protein 3-like%2C transcript variant X2	gene29469	0	507
ort000089	XP_001657977.2	leishmanolysin-like peptidase	gene2419	0	1334	XP_019525157.1	leishmanolysin-like peptidase%2C transcript variant X2	gene29465	0	1334
ort000090	XP_001654851.1	transcription initiation factor IIA subunit 2	gene3493	1e-80	232	XP_019525165.1	transcription initiation factor IIA subunit 2-like	gene3245	1e-80	232
ort000091	XP_001657975.2	DNA polymerase iota	gene2424	0	1194	XP_019525167.1	DNA polymerase iota-like%2C transcript variant X4	gene29463	0	1212
ort000092	XP_021699412.1	sodium-independent sulfate anion transporter%2C transcript variant X2	gene1482	0	773	XP_019525172.1	sodium-independent sulfate anion transporter-like%2C transcript variant X4	gene29452	0	786
ort000093	XP_021693079.1	vesicle transport v-SNARE 12	gene3487	2e-67	199	XP_019525178.1	vesicle transport v-SNARE 12	gene3249	2e-67	199
ort000094	XP_001657974.1	aurora kinase B	gene2425	0	649	XP_019525179.1	aurora kinase B-like	gene29462	0	649
ort000095	XP_001657979.2	protein hedgehog	gene2417	0	777	XP_019525181.1	protein hedgehog-like	gene29468	0	798
ort000096	XP_021709051.1	uncharacterized LOC5571018%2C transcript variant X1	gene2444	2e-169	473	XP_019525184.1	uncharacterized LOC109397310	gene29444	6e-166	464
ort000097	XP_021696887.1	uncharacterized LOC110675641%2C transcript variant X1	gene5469	0	808	XP_019525185.1	uncharacterized LOC109397311	gene29495	0	862
ort000098	XP_021696904.1	uncharacterized LOC110675646	gene5476	0	649	XP_019525186.1	uncharacterized LOC109397312	gene29500	0	613
ort000099	XP_001650017.1	uncharacterized LOC5565660	gene5459	2e-57	178	XP_019525198.1	uncharacterized LOC109397323	gene29485	1e-57	178
ort000100	XP_021702674.1	uncharacterized LOC110676952	gene5461	3e-93	269	XP_019525199.1	uncharacterized LOC109397326	gene29487	2e-93	269
ort000101	XP_001650012.1	uncharacterized LOC5565664	gene5466	3e-150	420	XP_019525200.1	uncharacterized LOC109397327	gene29494	5e-148	414
ort000102	XP_001651375.2	uncharacterized LOC5566962	gene5460	1e-118	334	XP_019525201.1	uncharacterized LOC109397329	gene29486	8e-119	334
ort000103	XP_021703262.1	uncharacterized LOC110677043	gene5483	9e-54	166	XP_019525206.1	uncharacterized LOC109397334	gene29508	5e-50	156
ort000104	XP_001650002.2	D-glucuronyl C5-epimerase%2C transcript variant X1	gene5481	0	1207	XP_019525223.1	D-glucuronyl C5-epimerase-like	gene29505	0	1207
ort000105	XP_021696913.1	syntaxin-17	gene5496	0	556	XP_019525228.1	syntaxin-17-like	gene29517	0	555
ort000106	XP_001654793.1	uncharacterized LOC5573764	gene5498	0	899	XP_019525231.1	uncharacterized LOC109397359%2C transcript variant X2	gene29518	0	899
ort000107	XP_021696914.1	epidermal growth factor-like protein 7%2C transcript variant X3	gene5499	0	685	XP_019525232.1	uncharacterized LOC109397360	gene29519	0	704
ort000108	XP_001654796.1	uncharacterized LOC5573767%2C transcript variant X2	gene5503	3e-107	301	XP_019525235.1	uncharacterized LOC109397362%2C transcript variant X2	gene29524	3e-107	301
ort000109	XP_021696918.1	probable G-protein coupled receptor 52%2C transcript variant X2	gene5500	0	644	XP_019525241.1	probable G-protein coupled receptor 52	gene29522	0	644
ort000110	XP_021706495.1	uncharacterized LOC5567436	gene16207	0	1134	XP_019525245.1	uncharacterized LOC109397383	gene29543	0	1134
ort000111	XP_021707988.1	uncharacterized LOC5567431%2C transcript variant X1	gene16204	2e-137	383	XP_019525248.1	uncharacterized LOC109397387	gene29542	2e-143	397
ort000112	XP_021706496.1	histone H2B-like	gene16222	2e-64	193	XP_019525249.1	late histone H2B.L4-like	gene29562	4e-68	202
ort000113	XP_001657436.1	insulin-like growth factor-binding protein complex acid labile subunit	gene16201	0	989	XP_019525252.1	leucine-rich repeats and immunoglobulin-like domains protein 1	gene29540	0	1009
ort000114	XP_021707963.1	beta-arrestin-1%2C transcript variant X13	gene16211	0	946	XP_019525256.1	beta-arrestin-1-like%2C transcript variant X5	gene29550	0	946
ort000115	XP_001663895.2	trypsin 5G1	gene16217	8e-157	437	XP_019525260.1	trypsin 5G1-like	gene29557	6e-157	437
ort000116	XP_001663898.2	trypsin 5G1-like	gene16214	8e-168	465	XP_019525263.1	trypsin 5G1-like	gene29552	2e-170	472
ort000117	XP_001660676.2	trypsin 5G1-like	gene16219	4e-159	443	XP_019525266.1	trypsin 5G1-like	gene29558	3e-159	443
ort000118	XP_021707246.1	dnaJ homolog subfamily B member 6%2C transcript variant X4	gene16228	0	514	XP_019525272.1	dnaJ homolog subfamily B member 6-like%2C transcript variant X2	gene29568	0	514
ort000119	XP_021710242.1	ras-related protein Rab6%2C transcript variant X2	gene16209	3e-158	436	XP_019525274.1	ras-related protein Rab6%2C transcript variant X2	gene29548	2e-158	436
ort000120	XP_021710243.1	ras-related protein Rab6%2C transcript variant X2	gene16209	1e-157	434	XP_019525275.1	ras-related protein Rab6%2C transcript variant X2	gene29548	1e-157	434
ort000121	XP_021707973.1	probable peptide chain release factor C12orf65%2C mitochondrial	gene16224	3e-86	248	XP_019525277.1	probable peptide chain release factor C12orf65 homolog%2C mitochondrial	gene29565	2e-86	248
ort000122	XP_001650699.1	tubulin-specific chaperone D	gene16240	0	2110	XP_019525281.1	tubulin-specific chaperone D	gene29577	0	2135
ort000123	XP_021707971.1	uncharacterized LOC5575688%2C transcript variant X1	gene16221	0	1644	XP_019525282.1	uncharacterized LOC109397418	gene29561	0	1644
ort000124	XP_001662144.1	NEDD8-conjugating enzyme UBE2F	gene16232	3e-130	363	XP_019525284.1	NEDD8-conjugating enzyme UBE2F-like	gene29571	2e-130	363
ort000125	XP_001662145.2	galectin-4	gene16233	3e-83	241	XP_019525285.1	galectin-4-like	gene29572	2e-83	241
ort000126	XP_001650705.1	galectin-4	gene16234	9e-105	295	XP_019525286.1	galectin-4	gene29573	7e-105	295
ort000127	XP_001657447.2	protein FAM8A1	gene16208	4e-170	475	XP_019525288.1	protein FAM8A1-like	gene29546	0	509
ort000128	XP_001662142.2	uncharacterized LOC5575696	gene16227	7e-104	294	XP_019525289.1	uncharacterized LOC109397424	gene29567	5e-104	294
ort000129	XP_001657428.2	uncharacterized LOC5567450	gene16206	1e-146	408	XP_019525290.1	uncharacterized LOC109397425	gene29544	1e-146	408
ort000130	XP_021708471.1	alpha-actinin%2C sarcomeric%2C transcript variant X2	gene14593	0	1853	XP_019525293.1	alpha-actinin%2C sarcomeric%2C transcript variant X1	gene29585	0	1853
ort000131	XP_001652642.1	surfeit locus protein 6 homolog	gene14589	1e-174	484	XP_019525300.1	surfeit locus protein 6 homolog%2C transcript variant X2	gene29598	1e-174	484
ort000132	XP_001649171.2	transcription factor glial cells missing	gene8727	0	978	XP_019525321.1	transcription factor glial cells missing-like	gene3313	0	989
ort000133	XP_021702146.1	etoposide-induced protein 2.4 homolog	gene9880	0	692	XP_019525334.1	etoposide-induced protein 2.4 homolog%2C transcript variant X2	gene29640	0	716
ort000134	XP_001657636.1	coiled-coil domain-containing protein 97	gene9877	0	662	XP_019525338.1	etoposide-induced protein 2.4 homolog%2C transcript variant X2	gene29640	0	663
ort000135	XP_001657637.2	transforming growth factor beta regulator 1	gene9878	0	660	XP_019525339.1	transforming growth factor beta regulator 1%2C transcript variant X1	gene29641	0	659
ort000136	XP_021702147.1	trafficking protein particle complex subunit 4	gene9881	1e-154	427	XP_019525341.1	trafficking protein particle complex subunit 4	gene29642	1e-154	427
ort000137	XP_001652595.1	cullin-3%2C transcript variant X5	gene9882	0	1425	XP_019525342.1	cullin-3	gene29643	0	1425
ort000138	XP_021701360.1	dual 3'%2C5'-cyclic-AMP and -GMP phosphodiesterase 11%2C transcript variant X9	gene9112	0	2097	XP_019525355.1	dual 3'%2C5'-cyclic-AMP and -GMP phosphodiesterase 11-like%2C transcript variant X2	gene29663	0	2131
ort000139	XP_021701383.1	transducin beta-like protein 3	gene9127	0	1542	XP_019525364.2	transducin beta-like protein 3	gene15838	0	1542
ort000140	XP_001649341.1	uncharacterized LOC5564996	gene9117	6e-111	311	XP_019525371.1	uncharacterized LOC109397526	gene29672	4e-111	311
ort000141	XP_021700940.1	tetratricopeptide repeat protein 14 homolog	gene8721	0	1467	XP_019525374.1	tetratricopeptide repeat protein 14 homolog	gene3321	0	1454
ort000142	XP_001649339.1	uncharacterized LOC5564989	gene9119	3e-116	326	XP_019525375.1	uncharacterized LOC109397529	gene29674	2e-116	326
ort000143	XP_001658269.2	NADPH-dependent aldo-keto reductase%2C chloroplastic	gene9143	0	552	XP_019525378.1	aldo-keto reductase family 4 member C10%2C transcript variant X2	gene29690	0	552
ort000144	XP_001658194.1	probable NADH dehydrogenase [ubiquinone] 1 alpha subcomplex subunit 12	gene9108	3e-105	297	XP_019525384.1	probable NADH dehydrogenase [ubiquinone] 1 alpha subcomplex subunit 12%2C transcript variant X2	gene29658	2e-105	297
ort000145	XP_001658273.1	transcription factor E2F5	gene9147	0	553	XP_019525385.2	transcription factor E2F5	gene15821	0	553
ort000146	XP_021700939.1	putative uncharacterized protein DDB_G0282129	gene8719	9e-158	455	XP_019525386.1	putative uncharacterized protein DDB_G0277255%2C transcript variant X3	gene3322	2e-175	499
ort000147	XP_001649343.2	uncharacterized LOC5564993	gene9116	6e-49	150	XP_019525388.1	uncharacterized LOC109397540	gene29668	4e-49	150
ort000148	XP_021701350.1	synaptotagmin-1%2C transcript variant X9	gene9110	0	928	XP_019525392.1	synaptotagmin-5%2C transcript variant X1	gene29661	0	955
ort000149	XP_001649337.1	glyoxylate reductase/hydroxypyruvate reductase	gene9123	0	620	XP_019525397.1	glyoxylate reductase/hydroxypyruvate reductase	gene29676	0	620
ort000150	XP_021701340.1	protein amalgam	gene9103	0	907	XP_019525403.1	protein amalgam-like	gene29648	0	896
ort000151	XP_001648654.2	transcription factor SOX-3	gene8718	0	1154	XP_019525406.1	transcription factor SOX-3	gene3326	0	1120
ort000152	XP_021701393.1	carbohydrate-responsive element-binding protein%2C transcript variant X8	gene9149	0	1671	XP_019525410.1	polyhomeotic-proximal chromatin protein-like%2C transcript variant X2	gene29700	0	1746
ort000153	XP_021711922.1	uncharacterized LOC110674016	gene18314	0	593	XP_019525415.1	uncharacterized LOC109397576%2C transcript variant X2	gene29712	0	593
ort000154	XP_001662656.2	calcium uptake protein 3%2C mitochondrial	gene1563	0	666	XP_019525420.1	calcium uptake protein 3%2C mitochondrial-like	gene29722	0	666
ort000155	XP_021694218.1	uncharacterized LOC110674259	gene797	1e-11	61.2	XP_019525424.1	RNA polymerase II degradation factor 1-like%2C transcript variant X1	gene29738	1e-11	61.2
ort000156	XP_021700400.1	protein white%2C transcript variant X3	gene1567	0	1462	XP_019525428.1	protein white%2C transcript variant X5	gene29716	0	1462
ort000157	XP_011492980.2	protein white%2C transcript variant X3	gene1567	0	1411	XP_019525431.1	protein white%2C transcript variant X5	gene29716	0	1411
ort000158	XP_021700408.1	protein white%2C transcript variant X3	gene1567	0	1397	XP_019525432.1	protein white%2C transcript variant X5	gene29716	0	1397
ort000159	XP_001662658.2	probable 28S rRNA (cytosine-C(5))-methyltransferase%2C transcript variant X1	gene1565	0	958	XP_019525435.1	probable 28S rRNA (cytosine-C(5))-methyltransferase	gene29718	0	939
ort000160	XP_021700312.1	uncharacterized LOC5576462%2C transcript variant X1	gene1562	0	3409	XP_019525438.1	uncharacterized LOC109397601%2C transcript variant X3	gene29723	0	3400
ort000161	XP_001662652.1	uncharacterized LOC5576463	gene19327	4e-93	268	XP_019525445.1	uncharacterized LOC109397609	gene29734	2e-102	291
ort000162	XP_021694245.1	alpha-2 adrenergic receptor	gene1556	9e-157	435	XP_019525447.1	alpha-2 adrenergic receptor-like	gene29743	8e-157	435
ort000163	XP_021698478.1	BTB/POZ domain-containing protein KCTD12	gene1368	1e-165	456	XP_019525459.1	BTB/POZ domain-containing protein KCTD12-like	gene29758	7e-166	456
ort000164	XP_021698583.1	leucine-rich repeat serine/threonine-protein kinase 1%2C transcript variant X5	gene1375	0	4967	XP_019525460.1	leucine-rich repeat serine/threonine-protein kinase 1-like%2C transcript variant X4	gene29767	0	4967
ort000165	XP_021698428.1	RNA-binding protein MEX3B%2C transcript variant X1	gene1365	0	707	XP_019525467.1	RNA-binding protein MEX3B-like%2C transcript variant X1	gene29755	0	732
ort000166	XP_021698366.1	palmitoyltransferase ZDHHC6%2C transcript variant X1	gene1361	0	817	XP_019525473.1	palmitoyltransferase ZDHHC6-like%2C transcript variant X3	gene29751	0	817
ort000167	XP_021698454.1	uncharacterized LOC23687674	gene1366	0	1121	XP_019525475.1	rho GTPase-activating protein gacF-like%2C transcript variant X2	gene29756	0	1161
ort000168	XP_001653258.1	DNA damage-regulated autophagy modulator protein 1	gene1372	0	513	XP_019525476.1	DNA damage-regulated autophagy modulator protein 1-like	gene29764	0	513
ort000169	XP_021698492.1	uncharacterized LOC5570082%2C transcript variant X1	gene1370	0	541	XP_019525477.1	uncharacterized LOC109397642%2C transcript variant X2	gene29761	0	550
ort000170	XP_001662826.2	protein CutA homolog%2C transcript variant X1	gene1364	8e-94	271	XP_019525482.1	divalent-cation tolerance protein CutA-like%2C transcript variant X2	gene29754	6e-94	271
ort000171	XP_021698410.1	protein CutA homolog%2C transcript variant X1	gene1364	4e-89	258	XP_019525483.1	divalent-cation tolerance protein CutA-like%2C transcript variant X2	gene29754	3e-89	258
ort000172	XP_021696583.1	RNA-binding protein 1%2C transcript variant X3	gene5256	3e-71	218	XP_019525485.1	RNA-binding protein 1-like%2C transcript variant X5	gene3330	3e-71	218
ort000173	XP_001661616.2	GDP-D-glucose phosphorylase 1	gene1384	0	566	XP_019525495.1	GDP-D-glucose phosphorylase 1-like	gene29780	0	566
ort000174	XP_021698611.1	uncharacterized LOC5570598	gene1378	0	1389	XP_019525497.2	uncharacterized LOC109397657	gene29773	0	1392
ort000175	XP_001653077.1	RNA-binding protein 1%2C transcript variant X3	gene5256	1e-85	246	XP_019525515.1	RNA-binding protein 1-like%2C transcript variant X5	gene3330	8e-86	246
ort000176	XP_021699059.1	uncharacterized LOC5571992	gene1429	0	850	XP_019525521.1	uncharacterized LOC109397675	gene29844	0	850
ort000177	XP_021698909.1	uncharacterized LOC110676221	gene1413	2e-88	259	XP_019525524.1	uncharacterized LOC109397677	gene29822	2e-81	241
ort000178	XP_001660116.2	uncharacterized LOC5572010	gene1412	6e-113	321	XP_019525526.1	uncharacterized LOC109397679	gene29821	5e-113	321
ort000179	XP_001659112.2	uncharacterized LOC5570404	gene1407	4e-44	138	XP_019525530.1	uncharacterized LOC109397685	gene29814	3e-44	138
ort000180	XP_001653076.1	anaphase-promoting complex subunit 15	gene5257	8e-58	175	XP_019525531.1	anaphase-promoting complex subunit 15-like	gene3331	1e-56	172
ort000181	XP_001660097.2	uncharacterized LOC5571994	gene1430	0	523	XP_019525533.1	uncharacterized LOC109397690	gene29845	0	544
ort000182	XP_021698953.1	CAD protein	gene1418	0	4542	XP_019525535.1	CAD protein%2C transcript variant X1	gene29831	0	4542
ort000183	XP_021696587.1	myb-like protein Q%2C transcript variant X1	gene5259	0	587	XP_019525539.1	transcription factor SPT20 homolog	gene3332	0	594
ort000184	XP_021699165.1	nuclear pore complex protein Nup153%2C transcript variant X3	gene1439	0	2064	XP_019525543.1	nuclear pore complex protein Nup153-like%2C transcript variant X3	gene29853	0	2184
ort000185	XP_021698829.1	cadherin-86C%2C transcript variant X3	gene1403	0	3236	XP_019525569.1	cadherin-86C-like	gene29810	0	3223
ort000186	XP_021698892.1	CKLF-like MARVEL transmembrane domain-containing protein 4	gene1411	2e-120	337	XP_019525573.1	CKLF-like MARVEL transmembrane domain-containing protein 4	gene29819	2e-120	337
ort000187	XP_021698687.1	PAX-interacting protein 1%2C transcript variant X3	gene1393	0	878	XP_019525576.1	PAX-interacting protein 1-like%2C transcript variant X2	gene29796	0	870
ort000188	XP_021696593.1	uncharacterized LOC110675571	gene5261	6e-114	322	XP_019525583.1	uncharacterized LOC109397721	gene3334	5e-114	322
ort000189	XP_001660114.1	uncharacterized LOC5572008	gene1415	8e-113	318	XP_019525584.1	uncharacterized LOC109397724	gene29824	6e-113	318
ort000190	XP_021699143.1	uncharacterized LOC110676261%2C transcript variant X1	gene1437	0	892	XP_019525594.1	uncharacterized LOC109397731	gene29852	0	892
ort000191	XP_021712810.1	uncharacterized LOC110681377	gene19442	5e-104	296	XP_019525595.1	uncharacterized LOC109397728	gene3341	4e-104	296
ort000192	XP_021699084.1	proton-coupled amino acid transporter 1-like%2C transcript variant X3	gene1434	0	874	XP_019525598.1	proton-coupled amino acid transporter 1-like%2C transcript variant X1	gene29847	0	876
ort000193	XP_021696595.1	uncharacterized LOC110675573	gene5260	7e-78	229	XP_019525612.1	uncharacterized LOC109397749	gene3333	4e-85	247
ort000194	XP_021705175.1	phospholipase A2-like%2C transcript variant X1	gene14805	5e-151	421	XP_019525615.1	uncharacterized LOC109397756	gene29890	1e-156	435
ort000195	XP_001656777.2	spondin-1	gene17118	0	1526	XP_019525618.1	spondin-1-like%2C transcript variant X1	gene357	0	1503
ort000196	XP_001653940.1	collagenase	gene14794	0	519	XP_019525619.1	collagenase-like%2C transcript variant X2	gene29881	0	519
ort000197	XP_021708962.1	uncharacterized LOC110679172	gene14802	0	858	XP_019525621.1	uncharacterized LOC109397761	gene29888	0	843
ort000198	XP_021707504.1	pyruvate carboxylase%2C mitochondrial%2C transcript variant X2	gene14793	0	2464	XP_019525624.1	pyruvate carboxylase%2C mitochondrial%2C transcript variant X4	gene29880	0	2464
ort000199	XP_001653938.2	protein Red	gene14795	0	741	XP_019525633.1	protein Red-like%2C transcript variant X2	gene29882	0	741
ort000200	XP_001653939.1	vitamin K-dependent protein C	gene14796	6e-157	437	XP_019525634.1	chymotrypsin-like	gene29884	4e-157	437
ort000201	XP_021704144.1	rhomboid-related protein 2%2C transcript variant X1	gene14797	0	798	XP_019525635.1	rhomboid-related protein 2-like%2C transcript variant X1	gene29885	0	798
ort000202	XP_021705174.1	group 3 secretory phospholipase A2%2C transcript variant X2	gene14803	0	565	XP_019525642.1	group 3 secretory phospholipase A2-like%2C transcript variant X2	gene29889	0	566
ort000203	XP_021707778.1	zinc finger protein 2 homolog	gene14807	0	874	XP_019525645.1	zinc finger imprinted 3-like	gene29894	0	892
ort000204	XP_001653945.2	chymotrypsin-2	gene14790	9e-154	428	XP_019525646.1	chymotrypsin-2-like	gene29875	6e-154	428
ort000205	XP_001653943.1	farnesol dehydrogenase-like	gene14791	0	531	XP_019525648.1	farnesol dehydrogenase-like%2C transcript variant X2	gene29878	0	531
ort000206	XP_021711830.1	farnesol dehydrogenase-like	gene18163	4e-166	459	XP_019525649.1	farnesol dehydrogenase-like	gene29870	2e-166	460
ort000207	XP_021708746.1	uncharacterized LOC5572259	gene14792	7e-125	355	XP_019525650.1	uncharacterized LOC109397787	gene29879	3e-135	380
ort000208	XP_001660212.2	uncharacterized LOC5572131	gene14812	0	527	XP_019525654.1	uncharacterized LOC109397790	gene29896	0	527
ort000209	XP_021700202.1	lachesin%2C transcript variant X1	gene8081	0	911	XP_019525663.1	lachesin-like%2C transcript variant X2	gene29902	0	911
ort000210	XP_001650620.1	methionyl-tRNA formyltransferase%2C mitochondrial	gene50	0	616	XP_019525666.1	methionyl-tRNA formyltransferase%2C mitochondrial-like	gene29935	0	616
ort000211	XP_001660333.1	lipoamide acyltransferase component of branched-chain alpha-keto acid dehydrogenase complex%2C mitochondrial	gene83	0	922	XP_019525675.1	lipoamide acyltransferase component of branched-chain alpha-keto acid dehydrogenase complex%2C mitochondrial-like	gene29909	0	922
ort000212	XP_001660334.1	ethanolamine kinase	gene82	0	657	XP_019525676.1	ethanolamine kinase	gene29910	0	655
ort000213	XP_001655181.1	aminoacylase-1B%2C transcript variant X1	gene62	0	825	XP_019525677.1	aminoacylase-1B-like	gene29926	0	825
ort000214	XP_021711707.1	probable histone-lysine N-methyltransferase set-23	gene18038	6e-52	168	XP_019525678.1	probable histone-lysine N-methyltransferase set-23%2C transcript variant X1	gene29925	8e-52	168
ort000215	XP_001655180.1	uncharacterized LOC5574528	gene64	5e-115	325	XP_019525679.1	probable histone-lysine N-methyltransferase set-23%2C transcript variant X1	gene29925	4e-115	325
ort000216	XP_021694475.1	rab11 family-interacting protein 5%2C transcript variant X1	gene52	0	1091	XP_019525681.1	rab11 family-interacting protein 5-like%2C transcript variant X2	gene29933	0	1114
ort000217	XP_001658387.1	probable cytochrome P450 308a1	gene5274	0	952	XP_019525682.1	probable cytochrome P450 308a1	gene3348	0	952
ort000218	XP_001650614.1	dynactin subunit 4	gene56	0	964	XP_019525683.1	dynactin subunit 4-like	gene29931	0	964
ort000219	XP_001650616.1	40S ribosomal protein S14%2C transcript variant X2	gene55	6e-109	306	XP_019525684.1	40S ribosomal protein S14%2C transcript variant X2	gene29932	4e-109	306
ort000220	XP_021694479.1	glucose-induced degradation protein 4 homolog	gene58	5e-155	435	XP_019525686.1	uncharacterized LOC109397815	gene29930	8e-155	435
ort000221	XP_001655183.2	DDB1- and CUL4-associated factor 7	gene61	0	719	XP_019525692.1	DDB1- and CUL4-associated factor 7%2C transcript variant X1	gene29927	0	719
ort000222	XP_001660336.1	kelch-like protein 40a	gene80	0	740	XP_019525696.1	kelch-like protein 40b	gene29914	0	740
ort000223	XP_021694474.1	uncharacterized LOC5566213%2C transcript variant X2	gene51	0	986	XP_019525698.1	uncharacterized LOC109397823	gene29934	0	1015
ort000224	XP_021694471.1	tRNA dimethylallyltransferase%2C mitochondrial	gene46	0	865	XP_019525699.1	tRNA dimethylallyltransferase%2C mitochondrial-like	gene29937	0	872
ort000225	XP_001655177.1	max-like protein X	gene68	1e-143	402	XP_019525700.1	max-like protein X	gene29924	4e-144	403
ort000226	XP_001655173.1	39S ribosomal protein L38%2C mitochondrial	gene74	0	786	XP_019525701.1	39S ribosomal protein L38%2C mitochondrial-like	gene29921	0	786
ort000227	XP_001655179.1	tRNA:m(4)X modification enzyme TRM13 homolog	gene67	0	722	XP_019525702.1	tRNA:m(4)X modification enzyme TRM13 homolog	gene29923	0	714
ort000228	XP_021694486.1	cytochrome P450 307a1	gene78	0	1142	XP_019525703.1	cytochrome P450 307a1-like	gene29916	0	1142
ort000229	XP_021694477.1	protein msta%2C transcript variant X2	gene641	0	837	XP_019525709.1	uncharacterized LOC109397833	gene29939	0	848
ort000230	XP_001658384.1	uncharacterized aarF domain-containing protein kinase 5	gene5279	0	1008	XP_019525725.1	uncharacterized aarF domain-containing protein kinase 5	gene3352	0	987
ort000231	XP_021697607.1	lysine--tRNA ligase%2C transcript variant X1	gene677	0	1054	XP_019525727.1	lysine--tRNA ligase%2C transcript variant X1	gene29975	0	1056
ort000232	XP_021697735.1	basic proline-rich protein	gene678	0	1026	XP_019525728.1	basic proline-rich protein	gene29976	0	1026
ort000233	XP_001649363.2	transmembrane protein 183	gene679	0	551	XP_019525730.1	transmembrane protein 183-like%2C transcript variant X3	gene29977	0	551
ort000234	XP_021695716.1	uncharacterized LOC5579004%2C transcript variant X2	gene657	0	1545	XP_019525735.1	uncharacterized LOC109397859%2C transcript variant X2	gene29960	0	1484
ort000235	XP_021699929.1	dorsal-ventral patterning protein Sog	gene706	0	1895	XP_019525746.1	dorsal-ventral patterning protein Sog	gene30000	0	1891
ort000236	XP_021697182.1	NECAP-like protein CG9132	gene674	3e-178	489	XP_019525750.1	NECAP-like protein CG9132%2C transcript variant X1	gene29970	2e-178	489
ort000237	XP_021699444.1	uncharacterized LOC5569196	gene696	0	1166	XP_019525754.1	uncharacterized LOC109397869	gene29996	0	1115
ort000238	XP_021701743.1	uncharacterized LOC5566765%2C transcript variant X7	gene720	0	1204	XP_019525761.1	uncharacterized LOC109397879	gene30016	0	1228
ort000239	XP_021701317.1	exostosin-2	gene718	0	1488	XP_019525762.1	exostosin-2-like	gene30012	0	1461
ort000240	XP_021700407.1	contactin-2%2C transcript variant X6	gene709	0	609	XP_019525764.1	contactin-2-like%2C transcript variant X1	gene30006	0	611
ort000241	XP_001651175.2	ER degradation-enhancing alpha-mannosidase-like protein 2	gene719	0	1442	XP_019525765.1	ER degradation-enhancing alpha-mannosidase-like protein 2	gene30013	0	1452
ort000242	XP_001651180.1	60S ribosomal protein L35	gene712	1e-81	235	XP_019525767.1	60S ribosomal protein L35-like	gene30008	9e-82	235
ort000243	XP_021699364.1	zinc finger protein 250	gene695	5e-120	354	XP_019525770.1	transcription factor Ouib-like%2C transcript variant X3	gene29989	2e-121	357
ort000244	XP_021698961.1	transcription factor Ouib	gene689	1e-160	455	XP_019525773.1	ras-responsive element-binding protein 1-like	gene29987	6e-164	464
ort000245	XP_001651182.2	RNA-binding protein NOB1	gene711	0	701	XP_019525775.1	RNA-binding protein NOB1-like	gene30007	0	709
ort000246	XP_001651184.2	60S ribosomal protein L7	gene708	1e-179	493	XP_019525779.1	60S ribosomal protein L7-like	gene30002	1e-179	493
ort000247	XP_021696520.1	mitochondrial GTPase 1-like%2C transcript variant X1	gene668	0	635	XP_019525780.1	mitochondrial GTPase 1	gene29967	0	635
ort000248	XP_021696901.1	chromobox protein homolog 1-like	gene669	9e-114	322	XP_019525781.1	chromobox protein homolog 1-like	gene29966	5e-114	322
ort000249	XP_001649367.2	DDB1- and CUL4-associated factor 13	gene676	0	910	XP_019525782.1	DDB1- and CUL4-associated factor 13	gene29974	0	910
ort000250	XP_001664240.1	mediator of RNA polymerase II transcription subunit 23	gene5285	0	2722	XP_019525783.1	mediator of RNA polymerase II transcription subunit 23	gene3357	0	2727
ort000251	XP_001664189.2	uncharacterized protein F54F2.9	gene652	0	800	XP_019525784.1	uncharacterized protein F54F2.9-like	gene29953	0	785
ort000252	XP_001658374.1	mitotic checkpoint protein BUB3	gene694	0	684	XP_019525785.1	mitotic checkpoint protein BUB3-like	gene29993	0	684
ort000253	XP_001664176.2	transmembrane protein 129	gene672	0	720	XP_019525789.1	transmembrane protein 129-like	gene29969	0	720
ort000254	XP_001664181.2	uncharacterized LOC5579002	gene660	0	573	XP_019525793.1	uncharacterized LOC109397910%2C transcript variant X2	gene29963	0	573
ort000255	XP_001664241.2	transcriptional coactivator yorkie%2C transcript variant X2	gene5286	0	940	XP_019525794.1	transcriptional coactivator yorkie-like%2C transcript variant X1	gene3358	0	940
ort000256	XP_001664180.2	uncharacterized LOC5579001	gene662	0	498	XP_019525795.1	uncharacterized LOC109397911	gene29964	0	498
ort000257	XP_021696983.1	probable DNA-directed RNA polymerase III subunit RPC6	gene671	0	610	XP_019525797.1	probable DNA-directed RNA polymerase III subunit RPC6	gene29968	0	610
ort000258	XP_021696614.1	transcriptional coactivator yorkie%2C transcript variant X2	gene5286	0	645	XP_019525803.1	transcriptional coactivator yorkie-like%2C transcript variant X1	gene3358	0	653
ort000259	XP_001651171.1	uncharacterized LOC5566764	gene726	0	783	XP_019525808.1	uncharacterized LOC109397922	gene30021	0	783
ort000260	XP_001651173.2	uncharacterized LOC5566766	gene721	0	1212	XP_019525809.1	uncharacterized LOC109397923	gene30018	0	1242
ort000261	XP_001658569.2	uncharacterized LOC5569484	gene731	0	1802	XP_019525811.1	uncharacterized LOC109397927	gene30026	0	1815
ort000262	XP_001658568.1	uncharacterized LOC5569483	gene732	0	1441	XP_019525814.1	uncharacterized LOC109397928%2C transcript variant X2	gene30027	0	1441
ort000263	XP_001658571.2	28S ribosomal protein S29%2C mitochondrial	gene730	0	739	XP_019525816.1	28S ribosomal protein S29%2C mitochondrial-like	gene30025	0	739
ort000264	XP_021698269.1	mantle protein-like	gene11206	2e-86	251	XP_019525822.1	mantle protein-like	gene30031	9e-82	239
ort000265	XP_021698903.1	uncharacterized LOC23687835	gene7072	0	559	XP_019525826.1	gustatory and pheromone receptor 39a-like	gene30071	0	559
ort000266	XP_001662839.1	uncharacterized LOC5576701	gene12216	0	743	XP_019525831.1	uncharacterized LOC109397643	gene30	0	786
ort000267	XP_021698905.1	chymotrypsin-2	gene7076	2e-164	456	XP_019525841.1	chymotrypsin-1-like	gene30067	1e-164	456
ort000268	XP_001663815.1	uncharacterized LOC5578287	gene7044	5e-98	279	XP_019525842.1	uncharacterized LOC109397957	gene30098	1e-90	260
ort000269	XP_021698771.1	uncharacterized LOC110676188	gene6954	8e-54	162	XP_019525844.1	uncharacterized LOC109397959	gene30195	6e-54	162
ort000270	XP_021698773.1	uncharacterized LOC110676189	gene6958	5e-104	299	XP_019525846.1	uncharacterized LOC109397962	gene30191	4e-107	306
ort000271	XP_021698816.1	protein lingerer%2C transcript variant X14	gene6986	0	2306	XP_019525857.1	protein lingerer%2C transcript variant X10	gene30159	0	2306
ort000272	XP_021698809.1	protein lingerer%2C transcript variant X14	gene6986	0	2370	XP_019525862.1	protein lingerer%2C transcript variant X10	gene30159	0	2370
ort000273	XP_021698824.1	eukaryotic translation initiation factor 5B%2C transcript variant X2	gene6992	0	1335	XP_019525865.1	eukaryotic translation initiation factor 5B	gene30148	0	1372
ort000274	XP_021698873.1	serine-rich adhesin for platelets%2C transcript variant X1	gene7045	0	749	XP_019525874.1	homeobox protein 2%2C transcript variant X1	gene30091	0	778
ort000275	XP_021698921.1	probable RNA helicase armi%2C transcript variant X1	gene7098	0	2324	XP_019525879.1	probable RNA helicase armi%2C transcript variant X1	gene30035	0	2324
ort000276	XP_021698906.1	E3 ubiquitin-protein ligase listerin%2C transcript variant X1	gene7077	0	3326	XP_019525886.1	E3 ubiquitin-protein ligase listerin	gene30065	0	3328
ort000277	XP_001661386.2	uncharacterized LOC5574351	gene7078	0	632	XP_019525887.1	uncharacterized LOC109398006	gene30066	0	609
ort000278	XP_021698886.1	esterase B1%2C transcript variant X2	gene7060	0	1096	XP_019525895.1	acetylcholinesterase%2C transcript variant X4	gene30083	0	1096
ort000279	XP_001650374.3	venom carboxylesterase-6	gene7062	0	929	XP_019525897.1	acetylcholinesterase-like	gene30084	0	917
ort000280	XP_001661380.1	vacuolar protein sorting-associated protein 28 homolog	gene7081	1e-153	424	XP_019525900.1	vacuolar protein sorting-associated protein 28 homolog	gene30062	9e-154	424
ort000281	XP_001653435.1	ATP-dependent RNA helicase DBP2	gene15778	0	549	XP_019525907.1	DEAD-box ATP-dependent RNA helicase 20%2C transcript variant X2	gene30042	0	556
ort000282	XP_001651200.1	THO complex subunit 4-A	gene7055	7e-172	475	XP_019525914.1	THO complex subunit 4	gene30087	5e-172	475
ort000283	XP_001653862.1	eukaryotic translation initiation factor 3 subunit L	gene6982	0	1103	XP_019525915.1	eukaryotic translation initiation factor 3 subunit L	gene30163	0	1103
ort000284	XP_001659857.1	neurotactin	gene7000	0	1701	XP_019525918.1	neurotactin-like	gene30140	0	1701
ort000285	XP_021698856.1	collectin-10%2C transcript variant X7	gene7028	2e-113	327	XP_019525931.1	C-type lectin 37Db-like	gene30115	9e-114	327
ort000286	XP_021698850.1	transmembrane protein 11 homolog%2C mitochondrial%2C transcript variant X1	gene7018	1e-132	369	XP_019525932.1	transmembrane protein 11 homolog%2C mitochondrial-like%2C transcript variant X1	gene30123	1e-132	369
ort000287	XP_011493496.1	receptor expression-enhancing protein 5%2C transcript variant X3	gene6988	2e-128	359	XP_019525941.1	receptor expression-enhancing protein 5%2C transcript variant X4	gene30155	2e-128	359
ort000288	XP_001650383.2	cilia- and flagella-associated protein 44%2C transcript variant X1	gene7047	0	3573	XP_019525945.1	cilia- and flagella-associated protein 44-like	gene30089	0	3574
ort000289	XP_021698918.1	acetyl-coenzyme A transporter 1%2C transcript variant X1	gene7093	0	1033	XP_019525948.1	acetyl-coenzyme A transporter 1	gene30040	0	1033
ort000290	XP_021698847.1	peptidoglycan-recognition protein 3%2C transcript variant X1	gene7016	1e-174	483	XP_019525951.1	peptidoglycan-recognition protein SC1a/b%2C transcript variant X1	gene30125	7e-175	483
ort000291	XP_021698832.1	uncharacterized LOC110676202%2C transcript variant X3	gene7008	0	579	XP_019525952.1	uncharacterized LOC109398047	gene30132	0	579
ort000292	XP_001659851.2	serine protease SP24D	gene7011	9e-155	433	XP_019525954.1	serine protease SP24D%2C transcript variant X1	gene30133	7e-155	433
ort000293	XP_021702168.1	WD repeat-containing protein 78	gene5300	0	1376	XP_019525958.1	WD repeat-containing protein 78-like	gene3371	0	1382
ort000294	XP_021698915.1	uncharacterized LOC5577977%2C transcript variant X2	gene7087	0	810	XP_019525959.1	uncharacterized LOC109398054%2C transcript variant X3	gene30046	0	810
ort000295	XP_021698919.1	probable ATP-dependent RNA helicase Dbp73D	gene7096	0	1197	XP_019525963.1	probable ATP-dependent RNA helicase Dbp73D	gene30037	0	1170
ort000296	XP_001659861.2	uncharacterized LOC5571717	gene6996	0	2021	XP_019525965.1	uncharacterized LOC109398058	gene30147	0	2044
ort000297	XP_021698848.1	rab5 GDP/GTP exchange factor	gene7017	0	1330	XP_019525967.1	rab5 GDP/GTP exchange factor	gene30124	0	1330
ort000298	XP_001650112.2	uncharacterized LOC5565753	gene7082	0	1399	XP_019525968.1	uncharacterized LOC109398062	gene30060	0	1399
ort000299	XP_001652043.2	ras-related protein Rab-34	gene5299	0	510	XP_019525970.1	ras-related protein Rab-36-like	gene3372	0	510
ort000300	XP_021698870.1	tight junction-associated protein 1%2C transcript variant X2	gene7041	3e-162	447	XP_019525972.1	tight junction-associated protein 1-like%2C transcript variant X2	gene30101	2e-162	447
ort000301	XP_021698867.1	nicotinamide riboside kinase 1%2C transcript variant X5	gene7035	0	544	XP_019525973.1	nicotinamide riboside kinase 1-like%2C transcript variant X2	gene30107	0	544
ort000302	XP_021706804.1	uncharacterized LOC5578086%2C transcript variant X3	gene17120	0	1068	XP_019525975.1	uncharacterized LOC109398036	gene359	0	1073
ort000303	XP_021698871.1	sex-determining region Y protein	gene7043	0	869	XP_019525976.1	uncharacterized LOC109398066	gene30099	0	913
ort000304	XP_001661132.1	cell death-inducing p53-target protein 1%2C transcript variant X2	gene6951	2e-90	258	XP_019525980.1	cell death-inducing p53-target protein 1-like	gene30199	1e-90	258
ort000305	XP_021696645.1	probable nucleoporin Nup54%2C transcript variant X3	gene5305	0	894	XP_019525982.1	probable nucleoporin Nup54	gene3378	0	843
ort000306	XP_021698796.1	tRNA (guanine(37)-N1)-methyltransferase%2C transcript variant X1	gene6977	0	782	XP_019525983.1	tRNA (guanine(37)-N1)-methyltransferase-like	gene30168	0	782
ort000307	XP_011493495.2	ganglioside-induced differentiation-associated protein 1%2C transcript variant X2	gene6985	0	590	XP_019525984.1	ganglioside-induced differentiation-associated protein 1-like	gene30161	0	590
ort000308	XP_021698912.1	transcription factor grauzone%2C transcript variant X1	gene7086	0	810	XP_019525996.1	transcription factor grauzone-like%2C transcript variant X2	gene30051	0	835
ort000309	XP_021698851.1	uncharacterized LOC5575064	gene7019	0	2974	XP_019526002.1	protein FAM135B	gene30121	0	2974
ort000310	XP_001661389.1	transmembrane protein 177	gene7073	0	592	XP_019526008.1	transmembrane protein 177-like	gene30070	0	592
ort000311	XP_021698843.1	clavesin-2%2C transcript variant X4	gene7015	0	695	XP_019526009.1	clavesin-2-like%2C transcript variant X1	gene30126	0	695
ort000312	XP_001661892.2	RAB6-interacting golgin	gene6953	0	580	XP_019526012.1	RAB6-interacting golgin	gene30196	0	580
ort000313	XP_001653847.2	RNA 3'-terminal phosphate cyclase	gene6989	0	699	XP_019526013.1	RNA 3'-terminal phosphate cyclase-like	gene30154	0	699
ort000314	XP_021698776.1	mucin-5AC	gene6961	0	630	XP_019526016.1	mucin-5AC-like	gene30188	0	631
ort000315	XP_001661388.1	chymotrypsin-1	gene7074	9e-174	479	XP_019526019.1	chymotrypsin-2-like	gene30068	7e-174	479
ort000316	XP_001653878.2	uncharacterized LOC5572210	gene6965	0	582	XP_019526023.1	uncharacterized LOC109398116	gene30183	0	584
ort000317	XP_021698901.1	sodium channel protein Nach%2C transcript variant X1	gene7069	3e-155	437	XP_019526024.1	sodium channel protein Nach-like	gene30073	4e-155	437
ort000318	XP_021698861.1	uncharacterized LOC5566008%2C transcript variant X3	gene7032	7e-157	449	XP_019526026.1	protein PFC0760c-like	gene30109	6e-157	449
ort000319	XP_001651275.2	uncharacterized LOC5566904	gene18236	0	555	XP_019526027.1	uncharacterized LOC109398122	gene30201	0	555
ort000320	XP_021699955.1	ubiquinone biosynthesis protein COQ9%2C mitochondrial%2C transcript variant X1	gene7914	2e-169	486	XP_019526033.1	glomulin	gene30230	0	523
ort000321	XP_021712360.1	uncharacterized LOC110680878%2C transcript variant X2	gene18851	0	591	XP_019526036.1	uncharacterized LOC109398163	gene30235	0	591
ort000322	XP_001652052.1	programmed cell death protein 5	gene5310	2e-85	246	XP_019526037.1	programmed cell death protein 5-like	gene3385	1e-85	246
ort000323	XP_021699947.1	F-actin-uncapping protein LRRC16A%2C transcript variant X2	gene7907	0	1325	XP_019526039.1	F-actin-uncapping protein LRRC16A%2C transcript variant X3	gene30236	0	1301
ort000324	XP_001652053.1	nuclear envelope phosphatase-regulatory subunit 1 homolog	gene5311	4e-102	289	XP_019526044.1	nuclear envelope phosphatase-regulatory subunit 1 homolog	gene3386	3e-102	289
ort000325	XP_001660156.2	suppressor of cytokine signaling 6	gene7913	3e-158	445	XP_019526045.1	cytokine-inducible SH2-containing protein-like	gene30248	7e-154	433
ort000326	XP_021699942.1	scavenger receptor class B member 1%2C transcript variant X3	gene7905	0	1063	XP_019526049.1	scavenger receptor class B member 1%2C transcript variant X3	gene30258	0	1063
ort000327	XP_021694303.1	protein disulfide-isomerase TMX3-like	gene3147	0	568	XP_019526051.1	protein disulfide-isomerase TMX3-like	gene3387	0	567
ort000328	XP_021699940.1	scavenger receptor class B member 1%2C transcript variant X3	gene7905	0	1019	XP_019526052.1	scavenger receptor class B member 1%2C transcript variant X3	gene30258	0	1019
ort000329	XP_001659906.2	venom serine carboxypeptidase	gene4690	0	542	XP_019526055.1	vitellogenic carboxypeptidase-like	gene3389	0	542
ort000330	XP_001660149.2	uncharacterized LOC5572041	gene7902	5e-159	457	XP_019526057.1	uncharacterized LOC109398202	gene30272	2e-151	437
ort000331	XP_001660148.2	J domain-containing protein CG6693	gene7900	0	506	XP_019526058.1	J domain-containing protein CG6693-like	gene30273	5e-174	483
ort000332	XP_021699926.1	scavenger receptor class B member 1%2C transcript variant X8	gene7903	0	515	XP_019526059.1	platelet glycoprotein 4-like	gene30271	0	526
ort000333	XP_021693125.1	protein glass%2C transcript variant X4	gene3520	0	934	XP_019526062.1	protein glass-like	gene30280	0	934
ort000334	XP_021693090.1	flocculation protein FLO11%2C transcript variant X3	gene3499	0	706	XP_019526063.1	mucin-19-like	gene30290	0	627
ort000335	XP_021696652.1	uncharacterized LOC5568118%2C transcript variant X4	gene5313	0	593	XP_019526079.1	uncharacterized LOC109398212	gene3388	0	593
ort000336	XP_021693115.1	C-terminal-binding protein%2C transcript variant X15	gene3517	0	802	XP_019526082.1	C-terminal-binding protein%2C transcript variant X3	gene30277	0	802
ort000337	XP_001650869.2	BTB/POZ domain-containing protein KCTD3%2C transcript variant X1	gene3506	0	1555	XP_019526084.1	BTB/POZ domain-containing protein KCTD3-like	gene30285	0	1555
ort000338	XP_021693092.1	Werner syndrome ATP-dependent helicase-like	gene3507	0	1090	XP_019526085.1	Werner syndrome ATP-dependent helicase-like	gene30287	0	1090
ort000339	XP_001650870.1	28S ribosomal protein S11%2C mitochondrial	gene3505	9e-137	380	XP_019526086.1	28S ribosomal protein S11%2C mitochondrial-like	gene30286	6e-137	380
ort000340	XP_001650875.1	delta-1-pyrroline-5-carboxylate dehydrogenase%2C mitochondrial	gene3502	0	1159	XP_019526087.1	delta-1-pyrroline-5-carboxylate dehydrogenase%2C mitochondrial-like%2C transcript variant X1	gene30289	0	1159
ort000341	XP_001652058.1	U3 small nucleolar RNA-associated protein 4 homolog	gene5317	0	1303	XP_019526090.1	U3 small nucleolar RNA-associated protein 4 homolog	gene3391	0	1303
ort000342	XP_001650867.1	uncharacterized LOC5566480	gene3509	0	612	XP_019526092.1	uncharacterized protein B0303.4-like%2C transcript variant X2	gene30283	0	640
ort000343	XP_001650872.2	protein CREG1%2C transcript variant X1	gene3504	0	530	XP_019526093.1	protein CREG1-like%2C transcript variant X1	gene30288	0	530
ort000344	XP_001650873.2	protein CREG1%2C transcript variant X1	gene3504	2e-175	486	XP_019526094.1	protein CREG1-like%2C transcript variant X1	gene30288	1e-175	486
ort000345	XP_021712082.1	macrophage erythroblast attacher-like	gene18512	0	749	XP_019526095.1	macrophage erythroblast attacher-like	gene30276	0	749
ort000346	XP_021693094.1	uncharacterized LOC5566479	gene3510	0	1275	XP_019526096.1	uncharacterized LOC109398224	gene30282	0	1271
ort000347	XP_001660658.2	microsomal glutathione S-transferase 1	gene10156	3e-103	292	XP_019526098.1	microsomal glutathione S-transferase 1-like	gene30298	2e-103	292
ort000348	XP_001660657.2	cytochrome P450 4d2	gene10154	0	887	XP_019526099.1	cytochrome P450 4d1-like	gene30301	0	887
ort000349	XP_021702539.1	general odorant-binding protein 67	gene10145	2e-64	194	XP_019526102.1	general odorant-binding protein 67-like	gene30311	7e-65	194
ort000350	XP_001649648.2	uncharacterized LOC5565311	gene10143	1e-85	249	XP_019526103.1	uncharacterized LOC109398234	gene30313	3e-83	243
ort000351	XP_021697718.1	uncharacterized LOC110675946	gene10142	1e-25	94.4	XP_019526104.1	uncharacterized LOC109398235	gene30315	2e-25	94.4
ort000352	XP_021696655.1	protein FAM49B%2C transcript variant X1	gene5318	0	666	XP_019526106.1	protein FAM49B-like%2C transcript variant X1	gene3392	0	666
ort000353	XP_021705424.1	transcriptional regulator ATRX homolog%2C transcript variant X1	gene11547	0	2260	XP_019526109.1	transcriptional regulator ATRX homolog	gene30325	0	2350
ort000354	XP_001652059.2	protein FAM49B%2C transcript variant X1	gene5318	0	666	XP_019526111.1	protein FAM49B-like%2C transcript variant X1	gene3392	0	666
ort000355	XP_021710096.1	DNA-binding protein Ewg%2C transcript variant X2	gene11548	0	1167	XP_019526114.1	DNA-binding protein Ewg-like%2C transcript variant X3	gene30326	0	1167
ort000356	XP_021710097.1	DNA-binding protein Ewg%2C transcript variant X2	gene11548	0	556	XP_019526118.1	DNA-binding protein Ewg-like%2C transcript variant X3	gene30326	0	556
ort000357	XP_001652402.1	putative sodium-coupled neutral amino acid transporter 10	gene11546	0	1365	XP_019526123.1	putative sodium-coupled neutral amino acid transporter 10	gene30324	0	1365
ort000358	XP_001649650.1	homocysteine S-methyltransferase%2C transcript variant X2	gene10139	0	624	XP_019526125.1	homocysteine S-methyltransferase-like	gene30319	0	624
ort000359	XP_001660494.2	trans-1%2C2-dihydrobenzene-1%2C2-diol dehydrogenase	gene10150	0	663	XP_019526130.1	trans-1%2C2-dihydrobenzene-1%2C2-diol dehydrogenase-like	gene30305	0	663
ort000360	XP_021695222.1	uncharacterized LOC110675148	gene7036	0	881	XP_019526131.1	uncharacterized LOC109398263	gene30323	0	882
ort000361	XP_021703946.1	transport and Golgi organization protein 1%2C transcript variant X1	gene11408	0	1206	XP_019526141.1	transport and Golgi organization protein 1-like	gene30401	0	1227
ort000362	XP_021703943.1	uncharacterized LOC110677222	gene11407	0	682	XP_019526142.1	uncharacterized LOC109398277	gene30400	0	682
ort000363	XP_001656688.2	zinc finger protein 362	gene18320	6e-133	385	XP_019526154.1	early growth response protein 1-A-like	gene30346	6e-131	380
ort000364	XP_021703922.1	zinc finger protein 135%2C transcript variant X1	gene11388	0	897	XP_019526164.1	zinc finger protein 37-like	gene30382	0	888
ort000365	XP_001662128.2	UDP-glucuronosyltransferase 2B37	gene11409	0	1040	XP_019526168.1	UDP-glucuronosyltransferase 2B37-like%2C transcript variant X1	gene30402	0	1040
ort000366	XP_001652102.2	WD repeat-containing protein 75	gene11359	0	1885	XP_019526172.1	WD repeat-containing protein 75	gene30353	0	1897
ort000367	XP_021696661.1	pleckstrin homology domain-containing family G member 3	gene5326	0	2395	XP_019526174.1	uncharacterized LOC109398290%2C transcript variant X2	gene3400	0	2378
ort000368	XP_001652104.1	uncharacterized LOC5568167	gene11360	3e-54	163	XP_019526177.1	uncharacterized LOC109398295%2C transcript variant X3	gene30356	2e-54	163
ort000369	XP_021703959.1	transmembrane protein 87A%2C transcript variant X1	gene11418	0	1039	XP_019526180.1	transmembrane protein 87A-like%2C transcript variant X2	gene30413	0	1039
ort000370	XP_021703897.1	uncharacterized LOC5568178%2C transcript variant X4	gene11368	0	937	XP_019526186.1	sodium channel protein Nach-like%2C transcript variant X8	gene30364	0	957
ort000371	XP_021703878.1	spatacsin	gene11337	0	3286	XP_019526193.1	spatacsin-like	gene30331	0	3273
ort000372	XP_021703923.1	zinc finger protein 135%2C transcript variant X1	gene11388	0	1174	XP_019526195.1	zinc finger protein 595-like	gene30384	0	1162
ort000373	XP_001652133.2	ER membrane protein complex subunit 3	gene11393	0	520	XP_019526197.1	ER membrane protein complex subunit 3-like%2C transcript variant X2	gene30386	0	520
ort000374	XP_021703889.1	Krueppel-like factor 3	gene11355	0	736	XP_019526201.1	Krueppel-like factor 10	gene30348	0	763
ort000375	XP_001652108.2	uncharacterized LOC5568172	gene11364	0	739	XP_019526202.1	uncharacterized LOC109398309	gene30360	0	760
ort000376	XP_021696664.1	chondroitin sulfate N-acetylgalactosaminyltransferase 1%2C transcript variant X6	gene5329	0	1249	XP_019526207.1	chondroitin sulfate N-acetylgalactosaminyltransferase 1-like	gene3404	0	1249
ort000377	XP_001658708.2	zinc finger protein 879	gene11339	7e-168	479	XP_019526209.1	zinc finger protein 521-like	gene30335	5e-168	479
ort000378	XP_001652111.2	uncharacterized LOC5568175	gene11367	0	762	XP_019526217.1	uncharacterized LOC109398322	gene30363	0	762
ort000379	XP_021703961.1	uncharacterized LOC5575664	gene11419	0	647	XP_019526220.1	uncharacterized LOC109398324	gene30414	0	647
ort000380	XP_021703890.1	chromatin complexes subunit BAP18%2C transcript variant X1	gene11356	4e-116	329	XP_019526223.1	chromatin complexes subunit BAP18-like%2C transcript variant X1	gene30350	2e-119	337
ort000381	XP_001652100.2	chromatin complexes subunit BAP18%2C transcript variant X1	gene11356	5e-91	263	XP_019526224.1	chromatin complexes subunit BAP18-like%2C transcript variant X1	gene30350	4e-94	270
ort000382	XP_021703894.1	uncharacterized LOC5568169%2C transcript variant X2	gene11362	0	748	XP_019526225.1	uncharacterized LOC109398327	gene30358	0	748
ort000383	XP_021703947.1	uncharacterized LOC110677224	gene11413	9e-177	507	XP_019526228.1	uncharacterized LOC109398329	gene30408	5e-177	508
ort000384	XP_001652110.1	uncharacterized LOC5568174%2C transcript variant X2	gene11366	0	679	XP_019526230.1	uncharacterized LOC109398331	gene30362	0	679
ort000385	XP_021703891.1	zinc finger protein 700	gene11357	0	1011	XP_019526232.1	zinc finger protein 595-like	gene30351	0	1019
ort000386	XP_021703929.1	bromodomain-containing protein 4	gene11397	0	999	XP_019526236.1	basic-leucine zipper transcription factor A-like	gene30391	0	1074
ort000387	XP_021703962.1	uncharacterized LOC5575663	gene11420	0	603	XP_019526238.1	uncharacterized LOC109398343	gene30415	0	609
ort000388	XP_021703909.1	epsilon-sarcoglycan%2C transcript variant X3	gene11376	0	770	XP_019526241.1	epsilon-sarcoglycan-like%2C transcript variant X2	gene30369	0	787
ort000389	XP_021703915.1	zinc finger protein 420	gene11381	0	1610	XP_019526243.1	zinc finger protein 420-like	gene30377	0	1640
ort000390	XP_021696670.1	synaptobrevin%2C transcript variant X5	gene5330	8e-76	219	XP_019526244.1	synaptobrevin-like%2C transcript variant X2	gene3403	6e-76	219
ort000391	XP_021703905.1	uncharacterized LOC5568180	gene11371	5e-68	199	XP_019526248.1	uncharacterized LOC109398356	gene30365	4e-68	199
ort000392	XP_001663962.2	uncharacterized LOC5578571	gene3865	0	630	XP_019526253.1	uncharacterized LOC109398360%2C transcript variant X2	gene30418	0	633
ort000393	XP_021706484.1	tigger transposable element-derived protein 1-like	gene15662	2e-175	505	XP_019526262.1	tigger transposable element-derived protein 1-like	gene30476	1e-176	508
ort000394	XP_021697461.1	nucleic acid dioxygenase ALKBH1	gene1277	0	540	XP_019526265.1	nucleic acid dioxygenase ALKBH1-like	gene30487	0	510
ort000395	XP_021697721.1	uncharacterized LOC5574982%2C transcript variant X3	gene1306	0	2610	XP_019526269.1	nuclear pore complex protein DDB_G0274915-like%2C transcript variant X1	gene30445	0	2574
ort000396	XP_001655456.2	Y+L amino acid transporter 2	gene1305	0	1020	XP_019526271.1	Y+L amino acid transporter 2	gene30446	0	1020
ort000397	XP_021697792.1	serine hydroxymethyltransferase%2C cytosolic%2C transcript variant X4	gene1310	0	961	XP_019526296.1	serine hydroxymethyltransferase%2C cytosolic%2C transcript variant X2	gene30439	0	961
ort000398	XP_001655440.2	zinc finger and BTB domain-containing protein 49	gene1321	0	1066	XP_019526298.1	uncharacterized LOC109398404%2C transcript variant X1	gene30424	0	1057
ort000399	XP_001655466.1	60S ribosomal protein L10	gene1297	2e-164	452	XP_019526300.1	60S ribosomal protein L10	gene30460	2e-164	452
ort000400	XP_001664089.2	synaptic vesicle glycoprotein 2C%2C transcript variant X2	gene1285	0	1018	XP_019526304.1	synaptic vesicle glycoprotein 2A-like%2C transcript variant X3	gene30473	0	1017
ort000401	XP_001656158.2	serine-rich adhesin for platelets	gene1281	0	764	XP_019526306.1	uncharacterized LOC109398408	gene30477	0	771
ort000402	XP_021697499.1	galectin-3-binding protein A	gene1283	0	980	XP_019526307.1	BTB/POZ domain-containing protein 17	gene30474	0	980
ort000403	XP_001655444.2	dnaJ homolog subfamily C member 16	gene1316	0	1614	XP_019526308.1	dnaJ homolog subfamily C member 16-like	gene30434	0	1614
ort000404	XP_021697524.1	uncharacterized LOC5575005	gene1286	0	1314	XP_019526310.1	uncharacterized LOC109398411	gene30472	0	1314
ort000405	XP_011492970.2	ATP synthase subunit delta%2C mitochondrial	gene1313	6e-114	320	XP_019526311.1	ATP synthase subunit delta%2C mitochondrial	gene30436	4e-114	320
ort000406	XP_021697559.1	uncharacterized LOC5575001	gene1291	0	1229	XP_019526313.1	uncharacterized LOC109398413%2C transcript variant X1	gene30466	0	1229
ort000407	XP_001655474.2	perlucin-like protein	gene1292	4e-89	256	XP_019526315.1	perlucin-like protein	gene30468	5e-84	243
ort000408	XP_001655467.1	protein yippee	gene1296	8e-85	243	XP_019526317.1	protein yippee-like	gene30461	6e-85	243
ort000409	XP_021697768.1	zinc finger protein 91	gene1309	0	610	XP_019526322.1	transcription factor grauzone-like	gene30440	0	588
ort000410	XP_001655459.2	OTU domain-containing protein 6B	gene1304	0	511	XP_019526324.1	OTU domain-containing protein 6B-like	gene30448	0	519
ort000411	XP_021697492.1	non-homologous end-joining factor 1	gene1282	0	533	XP_019526332.1	non-homologous end-joining factor 1-like	gene30475	0	546
ort000412	XP_021697667.1	glutamate receptor ionotropic%2C kainate 2%2C transcript variant X5	gene1300	0	959	XP_019526335.1	glutamate receptor ionotropic%2C kainate 2-like%2C transcript variant X2	gene30459	0	967
ort000413	XP_001663642.2	seminal metalloprotease 1	gene16305	4e-120	342	XP_019526354.1	seminal metalloprotease 1	gene30504	2e-120	342
ort000414	XP_021693135.1	head peptide	gene3540	5e-23	86.7	XP_019526355.1	head peptide-like%2C transcript variant X1	gene30517	3e-23	86.7
ort000415	XP_021693201.1	catenin alpha%2C transcript variant X2	gene3553	0	1857	XP_019526376.1	catenin alpha%2C transcript variant X3	gene30533	0	1857
ort000416	XP_001657219.1	bolA-like protein DDB_G0274169	gene3551	7e-85	245	XP_019526383.1	bolA-like protein DDB_G0274169	gene30531	5e-85	245
ort000417	XP_021693132.1	uncharacterized LOC5566459	gene3534	0	2388	XP_019526387.1	uncharacterized LOC109398465	gene30510	0	2350
ort000418	XP_021693133.1	transcription factor SOX-4	gene3537	4e-57	172	XP_019526389.1	serine%2C glycine and glutamine-rich protein	gene11982	3e-49	152
ort000419	XP_001650838.1	probable salivary secreted peptide	gene3539	7e-78	225	XP_019526394.2	probable salivary secreted peptide	gene11981	5e-78	225
ort000420	XP_001657229.1	methionine aminopeptidase 1	gene3543	0	771	XP_019526395.1	methionine aminopeptidase 1	gene30521	0	771
ort000421	XP_001657231.1	zinc finger protein 593 homolog	gene3542	3e-108	306	XP_019526396.1	zinc finger protein 593 homolog	gene30520	5e-108	305
ort000422	XP_001657210.3	pyrokinin-1 receptor	gene3557	0	1120	XP_019526400.1	neuromedin-U receptor 1-like	gene30537	0	1135
ort000423	XP_021693211.1	dopamine receptor 1%2C transcript variant X1	gene3564	0	593	XP_019526401.1	dopamine receptor 1	gene30542	0	593
ort000424	XP_021693143.1	protoporphyrinogen oxidase%2C transcript variant X3	gene3546	0	886	XP_019526404.1	protoporphyrinogen oxidase	gene30523	0	886
ort000425	XP_001657223.1	bifunctional coenzyme A synthase	gene3548	0	949	XP_019526405.1	bifunctional coenzyme A synthase	gene30526	0	949
ort000426	XP_001657206.1	cytochrome P450 9e2	gene3560	0	935	XP_019526409.1	cytochrome P450 9e2-like	gene30540	0	935
ort000427	XP_001662780.1	uncharacterized LOC5576625	gene15818	9e-155	432	XP_019526417.1	uncharacterized LOC109398488	gene30551	8e-155	432
ort000428	XP_001662776.1	uncharacterized LOC5576621	gene19098	4e-157	438	XP_019526420.1	uncharacterized LOC109398492	gene30566	3e-157	438
ort000429	XP_001662782.1	uncharacterized LOC5576627	gene15816	1e-168	469	XP_019526423.1	uncharacterized LOC109398494	gene30553	8e-169	469
ort000430	XP_001660327.1	uncharacterized LOC5572368	gene15831	4e-96	275	XP_019526425.1	uncharacterized LOC109398496	gene30574	3e-96	275
ort000431	XP_001647794.2	uncharacterized LOC5579495	gene15819	2e-120	343	XP_019526427.1	uncharacterized LOC109398498	gene30554	2e-120	343
ort000432	XP_001662778.1	uncharacterized LOC5576623	gene19100	0	533	XP_019526429.1	uncharacterized LOC109398502	gene30557	0	554
ort000433	XP_001662779.1	uncharacterized LOC5576624	gene15821	1e-176	491	XP_019526433.1	uncharacterized LOC109398505	gene30556	3e-166	464
ort000434	XP_021706849.1	uncharacterized LOC5565029%2C transcript variant X2	gene15830	0	811	XP_019526435.1	uncharacterized LOC109398506%2C transcript variant X1	gene30571	0	811
ort000435	XP_021710956.1	uncharacterized LOC110679690	gene11615	7e-156	442	XP_019526436.1	uncharacterized LOC109398507	gene30573	5e-156	442
ort000436	XP_001662769.2	uncharacterized LOC5576615	gene15828	3e-161	448	XP_019526442.1	uncharacterized LOC109398513	gene30569	2e-161	448
ort000437	XP_001662771.2	uncharacterized LOC5576617	gene15826	6e-155	432	XP_019526446.1	uncharacterized LOC109398516	gene30567	8e-155	431
ort000438	XP_021706133.1	sialin%2C transcript variant X1	gene15834	0	668	XP_019526449.1	sialin-like	gene30578	0	645
ort000439	XP_001658071.1	PITH domain-containing protein GA19395	gene9578	2e-153	424	XP_019526456.1	PITH domain-containing protein GA19395-like	gene30590	1e-153	424
ort000440	XP_001659593.2	uncharacterized LOC5571214	gene9576	2e-99	285	XP_019526457.1	uncharacterized LOC109398528	gene30588	5e-98	281
ort000441	XP_001658075.2	collagenase	gene9575	2e-175	485	XP_019526462.1	collagenase	gene30586	4e-166	461
ort000442	XP_021703871.1	protein pelota	gene11334	0	596	XP_019526479.1	protein pelota	gene30601	0	596
ort000443	XP_021703874.1	uncharacterized LOC5569714%2C transcript variant X5	gene11335	2e-76	233	XP_019526481.1	putative protein TPRXL%2C transcript variant X1	gene30602	4e-71	220
ort000444	XP_001647579.2	trypsin-3	gene5324	1e-126	366	XP_019526485.1	trypsin 3A1-like	gene3398	8e-127	366
ort000445	XP_021694876.1	uncharacterized LOC110674802%2C transcript variant X2	gene363	5e-166	504	XP_019526490.1	uncharacterized LOC109398562	gene30620	2e-173	521
ort000446	XP_021693611.1	nucleotide exchange factor SIL1	gene3881	0	821	XP_019526499.1	protein THEM6-like%2C transcript variant X1	gene30637	0	821
ort000447	XP_021693613.1	protein THEM6%2C transcript variant X2	gene3880	9e-146	404	XP_019526500.1	protein THEM6-like%2C transcript variant X1	gene30637	7e-146	404
ort000448	XP_021693566.1	papilin%2C transcript variant X3	gene3843	0	4278	XP_019526503.1	papilin-like%2C transcript variant X3	gene30623	0	2548
ort000449	XP_021693563.1	papilin%2C transcript variant X3	gene3843	0	4494	XP_019526505.1	papilin-like%2C transcript variant X3	gene30623	0	2764
ort000450	XP_021693567.1	papilin%2C transcript variant X3	gene3843	0	3827	XP_019526506.1	papilin-like%2C transcript variant X3	gene30623	0	1619
ort000451	XP_021696596.1	uncharacterized LOC110675574	gene5268	6e-67	198	XP_019526507.1	uncharacterized LOC109398574	gene3344	4e-67	198
ort000452	XP_021693603.1	oxysterol-binding protein-related protein 8%2C transcript variant X10	gene3876	0	1907	XP_019526509.1	oxysterol-binding protein-related protein 8-like	gene30642	0	1903
ort000453	XP_021693606.1	endochitinase A%2C transcript variant X2	gene3877	0	784	XP_019526510.1	proteoglycan 4-like	gene30641	0	801
ort000454	XP_021693607.1	thioredoxin domain-containing protein 9	gene3878	1e-161	445	XP_019526511.1	thioredoxin domain-containing protein 9-like	gene30639	9e-162	445
ort000455	XP_021693616.1	facilitated trehalose transporter Tret1%2C transcript variant X3	gene3884	0	959	XP_019526513.1	facilitated trehalose transporter Tret1-like%2C transcript variant X2	gene30634	0	959
ort000456	XP_001660355.2	cuticle protein	gene3853	3e-131	374	XP_019526514.1	cuticle protein-like	gene30630	2e-135	384
ort000457	XP_001660357.1	larval cuticle protein A3A	gene3855	8e-115	329	XP_019526525.1	cuticle protein	gene30628	2e-122	348
ort000458	XP_001660358.1	larval cuticle protein A3A	gene3856	8e-144	401	XP_019526526.1	larval cuticle protein A3A-like	gene30627	6e-144	401
ort000459	XP_021701446.1	uncharacterized LOC5578768	gene9210	1e-155	473	XP_019526535.1	uncharacterized LOC109398601	gene30691	6e-160	485
ort000460	XP_001657134.1	uncharacterized LOC5578764%2C transcript variant X1	gene9213	0	900	XP_019526536.1	uncharacterized LOC109398602	gene30695	0	900
ort000461	XP_021701460.1	tRNA (adenine(58)-N(1))-methyltransferase non-catalytic subunit TRM6	gene9225	0	781	XP_019526550.1	tRNA (adenine(58)-N(1))-methyltransferase non-catalytic subunit TRM6	gene30699	0	781
ort000462	XP_001657125.1	E3 ubiquitin-protein ligase rnf146	gene9223	0	670	XP_019526551.1	E3 ubiquitin-protein ligase rnf146-like	gene30702	0	670
ort000463	XP_001657123.1	tRNA pseudouridine synthase-like 1	gene9224	0	643	XP_019526552.1	tRNA pseudouridine synthase-like 1	gene30700	0	643
ort000464	XP_021701456.1	uncharacterized LOC110676736	gene9221	2e-115	325	XP_019526553.1	uncharacterized LOC109398626	gene30704	1e-115	325
ort000465	XP_001657126.1	PHD finger-like domain-containing protein 5A	gene9222	4e-77	223	XP_019526554.1	PHD finger-like domain-containing protein 5A	gene30703	3e-77	223
ort000466	XP_021701434.1	zinc finger protein chinmo%2C transcript variant X3	gene9181	0	919	XP_019526558.1	zinc finger protein chinmo-like%2C transcript variant X5	gene30662	0	919
ort000467	XP_021701431.1	zinc finger protein chinmo%2C transcript variant X3	gene9181	0	919	XP_019526559.1	zinc finger protein chinmo-like%2C transcript variant X5	gene30662	0	919
ort000468	XP_021701433.1	zinc finger protein chinmo%2C transcript variant X3	gene9181	0	884	XP_019526561.1	zinc finger protein chinmo-like%2C transcript variant X5	gene30662	0	884
ort000469	XP_001657121.1	diphosphoinositol polyphosphate phosphohydrolase 1	gene9226	3e-147	409	XP_019526565.1	diphosphoinositol polyphosphate phosphohydrolase 1-like	gene30707	4e-143	399
ort000470	XP_001657137.1	nuclear distribution protein nudE homolog	gene9211	0	701	XP_019526566.1	nuclear distribution protein nudE homolog	gene30693	0	696
ort000471	XP_001657170.1	cytochrome b-c1 complex subunit Rieske%2C mitochondrial%2C transcript variant X2	gene9183	0	539	XP_019526567.1	cytochrome b-c1 complex subunit Rieske%2C mitochondrial%2C transcript variant X2	gene30666	0	539
ort000472	XP_011493198.1	cytochrome b-c1 complex subunit Rieske%2C mitochondrial%2C transcript variant X2	gene9183	3e-178	489	XP_019526568.1	cytochrome b-c1 complex subunit Rieske%2C mitochondrial%2C transcript variant X2	gene30666	2e-178	489
ort000473	XP_001652051.1	transcription elongation factor SPT4	gene5309	2e-83	239	XP_019526570.1	transcription elongation factor SPT4-like	gene3383	2e-83	239
ort000474	XP_001657163.2	PIN2/TERF1-interacting telomerase inhibitor 1%2C transcript variant X2	gene9186	3e-178	506	XP_019526574.1	PIN2/TERF1-interacting telomerase inhibitor 1-like%2C transcript variant X2	gene30671	0	513
ort000475	XP_001657128.2	X-ray repair cross-complementing protein 5	gene9218	0	1344	XP_019526576.1	X-ray repair cross-complementing protein 5-like	gene30706	0	1345
ort000476	XP_001657162.2	histone-lysine N-methyltransferase SMYD3	gene9187	0	855	XP_019526579.1	histone-lysine N-methyltransferase SMYD3-like%2C transcript variant X2	gene30672	0	855
ort000477	XP_001657146.2	zinc finger protein 2 homolog	gene9205	0	839	XP_019526587.1	gastrula zinc finger protein XlCGF26.1	gene30683	0	838
ort000478	XP_021701444.1	zinc finger protein 425	gene9204	0	1088	XP_019526588.1	zinc finger protein 425-like	gene30682	0	1049
ort000479	XP_001657167.2	protein TIPIN homolog%2C transcript variant X2	gene9184	1e-160	448	XP_019526589.1	protein TIPIN homolog	gene30668	1e-166	463
ort000480	XP_001657160.2	gastrula zinc finger protein XlCGF26.1	gene9189	0	672	XP_019526593.1	gastrula zinc finger protein XlCGF26.1-like	gene30673	0	671
ort000481	XP_021694267.1	uncharacterized LOC110674294	gene2445	0	587	XP_019526598.1	uncharacterized LOC109398674	gene30723	0	580
ort000482	XP_021701483.1	netrin receptor unc-5	gene9246	0	1093	XP_019526600.1	netrin receptor unc-5-like	gene30727	0	1087
ort000483	XP_021701488.1	LIM/homeobox protein Lhx9%2C transcript variant X2	gene9252	0	753	XP_019526602.1	LIM/homeobox protein Lhx9-like	gene30732	0	753
ort000484	XP_001658209.1	endocuticle structural glycoprotein SgAbd-5	gene9240	3e-70	205	XP_019526605.1	endocuticle structural glycoprotein SgAbd-5-like	gene30720	2e-70	205
ort000485	XP_001656323.1	intraflagellar transport protein 52 homolog	gene9266	0	868	XP_019526606.1	intraflagellar transport protein 52 homolog	gene30748	0	868
ort000486	XP_001658210.1	flexible cuticle protein 12	gene9239	3e-74	215	XP_019526607.1	flexible cuticle protein 12-like	gene30719	2e-74	215
ort000487	XP_021701497.1	interferon-inducible double-stranded RNA-dependent protein kinase activator A homolog%2C transcript variant X3	gene9260	0	729	XP_019526614.1	interferon-inducible double-stranded RNA-dependent protein kinase activator A homolog%2C transcript variant X1	gene30743	0	729
ort000488	XP_021701523.1	nicotinate phosphoribosyltransferase%2C transcript variant X2	gene9290	0	1226	XP_019526616.1	nicotinate phosphoribosyltransferase-like%2C transcript variant X1	gene30763	0	1243
ort000489	XP_021701487.1	uncharacterized LOC110676744	gene9251	5e-86	252	XP_019526621.1	uncharacterized LOC109398700	gene30731	5e-79	234
ort000490	XP_001662630.2	wiskott-Aldrich syndrome protein family member 2	gene9289	0	1227	XP_019526631.1	wiskott-Aldrich syndrome protein family member 3	gene30761	0	1227
ort000491	XP_021701517.1	luciferin 4-monooxygenase	gene9286	0	954	XP_019526633.1	luciferin 4-monooxygenase-like	gene30759	0	954
ort000492	XP_021701519.1	low density lipoprotein receptor adapter protein 1-A%2C transcript variant X2	gene9285	0	540	XP_019526634.1	low density lipoprotein receptor adapter protein 1-A%2C transcript variant X1	gene30758	0	539
ort000493	XP_021701513.1	out at first protein	gene9276	0	566	XP_019526639.1	out at first protein-like	gene30752	0	566
ort000494	XP_021701514.1	sialin	gene9279	0	1009	XP_019526640.1	sialin-like	gene30754	0	1009
ort000495	XP_021701509.1	cytochrome c oxidase subunit 4 isoform 1%2C mitochondrial%2C transcript variant X2	gene9273	3e-128	358	XP_019526641.1	cytochrome c oxidase subunit 4 isoform 1%2C mitochondrial	gene30750	2e-128	358
ort000496	XP_021701508.1	developmental protein eyes absent%2C transcript variant X1	gene9271	0	1373	XP_019526642.1	developmental protein eyes absent-like%2C transcript variant X2	gene30749	0	1373
ort000497	XP_021701465.1	proton-coupled amino acid transporter-like protein CG1139	gene9233	0	942	XP_019526646.1	proton-coupled amino acid transporter-like protein CG1139	gene30712	0	942
ort000498	XP_021701466.1	proton-coupled amino acid transporter-like protein CG1139%2C transcript variant X4	gene9234	0	896	XP_019526651.1	proton-coupled amino acid transporter-like protein CG1139%2C transcript variant X3	gene30713	0	896
ort000499	XP_001658212.1	m-AAA protease-interacting protein 1%2C mitochondrial	gene9236	0	523	XP_019526656.1	m-AAA protease-interacting protein 1%2C mitochondrial	gene30715	0	523
ort000500	XP_001662635.1	5-methylcytosine rRNA methyltransferase NSUN4	gene9280	0	929	XP_019526664.1	5-methylcytosine rRNA methyltransferase NSUN4	gene30755	0	929
ort000501	XP_021701485.1	probable methyltransferase BMT2 homolog	gene9249	0	598	XP_019526666.1	probable methyltransferase BMT2 homolog	gene30729	0	598
ort000502	XP_021701491.1	protein apterous%2C transcript variant X1	gene9253	0	936	XP_019526670.1	protein apterous-like	gene30734	0	936
ort000503	XP_001657868.2	uncharacterized LOC5579889	gene12405	0	581	XP_019526677.1	uncharacterized LOC109398744	gene30777	0	581
ort000504	XP_001657877.2	3-ketodihydrosphingosine reductase	gene12395	0	653	XP_019526683.1	3-ketodihydrosphingosine reductase	gene30765	0	653
ort000505	XP_021710255.1	methyl-CpG-binding domain protein 3%2C transcript variant X6	gene12396	4e-150	415	XP_019526685.1	methyl-CpG-binding domain protein 2-like%2C transcript variant X1	gene30766	3e-150	415
ort000506	XP_001657864.1	S-formylglutathione hydrolase	gene12408	0	572	XP_019526686.1	S-formylglutathione hydrolase	gene30780	0	572
ort000507	XP_001657873.2	metaxin-1 homolog%2C transcript variant X2	gene12397	0	627	XP_019526691.1	metaxin-1 homolog	gene30768	0	629
ort000508	XP_021710631.1	NADPH-dependent diflavin oxidoreductase 1%2C transcript variant X1	gene2590	0	797	XP_019526700.1	uncharacterized LOC109398762%2C transcript variant X2	gene30792	0	797
ort000509	XP_021707117.1	gustatory receptor for sugar taste 64a-like%2C transcript variant X1	gene14206	2e-141	396	XP_019526707.1	gustatory receptor for sugar taste 64a-like	gene30838	9e-142	396
ort000510	XP_001659399.2	uncharacterized LOC5570888%2C transcript variant X1	gene14205	5e-152	421	XP_019526716.1	uncharacterized LOC109398780	gene30837	4e-152	421
ort000511	XP_021706206.1	bromodomain-containing protein 3%2C transcript variant X15	gene14264	0	2138	XP_019526723.1	homeotic protein female sterile%2C transcript variant X3	gene30908	0	2191
ort000512	XP_021709465.1	uncharacterized LOC110679358	gene14316	9e-117	335	XP_019526728.1	uncharacterized LOC109398789	gene30873	6e-117	335
ort000513	XP_001660915.1	vacuolar protein sorting-associated protein 16 homolog%2C transcript variant X2	gene751	0	1675	XP_019526730.1	vacuolar protein sorting-associated protein 16 homolog%2C transcript variant X1	gene3436	0	1704
ort000514	XP_021708325.1	uncharacterized LOC5570887%2C transcript variant X12	gene14203	0	939	XP_019526738.1	uncharacterized LOC109398792%2C transcript variant X8	gene30833	0	935
ort000515	XP_021704951.1	sodium-dependent phosphate transporter 2%2C transcript variant X1	gene14177	0	1377	XP_019526745.1	sodium-dependent phosphate transporter 2-like%2C transcript variant X2	gene30808	0	1377
ort000516	XP_001651585.1	protein CLEC16A%2C transcript variant X1	gene14236	0	1941	XP_019526750.1	protein CLEC16A%2C transcript variant X4	gene30867	0	1945
ort000517	XP_001660913.1	zinc finger protein ubi-d4	gene753	0	607	XP_019526753.1	zinc finger protein DPF3	gene3437	0	585
ort000518	XP_001651586.1	DALR anticodon-binding domain-containing protein 3	gene14235	0	536	XP_019526755.1	DALR anticodon-binding domain-containing protein 3-like%2C transcript variant X2	gene30866	0	536
ort000519	XP_021710074.1	lamin Dm0	gene17124	0	1071	XP_019526758.1	lamin Dm0	gene365	0	1073
ort000520	XP_001651589.1	S-adenosylmethionine mitochondrial carrier protein homolog	gene14233	0	502	XP_019526761.1	S-adenosylmethionine mitochondrial carrier protein homolog	gene30864	0	504
ort000521	XP_001651583.1	splicing factor 3B subunit 6-like protein	gene14237	9e-92	261	XP_019526763.1	splicing factor 3B subunit 6-like protein	gene30868	6e-92	261
ort000522	XP_021708986.1	uncharacterized LOC110679190	gene14262	1e-50	155	XP_019526764.1	keratin-associated protein 16-1-like	gene30905	1e-50	155
ort000523	XP_001654737.1	3-oxoacyl-[acyl-carrier-protein] synthase%2C mitochondrial	gene14267	0	829	XP_019526802.1	3-oxoacyl-[acyl-carrier-protein] synthase%2C mitochondrial	gene30911	0	829
ort000524	XP_001654735.1	45 kDa calcium-binding protein	gene14269	0	634	XP_019526803.1	45 kDa calcium-binding protein-like	gene30913	0	634
ort000525	XP_001663344.1	40S ribosomal protein S3a	gene16172	0	555	XP_019526811.1	40S ribosomal protein S3a	gene30859	0	555
ort000526	XP_001651592.1	mitochondrial import inner membrane translocase subunit TIM14	gene14228	1e-81	235	XP_019526812.1	mitochondrial import inner membrane translocase subunit TIM14	gene30860	1e-81	235
ort000527	XP_001651574.2	leucine-rich repeat-containing protein 7	gene14248	0	519	XP_019526825.1	erbin-like	gene30887	0	519
ort000528	XP_021694311.1	uncharacterized LOC110674326	gene3368	2e-160	472	XP_019526828.1	uncharacterized LOC109398842	gene30878	9e-161	472
ort000529	XP_001663578.2	probable ATP-dependent RNA helicase DDX10	gene14214	0	1316	XP_019526834.1	probable ATP-dependent RNA helicase DDX10	gene30843	0	1280
ort000530	XP_001663581.2	DCN1-like protein%2C transcript variant X3	gene14217	0	583	XP_019526839.1	DCN1-like protein%2C transcript variant X2	gene30846	0	583
ort000531	XP_021704342.1	molybdenum cofactor synthesis protein cinnamon%2C transcript variant X2	gene14258	0	1141	XP_019526842.1	molybdenum cofactor synthesis protein cinnamon-like	gene30895	0	1141
ort000532	XP_001659794.1	galactosylgalactosylxylosylprotein 3-beta-glucuronosyltransferase I	gene14259	0	623	XP_019526843.1	galactosylgalactosylxylosylprotein 3-beta-glucuronosyltransferase I-like	gene30897	0	623
ort000533	XP_001652488.1	probable cytochrome P450 28a5	gene14184	0	921	XP_019526850.1	probable cytochrome P450 28a5	gene30812	0	921
ort000534	XP_021706430.1	GPALPP motifs-containing protein 1	gene14221	7e-43	149	XP_019526851.1	GPALPP motifs-containing protein 1	gene30851	4e-38	137
ort000535	XP_021705791.1	transcription initiation factor TFIID subunit 6%2C transcript variant X3	gene14176	0	1201	XP_019526854.1	transcription initiation factor TFIID subunit 6%2C transcript variant X3	gene30806	0	1201
ort000536	XP_021706205.1	DNA repair endonuclease XPF	gene14263	0	1903	XP_019526858.1	DNA repair endonuclease XPF-like	gene30907	0	1899
ort000537	XP_001663584.2	cyclin-C	gene14219	0	542	XP_019526869.1	cyclin-C	gene30849	0	542
ort000538	XP_001659393.1	ELMO domain-containing protein 2	gene14198	0	617	XP_019526875.1	ELMO domain-containing protein 2-like	gene30828	0	616
ort000539	XP_001656789.2	structural maintenance of chromosomes protein 2	gene17126	0	2360	XP_019526877.1	structural maintenance of chromosomes protein 2	gene367	0	2360
ort000540	XP_021710281.1	protein bride of sevenless%2C transcript variant X7	gene14180	0	1632	XP_019526878.1	protein bride of sevenless-like	gene30811	0	1650
ort000541	XP_021706429.1	cardioacceleratory peptide receptor	gene14192	0	1040	XP_019526882.1	cardioacceleratory peptide receptor-like	gene30820	0	1060
ort000542	XP_021705763.1	Kv channel-interacting protein 4%2C transcript variant X4	gene14173	0	617	XP_019526885.1	Kv channel-interacting protein 4-like%2C transcript variant X2	gene30803	0	594
ort000543	XP_001652499.1	Kv channel-interacting protein 4%2C transcript variant X4	gene14173	0	583	XP_019526886.1	Kv channel-interacting protein 4-like%2C transcript variant X2	gene30803	0	583
ort000544	XP_021707048.1	zinc finger protein 239-like%2C transcript variant X1	gene14172	0	895	XP_019526887.1	zinc finger protein 239	gene30802	0	886
ort000545	XP_021710270.1	serine-rich adhesin for platelets%2C transcript variant X7	gene14179	0	2172	XP_019526890.1	serine-rich adhesin for platelets-like%2C transcript variant X4	gene30810	0	2179
ort000546	XP_021710268.1	serine-rich adhesin for platelets%2C transcript variant X7	gene14179	0	2104	XP_019526891.1	serine-rich adhesin for platelets-like%2C transcript variant X4	gene30810	0	2140
ort000547	XP_021704977.1	single-pass membrane and coiled-coil domain-containing protein 4 homolog%2C transcript variant X2	gene14229	3e-37	118	XP_019526892.1	single-pass membrane and coiled-coil domain-containing protein 4 homolog	gene30862	2e-37	118
ort000548	XP_001652481.1	proclotting enzyme	gene14190	0	716	XP_019526894.1	proclotting enzyme-like%2C transcript variant X1	gene30819	0	716
ort000549	XP_001659394.1	uncharacterized LOC5570879	gene14199	2e-171	473	XP_019526899.1	uncharacterized LOC109398901	gene30829	1e-171	473
ort000550	XP_001659396.1	solute carrier family 35 member B1 homolog	gene14202	0	566	XP_019526901.1	solute carrier family 35 member B1 homolog	gene30831	0	526
ort000551	XP_021711319.1	mediator of RNA polymerase II transcription subunit 12%2C transcript variant X2	gene14938	0	3111	XP_019526904.1	mediator of RNA polymerase II transcription subunit 12-like%2C transcript variant X7	gene30917	0	3298
ort000552	XP_021711330.1	mediator of RNA polymerase II transcription subunit 12%2C transcript variant X2	gene14938	0	2845	XP_019526906.1	mediator of RNA polymerase II transcription subunit 12-like%2C transcript variant X7	gene30917	0	3058
ort000553	XP_001651512.1	multivesicular body subunit 12A	gene14939	0	594	XP_019526910.1	multivesicular body subunit 12B-like	gene30918	0	570
ort000554	XP_021711510.1	flap endonuclease 1	gene14949	0	767	XP_019526913.1	flap endonuclease 1	gene30927	0	767
ort000555	XP_001651506.2	CDK5 and ABL1 enzyme substrate 2	gene14947	0	1103	XP_019526914.1	CDK5 and ABL1 enzyme substrate 2-like	gene30925	0	1103
ort000556	XP_001651509.2	DNA mismatch repair protein Mlh1	gene14942	0	1263	XP_019526915.1	DNA mismatch repair protein Mlh1-like	gene30922	0	1243
ort000557	XP_001651507.1	arginine-hydroxylase NDUFAF5%2C mitochondrial	gene14946	0	630	XP_019526919.1	arginine-hydroxylase NDUFAF5%2C mitochondrial	gene30924	0	630
ort000558	XP_021706929.1	neuropeptide CCHamide-1 receptor	gene14951	0	911	XP_019526922.1	neuropeptide CCHamide-1 receptor-like%2C transcript variant X2	gene30929	0	911
ort000559	XP_021709953.1	RING finger protein 44%2C transcript variant X9	gene14022	0	1347	XP_019526928.1	RING finger protein 44-like%2C transcript variant X6	gene30942	0	1347
ort000560	XP_021706741.1	TATA element modulatory factor	gene786	0	1897	XP_019526941.1	TATA element modulatory factor-like	gene3443	0	1955
ort000561	XP_021710257.1	protein couch potato%2C transcript variant X6	gene14034	2e-180	495	XP_019526950.1	protein couch potato%2C transcript variant X2	gene30951	1e-180	495
ort000562	XP_021710998.1	regulating synaptic membrane exocytosis protein 1%2C transcript variant X2	gene14036	0	2364	XP_019526951.1	regulating synaptic membrane exocytosis protein 2-like	gene30956	0	2364
ort000563	XP_001656967.1	exostosin-3	gene14037	0	1906	XP_019526952.1	exostosin-3-like	gene30959	0	1906
ort000564	XP_001661192.2	tyrosine-protein kinase receptor torso	gene3358	0	1300	XP_019526959.1	tyrosine-protein kinase receptor torso-like	gene30976	0	1300
ort000565	XP_021692953.1	homeobox protein prospero%2C transcript variant X4	gene3370	0	1180	XP_019526966.1	homeobox protein prospero-like%2C transcript variant X2	gene30991	0	1197
ort000566	XP_001655940.2	dihydrolipoyllysine-residue succinyltransferase component of 2-oxoglutarate dehydrogenase complex%2C mitochondrial%2C transcript variant X2	gene3364	0	956	XP_019526968.1	dihydrolipoyllysine-residue succinyltransferase component of 2-oxoglutarate dehydrogenase complex%2C mitochondrial	gene30984	0	956
ort000567	XP_021713125.1	zinc finger protein 366	gene3018	0	741	XP_019526971.1	oocyte zinc finger protein XlCOF6-like	gene30969	0	741
ort000568	XP_021707463.1	sialin	gene17127	0	1108	XP_019526976.1	sialin	gene368	0	1108
ort000569	XP_021713128.1	uncharacterized LOC110681513	gene3020	0	539	XP_019526979.1	uncharacterized LOC109398983	gene30965	0	533
ort000570	XP_021694292.1	zinc finger protein 845-like	gene3017	0	730	XP_019526981.1	zinc finger protein 236-like	gene30970	0	728
ort000571	XP_001649031.3	chorion peroxidase-like	gene3400	0	1195	XP_019526984.1	chorion peroxidase-like	gene31018	0	1191
ort000572	XP_021706160.1	sortilin-related receptor	gene14925	0	4341	XP_019526989.1	sortilin-related receptor-like%2C transcript variant X2	gene3448	0	4357
ort000573	XP_021692978.1	uncharacterized LOC110674032	gene3382	3e-50	155	XP_019526990.1	uncharacterized LOC109398999	gene31001	2e-50	155
ort000574	XP_021692970.1	zinc finger FYVE domain-containing protein 9	gene3379	0	2333	XP_019526991.1	zinc finger FYVE domain-containing protein 9	gene30998	0	2356
ort000575	XP_021692979.1	centrosomal and chromosomal factor-like	gene3394	0	729	XP_019526995.2	centrosomal and chromosomal factor-like	gene1916	0	778
ort000576	XP_001649030.2	chorion peroxidase	gene3399	0	1424	XP_019526999.1	chorion peroxidase	gene31017	0	1424
ort000577	XP_021692994.1	chorion peroxidase	gene3397	0	1318	XP_019527000.1	chorion peroxidase	gene31016	0	1328
ort000578	XP_001659764.2	protein UXT	gene3381	7e-97	276	XP_019527001.1	protein UXT	gene30999	5e-97	276
ort000579	XP_021692996.1	follicle-stimulating hormone receptor	gene3401	0	1690	XP_019527003.1	thyrotropin receptor-like	gene31019	0	1690
ort000580	XP_021708504.1	spectrin beta chain	gene14922	0	4800	XP_019527004.1	spectrin beta chain-like%2C transcript variant X2	gene3449	0	4800
ort000581	XP_021693623.1	tigger transposable element-derived protein 2-like	gene529	2e-151	426	XP_019527009.1	jerky protein homolog-like	gene31036	1e-150	424
ort000582	XP_021713383.1	uncharacterized LOC5574692%2C transcript variant X1	gene3274	0	1771	XP_019527030.1	uncharacterized LOC109399053	gene31052	0	1797
ort000583	XP_021713382.1	TBC1 domain family member 22B%2C transcript variant X2	gene3273	0	997	XP_019527032.1	TBC1 domain family member 22B	gene31051	0	966
ort000584	XP_001651530.1	signal recognition particle receptor subunit alpha homolog	gene14921	0	1191	XP_019527034.1	signal recognition particle receptor subunit alpha homolog	gene3450	0	1196
ort000585	XP_021704840.1	nephrin%2C transcript variant X1	gene17051	0	2134	XP_019527037.1	nephrin-like	gene31113	0	2156
ort000586	XP_001657298.2	protein flightless-1	gene17026	0	2571	XP_019527054.1	protein flightless-1-like	gene31080	0	2571
ort000587	XP_021707932.1	DENN domain-containing protein 5A%2C transcript variant X7	gene17077	0	3034	XP_019527058.1	DENN domain-containing protein 5A%2C transcript variant X5	gene31139	0	3034
ort000588	XP_001656792.2	zinc carboxypeptidase	gene17129	0	807	XP_019527061.1	zinc carboxypeptidase-like	gene372	0	807
ort000589	XP_021707935.1	glycerol-3-phosphate phosphatase-like	gene17078	0	616	XP_019527062.1	glycerol-3-phosphate phosphatase-like	gene31140	0	616
ort000590	XP_001660161.1	glutamine--fructose-6-phosphate aminotransferase [isomerizing] 2	gene17076	0	1399	XP_019527063.1	glutamine--fructose-6-phosphate aminotransferase [isomerizing] 2-like	gene31138	0	1399
ort000591	XP_021706126.1	serine/threonine-protein kinase ULK2%2C transcript variant X1	gene17016	0	1477	XP_019527066.1	serine/threonine-protein kinase unc-51-like	gene31064	0	1481
ort000592	XP_021694473.1	sodium-dependent neutral amino acid transporter B(0)AT3%2C transcript variant X1	gene49	0	556	XP_019527076.1	sodium-dependent neutral amino acid transporter B(0)AT3-like%2C transcript variant X5	gene31103	0	556
ort000593	XP_001660169.1	40S ribosomal protein S7	gene17068	8e-140	388	XP_019527091.1	40S ribosomal protein S7	gene31125	6e-140	388
ort000594	XP_021711273.1	NF-kappa-B inhibitor-interacting Ras-like protein	gene17037	5e-160	441	XP_019527092.1	NF-kappa-B inhibitor-interacting Ras-like protein	gene31097	3e-160	441
ort000595	XP_001657313.2	dihydroceramide fatty acyl 2-hydroxylase FAH2%2C transcript variant X2	gene17038	0	628	XP_019527093.1	dihydroceramide fatty acyl 2-hydroxylase FAH2-like	gene31098	0	628
ort000596	XP_021704986.1	zinc finger protein 711	gene17045	0	1618	XP_019527096.1	zinc finger Y-chromosomal protein 2-like	gene31107	0	1658
ort000597	XP_001660167.1	zinc finger E-box-binding homeobox 1	gene17071	0	579	XP_019527104.1	zinc finger E-box-binding homeobox 1-like	gene31128	0	579
ort000598	XP_001657307.2	nucleolar MIF4G domain-containing protein 1 homolog	gene17035	0	1536	XP_019527105.1	nucleolar MIF4G domain-containing protein 1 homolog	gene31094	0	1570
ort000599	XP_001657314.2	uncharacterized LOC5579115	gene17039	0	509	XP_019527111.1	uncharacterized LOC109399118	gene31099	0	528
ort000600	XP_021708073.1	uncharacterized LOC5565730%2C transcript variant X1	gene14914	0	1216	XP_019527112.1	uncharacterized LOC109399122%2C transcript variant X4	gene3454	0	1221
ort000601	XP_001657288.2	defensin-C	gene17019	7e-61	181	XP_019527114.1	defensin-C	gene31067	5e-61	181
ort000602	XP_001660163.1	methylglutaconyl-CoA hydratase%2C mitochondrial	gene17074	0	586	XP_019527116.1	methylglutaconyl-CoA hydratase%2C mitochondrial	gene31135	0	586
ort000603	XP_021712776.1	gamma-aminobutyric acid receptor alpha-like	gene19391	0	567	XP_019527120.1	gamma-aminobutyric acid receptor alpha-like	gene31141	0	567
ort000604	XP_021709127.1	zinc finger protein 234	gene17072	2e-167	478	XP_019527121.1	zinc finger protein 235	gene31131	3e-167	478
ort000605	XP_021696285.1	protein bric-a-brac 1%2C transcript variant X4	gene5035	0	676	XP_019527123.1	protein bric-a-brac 1-like	gene31152	0	687
ort000606	XP_021696259.1	60S ribosomal protein L14	gene5009	4e-126	353	XP_019527127.1	60S ribosomal protein L14	gene31184	3e-126	353
ort000607	XP_001658801.2	uncharacterized LOC5569903	gene4995	8e-58	179	XP_019527128.1	uncharacterized LOC109399155	gene31196	8e-61	186
ort000608	XP_001658804.1	alpha-tocopherol transfer protein	gene4998	0	662	XP_019527129.1	alpha-tocopherol transfer protein-like	gene31194	0	662
ort000609	XP_021696266.1	larval cuticle protein 8-like	gene5017	7e-62	184	XP_019527133.1	flexible cuticle protein 12-like%2C transcript variant X1	gene31176	3e-54	164
ort000610	XP_021696258.1	clavesin-2	gene5005	0	593	XP_019527135.1	clavesin-1-like	gene31188	0	593
ort000611	XP_001658805.1	clavesin-1	gene4999	0	620	XP_019527136.1	clavesin-1-like	gene31193	0	620
ort000612	XP_001663706.1	flexible cuticle protein 12	gene5018	5e-64	189	XP_019527141.1	flexible cuticle protein 12-like	gene31175	3e-64	189
ort000613	XP_021696268.1	uncharacterized LOC110675468	gene5024	1e-31	108	XP_019527144.1	larval cuticle protein 8-like	gene31168	1e-31	108
ort000614	XP_021701506.1	endocuticle structural glycoprotein SgAbd-2	gene5027	8e-97	275	XP_019527146.1	endocuticle structural glycoprotein SgAbd-2-like	gene31165	6e-97	275
ort000615	XP_001661668.2	alpha-tocopherol transfer protein-like	gene5007	4e-140	395	XP_019527147.1	clavesin-2-like	gene31186	5e-140	395
ort000616	XP_001660252.2	PR domain zinc finger protein 13	gene5028	0	747	XP_019527148.1	zinc finger protein 333-like	gene31163	0	736
ort000617	XP_001661488.1	vacuolar protein sorting-associated protein 29	gene5034	9e-136	377	XP_019527149.1	vacuolar protein sorting-associated protein 29	gene31157	7e-136	377
ort000618	XP_001648818.1	luc7-like protein 3	gene15905	2e-106	312	XP_019527155.1	DNA topoisomerase 1-like	gene3464	3e-103	304
ort000619	XP_021696278.1	serine/threonine-protein phosphatase 6 regulatory subunit 3%2C transcript variant X11	gene5033	0	1833	XP_019527158.1	serine/threonine-protein phosphatase 6 regulatory subunit 3-like%2C transcript variant X9	gene31158	0	1846
ort000620	XP_021696288.1	aryl hydrocarbon receptor nuclear translocator-like protein 1%2C transcript variant X1	gene5039	0	1730	XP_019527161.1	aryl hydrocarbon receptor nuclear translocator homolog	gene31148	0	1774
ort000621	XP_021712817.1	translocation protein SEC63 homolog	gene19449	0	1531	XP_019527164.1	translocation protein SEC63 homolog	gene31199	0	1531
ort000622	XP_001660253.2	decaprenyl-diphosphate synthase subunit 2	gene5030	0	865	XP_019527165.1	decaprenyl-diphosphate synthase subunit 2	gene31162	0	842
ort000623	XP_001660260.2	protein bric-a-brac 2	gene5036	0	831	XP_019527167.1	protein bric-a-brac 1-like	gene31151	0	866
ort000624	XP_021696287.1	JNK-interacting protein 1	gene5038	0	944	XP_019527168.1	JNK-interacting protein 1-like	gene31150	0	944
ort000625	XP_001658802.1	clavesin-1	gene4996	0	652	XP_019527170.1	clavesin-1-like	gene31197	0	652
ort000626	XP_021696300.1	fatty acyl-CoA reductase wat	gene5045	0	996	XP_019527172.1	fatty acyl-CoA reductase wat-like	gene31145	0	996
ort000627	XP_021696286.1	tryptophan 5-hydroxylase 1	gene5037	0	1047	XP_019527179.1	tryptophan 5-hydroxylase 1-like%2C transcript variant X1	gene31149	0	1047
ort000628	XP_021696260.1	proline-rich extensin-like protein EPR1%2C transcript variant X1	gene5012	0	764	XP_019527182.1	proline-rich extensin-like protein EPR1%2C transcript variant X2	gene31179	0	766
ort000629	XP_001658803.1	clavesin-1	gene4997	0	664	XP_019527183.1	clavesin-1-like	gene31195	0	664
ort000630	XP_001661673.2	cytochrome P450 302a1%2C mitochondrial	gene5011	0	1029	XP_019527184.1	cytochrome P450 302a1%2C mitochondrial-like	gene31182	0	1029
ort000631	XP_001661669.2	clavesin-1	gene5008	0	575	XP_019527185.1	clavesin-2-like%2C transcript variant X2	gene31185	0	575
ort000632	XP_001661663.1	alpha-tocopherol transfer protein-like	gene5003	0	677	XP_019527187.1	alpha-tocopherol transfer protein-like	gene31190	0	677
ort000633	XP_001660265.2	fatty acyl-CoA reductase wat	gene5046	0	885	XP_019527190.1	fatty acyl-CoA reductase wat-like	gene31144	0	885
ort000634	XP_001661667.2	clavesin-2	gene5006	0	600	XP_019527191.1	clavesin-2-like	gene31187	0	581
ort000635	XP_021696254.1	mucin-5AC%2C transcript variant X2	gene4994	0	907	XP_019527194.1	cell surface glycoprotein 1-like	gene31198	0	942
ort000636	XP_021696239.1	hyccin	gene4984	0	729	XP_019527195.1	hyccin-like	gene31211	0	708
ort000637	XP_001654239.2	MIP18 family protein CG30152	gene4960	7e-113	318	XP_019527200.1	MIP18 family protein CG30152-like	gene31233	7e-112	316
ort000638	XP_001654248.2	uncharacterized LOC5572894	gene4969	3e-112	317	XP_019527201.1	uncharacterized LOC109399222	gene31226	2e-112	317
ort000639	XP_001654247.1	GTP-binding protein Rhes	gene4968	2e-178	490	XP_019527205.1	GTP-binding protein Rhes-like	gene31227	1e-178	490
ort000640	XP_021696240.1	trafficking protein particle complex subunit 3%2C transcript variant X2	gene4985	2e-127	364	XP_019527209.1	trafficking protein particle complex subunit 3-like%2C transcript variant X1	gene31209	4e-131	373
ort000641	XP_001658793.2	N-acetyltransferase 9-like protein	gene4987	1e-133	373	XP_019527211.1	N-acetyltransferase 9-like protein%2C transcript variant X2	gene31206	1e-133	373
ort000642	XP_021696244.1	transcription factor hamlet%2C transcript variant X3	gene4986	0	1181	XP_019527213.1	zinc finger protein 148-like	gene31208	0	1216
ort000643	XP_001654232.2	zinc finger protein 425	gene4952	6e-106	304	XP_019527218.1	zinc finger protein 425-like	gene31241	5e-106	304
ort000644	XP_021696194.1	lysozyme c-1%2C transcript variant X1	gene4953	1e-90	260	XP_019527219.1	lysozyme c-1-like	gene31239	1e-99	282
ort000645	XP_001654240.1	maternal protein exuperantia-2	gene4961	0	976	XP_019527227.1	maternal protein exuperantia-like	gene31232	0	938
ort000646	XP_001654238.1	protein fem-1 homolog B%2C transcript variant X1	gene4957	0	1298	XP_019527229.1	protein fem-1 homolog B-like%2C transcript variant X1	gene31234	0	1298
ort000647	XP_021696230.1	uncharacterized LOC5572895%2C transcript variant X1	gene4970	1e-100	287	XP_019527234.1	uncharacterized LOC109399249	gene31225	5e-94	270
ort000648	XP_001658795.2	Golgi reassembly-stacking protein 2	gene4990	0	936	XP_019527236.1	Golgi reassembly-stacking protein 1-like	gene31204	0	939
ort000649	XP_001654245.2	phosphoglycolate phosphatase 1B%2C chloroplastic	gene4964	1e-153	430	XP_019527238.1	phosphoglycolate phosphatase 2-like	gene31229	2e-153	429
ort000650	XP_001648260.1	uncharacterized LOC5563936	gene4974	7e-171	475	XP_019527249.1	uncharacterized LOC109399265	gene31218	2e-164	458
ort000651	XP_021696184.1	RNA polymerase II degradation factor 1%2C transcript variant X2	gene4944	0	724	XP_019527253.1	uncharacterized LOC109399270	gene31256	0	741
ort000652	XP_001648337.2	protein lin-37 homolog	gene4930	3e-124	352	XP_019527254.1	protein lin-37 homolog	gene31269	5e-125	354
ort000653	XP_001661152.1	EF-hand calcium-binding domain-containing protein 1	gene4927	8e-154	426	XP_019527261.1	EF-hand calcium-binding domain-containing protein 1-like	gene31272	6e-154	426
ort000654	XP_021702216.1	uncharacterized LOC110676896	gene4929	2e-94	269	XP_019527263.1	uncharacterized LOC109399282	gene31268	1e-94	269
ort000655	XP_021696173.1	tyrosine-protein kinase Src64B%2C transcript variant X4	gene4936	0	1119	XP_019527266.1	tyrosine-protein kinase Src64B-like%2C transcript variant X2	gene31263	0	1119
ort000656	XP_021696156.1	uncharacterized LOC5565109%2C transcript variant X2	gene4931	0	3268	XP_019527271.1	uncharacterized LOC109399288	gene31267	0	3201
ort000657	XP_021696186.1	RNA polymerase II degradation factor 1%2C transcript variant X2	gene4944	0	799	XP_019527273.1	uncharacterized LOC109399290	gene31257	0	803
ort000658	XP_001651434.2	cytochrome P450 4c21	gene13299	0	956	XP_019527275.1	cytochrome P450 4C1-like	gene31277	0	956
ort000659	XP_021706499.1	general odorant-binding protein 84a-like	gene13300	1e-62	189	XP_019527278.1	uncharacterized LOC109399298	gene31278	3e-61	185
ort000660	XP_001651429.2	odorant receptor 83a	gene13308	0	794	XP_019527279.1	odorant receptor 83a-like	gene31287	0	794
ort000661	XP_011493111.1	uncharacterized LOC23687641	gene13335	0	577	XP_019527281.1	uncharacterized LOC109399301	gene31295	0	588
ort000662	XP_001651430.1	uncharacterized LOC5567032	gene13307	9e-127	357	XP_019527282.1	uncharacterized LOC109399302	gene31286	3e-137	383
ort000663	XP_001651422.2	cytochrome P450 4c21	gene13313	0	899	XP_019527285.1	cytochrome P450 4c21-like	gene31294	0	899
ort000664	XP_001657842.2	zinc finger protein Xfin	gene14895	0	1050	XP_019527286.1	zinc finger protein 329-like	gene3488	0	1023
ort000665	XP_001651423.1	fructose-bisphosphate aldolase%2C transcript variant X1	gene13312	0	750	XP_019527289.1	fructose-bisphosphate aldolase-like%2C transcript variant X2	gene31292	0	750
ort000666	XP_021704239.1	glucose dehydrogenase [FAD%2C quinone]%2C transcript variant X3	gene13305	0	1250	XP_019527297.1	glucose dehydrogenase [FAD%2C quinone]-like	gene31282	0	1250
ort000667	XP_021704240.1	microfibril-associated glycoprotein 4-like	gene13306	0	535	XP_019527298.1	ficolin-1-like	gene31283	0	533
ort000668	XP_001657841.2	zinc finger protein 37 homolog	gene14894	0	817	XP_019527299.1	zinc finger and BTB domain-containing protein 17-like	gene3489	0	828
ort000669	XP_001651427.1	alpha-tocopherol transfer protein-like%2C transcript variant X1	gene13309	0	668	XP_019527300.1	alpha-tocopherol transfer protein-like%2C transcript variant X1	gene31288	0	668
ort000670	XP_021706909.1	odorant receptor coreceptor	gene13310	0	977	XP_019527302.1	odorant receptor coreceptor	gene31289	0	977
ort000671	XP_021705275.1	uncharacterized LOC5574821%2C transcript variant X2	gene13294	2e-104	298	XP_019527303.1	uncharacterized LOC109399319	gene31275	2e-108	308
ort000672	XP_011493113.2	uncharacterized LOC23687725	gene13334	0	674	XP_019527306.1	odorant receptor 7a-like	gene31322	0	674
ort000673	XP_001651347.1	uncharacterized LOC5566933	gene13322	4e-58	174	XP_019527311.1	uncharacterized LOC109399328	gene31313	3e-58	174
ort000674	XP_001651340.1	ejaculatory bulb-specific protein 3	gene13315	1e-86	248	XP_019527319.1	ejaculatory bulb-specific protein 3-like	gene31298	9e-87	248
ort000675	XP_001651343.1	ejaculatory bulb-specific protein 3	gene13318	7e-86	246	XP_019527323.1	ejaculatory bulb-specific protein 3-like	gene31304	5e-86	246
ort000676	XP_001651352.1	probable glutamate--tRNA ligase%2C mitochondrial	gene13327	0	1014	XP_019527325.1	probable glutamate--tRNA ligase%2C mitochondrial	gene31317	0	1014
ort000677	XP_001657837.1	serine/arginine-rich splicing factor 1A%2C transcript variant X1	gene14890	1e-167	462	XP_019527329.1	serine/arginine-rich splicing factor 1A%2C transcript variant X1	gene3492	9e-168	462
ort000678	XP_021710692.1	PDZ domain-containing protein 8%2C transcript variant X1	gene13338	0	1851	XP_019527330.1	PDZ domain-containing protein 8	gene31328	0	1873
ort000679	XP_021707259.1	uncharacterized LOC23687463%2C transcript variant X3	gene13331	0	713	XP_019527331.1	uncharacterized LOC109399349	gene31320	0	713
ort000680	XP_001651349.2	probable N-acetyltransferase san	gene13324	5e-119	336	XP_019527338.1	probable N-acetyltransferase san	gene31315	4e-119	336
ort000681	XP_021695211.1	protein pygopus-like	gene6338	1e-149	432	XP_019527348.1	homeobox protein Hox-B5-like	gene31360	2e-157	451
ort000682	XP_021697871.1	uncharacterized LOC5578595%2C transcript variant X1	gene6301	2e-85	246	XP_019527361.1	uncharacterized LOC109399380	gene31393	1e-85	246
ort000683	XP_001661737.2	lipase member H	gene6322	0	659	XP_019527364.1	lipase member H-like	gene31371	0	645
ort000684	XP_021697870.1	zinc metalloproteinase nas-7	gene6298	2e-178	493	XP_019527365.1	zinc metalloproteinase nas-7-like	gene31397	1e-178	493
ort000685	XP_021708297.1	asparagine synthetase domain-containing protein CG17486	gene14887	0	707	XP_019527369.1	asparagine synthetase domain-containing protein CG17486-like	gene3496	0	707
ort000686	XP_021697868.1	uncharacterized LOC23687578	gene6297	0	553	XP_019527370.1	uncharacterized LOC109399391	gene31398	0	553
ort000687	XP_021697902.1	uncharacterized LOC5575134%2C transcript variant X2	gene6347	0	1766	XP_019527371.1	uncharacterized LOC109399393%2C transcript variant X2	gene31352	0	1850
ort000688	XP_001657833.1	RNA cytidine acetyltransferase	gene14886	0	2037	XP_019527378.1	RNA cytidine acetyltransferase	gene3497	0	2037
ort000689	XP_021703014.1	neural-cadherin	gene10506	0	596	XP_019527382.1	DE-cadherin-like%2C transcript variant X3	gene31390	0	620
ort000690	XP_021697878.1	ATP-dependent RNA helicase DHX8	gene6313	0	2536	XP_019527385.1	ATP-dependent RNA helicase DHX8-like	gene31381	0	2536
ort000691	XP_001661731.2	mitochondrial ribonuclease P protein 1 homolog	gene6314	0	733	XP_019527386.1	mitochondrial ribonuclease P protein 1 homolog	gene31380	0	733
ort000692	XP_021711002.1	dmX-like protein 2%2C transcript variant X2	gene14885	0	6917	XP_019527390.1	dmX-like protein 2%2C transcript variant X1	gene3498	0	6917
ort000693	XP_001661734.1	eukaryotic translation initiation factor 2 subunit 2%2C transcript variant X2	gene6317	1e-170	478	XP_019527393.1	eukaryotic translation initiation factor 2 subunit 2-like	gene31376	5e-178	496
ort000694	XP_001655519.1	acetyl-coenzyme A synthetase	gene6360	0	1387	XP_019527395.1	acetyl-coenzyme A synthetase-like	gene31342	0	1387
ort000695	XP_001656318.2	pescadillo homolog	gene6364	0	1164	XP_019527396.1	pescadillo homolog	gene31338	0	1179
ort000696	XP_021697876.1	CD63 antigen%2C transcript variant X2	gene6310	0	613	XP_019527401.1	CD63 antigen-like	gene31384	0	613
ort000697	XP_021706822.1	SET and MYND domain-containing protein 4	gene17133	0	828	XP_019527403.1	uncharacterized LOC109399315%2C transcript variant X2	gene378	0	828
ort000698	XP_021697895.1	acyl-coenzyme A thioesterase 13-like	gene6324	2e-108	305	XP_019527404.1	acyl-coenzyme A thioesterase 13-like	gene31368	1e-108	305
ort000699	XP_001655512.2	multifunctional methyltransferase subunit TRM112-like protein	gene6349	2e-87	250	XP_019527411.1	multifunctional methyltransferase subunit TRM112-like protein	gene31350	2e-87	250
ort000700	XP_001655506.1	cysteine-rich venom protein 6	gene6342	1e-48	149	XP_019527416.1	cysteine-rich venom protein 6	gene31357	2e-46	144
ort000701	XP_001660911.1	dynein assembly factor 3%2C axonemal homolog	gene6311	0	859	XP_019527420.1	dynein assembly factor 3%2C axonemal homolog	gene31383	0	859
ort000702	XP_001660910.1	ragulator complex protein LAMTOR2 homolog	gene6312	2e-88	253	XP_019527421.1	ragulator complex protein LAMTOR2 homolog	gene31382	1e-88	253
ort000703	XP_021697914.1	chymotrypsin inhibitor%2C transcript variant X2	gene6358	4e-50	155	XP_019527425.1	chymotrypsin inhibitor-like	gene31347	3e-49	152
ort000704	XP_021698881.1	dentin sialophosphoprotein	gene7057	0	1078	XP_019527426.1	kinesin-like protein KIN-7M%2C chloroplastic	gene31404	0	1077
ort000705	XP_021698882.1	ester hydrolase C11orf54 homolog%2C transcript variant X1	gene7059	0	594	XP_019527427.1	ester hydrolase C11orf54 homolog	gene31405	0	594
ort000706	XP_001657829.2	uncharacterized LOC5568012	gene14883	3e-83	239	XP_019527429.1	uncharacterized LOC109399438%2C transcript variant X1	gene3499	3e-83	239
ort000707	XP_021698900.1	putative gustatory receptor 59f	gene7070	0	530	XP_019527430.1	putative gustatory receptor 59f	gene31415	0	530
ort000708	XP_001661378.2	homeobox protein MSH-B	gene7083	0	649	XP_019527439.1	homeobox protein HMX3-like	gene31431	0	649
ort000709	XP_001661319.1	cuticle protein 19	gene7113	7e-56	170	XP_019527442.1	larval cuticle protein A2B-like	gene31465	7e-69	203
ort000710	XP_001652162.2	cilia- and flagella-associated protein 251	gene7122	8e-171	478	XP_019527444.1	transcription factor SPT20 homolog	gene31473	6e-154	434
ort000711	XP_021698884.1	esterase B1%2C transcript variant X2	gene7060	0	1098	XP_019527449.1	acetylcholinesterase-like%2C transcript variant X5	gene31407	0	1099
ort000712	XP_021698920.1	importin-4	gene7097	0	2200	XP_019527462.1	importin-4-like	gene31447	0	2200
ort000713	XP_021698910.1	nuclear pore complex protein Nup160 homolog%2C transcript variant X1	gene7084	0	1193	XP_019527464.1	nuclear pore complex protein Nup160 homolog%2C transcript variant X1	gene31434	0	1216
ort000714	XP_021704732.1	uncharacterized LOC110677749	gene14879	0	894	XP_019527465.1	uncharacterized LOC109399456%2C transcript variant X3	gene3502	0	894
ort000715	XP_021698950.1	transient receptor potential cation channel trpm%2C transcript variant X6	gene7108	0	3726	XP_019527472.1	transient receptor potential cation channel trpm-like%2C transcript variant X4	gene31456	0	3726
ort000716	XP_021698931.1	uncharacterized LOC5566023	gene7104	0	1490	XP_019527477.1	uncharacterized LOC109399486%2C transcript variant X2	gene31453	0	1517
ort000717	XP_001654754.1	5-formyltetrahydrofolate cyclo-ligase	gene7106	7e-145	402	XP_019527478.1	5-formyltetrahydrofolate cyclo-ligase-like	gene31455	5e-145	402
ort000718	XP_001651249.2	cuticle protein 19	gene7131	6e-66	195	XP_019527497.1	cuticle protein 19-like	gene31483	4e-66	195
ort000719	XP_001661371.1	eukaryotic translation initiation factor 3 subunit E	gene7089	0	897	XP_019527499.1	eukaryotic translation initiation factor 3 subunit E	gene31439	0	897
ort000720	XP_021698917.1	DNA repair and recombination protein RAD54B	gene7094	0	1382	XP_019527500.1	DNA repair and recombination protein RAD54B%2C transcript variant X2	gene31444	0	1358
ort000721	XP_001661366.1	probable prefoldin subunit 4	gene7095	1e-93	267	XP_019527502.1	probable prefoldin subunit 4	gene31445	8e-94	267
ort000722	XP_021698928.1	protein ABHD1%2C transcript variant X5	gene7100	0	880	XP_019527505.1	protein ABHD1-like%2C transcript variant X4	gene31450	0	880
ort000723	XP_001654749.2	ribonucleoside-diphosphate reductase subunit M2%2C transcript variant X1	gene7099	0	796	XP_019527509.1	ribonucleoside-diphosphate reductase subunit M2	gene31449	0	796
ort000724	XP_011493552.2	3-ketoacyl-CoA thiolase%2C mitochondrial%2C transcript variant X1	gene7103	0	792	XP_019527511.1	3-ketoacyl-CoA thiolase%2C mitochondrial	gene31452	0	792
ort000725	XP_021698902.1	uncharacterized LOC5574355	gene7071	0	582	XP_019527514.1	ankyrin repeat and SOCS box protein 14-like	gene31417	0	582
ort000726	XP_001661381.1	uncharacterized LOC5574346	gene7080	0	1251	XP_019527516.1	nucleolar protein 11-like	gene31425	0	1248
ort000727	XP_021698911.1	alpha-1%2C3-mannosyl-glycoprotein 2-beta-N-acetylglucosaminyltransferase%2C transcript variant X1	gene7085	0	904	XP_019527517.1	alpha-1%2C3-mannosyl-glycoprotein 2-beta-N-acetylglucosaminyltransferase	gene31435	0	905
ort000728	XP_021698897.1	uncharacterized LOC5569059%2C transcript variant X2	gene7066	0	783	XP_019527522.1	uncharacterized LOC109399526%2C transcript variant X3	gene31413	0	777
ort000729	XP_021698899.1	lateral signaling target protein 2 homolog	gene7067	2e-86	248	XP_019527523.1	lateral signaling target protein 2 homolog	gene31414	2e-86	248
ort000730	XP_021698908.1	UPF0389 protein CG9231	gene7079	1e-107	304	XP_019527526.1	UPF0389 protein CG9231	gene31424	1e-101	289
ort000731	XP_021707852.1	uncharacterized LOC5570053%2C transcript variant X13	gene14876	0	645	XP_019527531.1	uncharacterized LOC109399531	gene3509	0	645
ort000732	XP_021698958.1	putative uncharacterized protein DDB_G0271606	gene7123	0	1097	XP_019527533.1	putative uncharacterized protein DDB_G0271606	gene31475	0	1100
ort000733	XP_001656776.1	NADH dehydrogenase [ubiquinone] 1 beta subcomplex subunit 1	gene17117	3e-34	110	XP_019527544.1	NADH dehydrogenase [ubiquinone] 1 beta subcomplex subunit 1	gene31559	2e-34	110
ort000734	XP_001656801.1	regulator of microtubule dynamics protein 1	gene17139	8e-152	422	XP_019527545.1	regulator of microtubule dynamics protein 1-like	gene31589	5e-152	422
ort000735	XP_021708290.1	neuropeptide Y receptor type 5	gene17121	0	841	XP_019527547.1	neuropeptide Y receptor type 5-like	gene31563	0	840
ort000736	XP_021704711.1	kin of IRRE-like protein 1%2C transcript variant X1	gene17064	1e-86	249	XP_019527548.1	irregular chiasm C-roughest protein-like	gene31498	1e-86	249
ort000737	XP_021709335.1	copper-transporting ATPase 1%2C transcript variant X4	gene17116	0	2367	XP_019527557.1	copper-transporting ATPase 1-like%2C transcript variant X5	gene31558	0	2367
ort000738	XP_021708353.1	heat shock 70 kDa protein 4%2C transcript variant X2	gene17101	0	1561	XP_019527563.1	heat shock 70 kDa protein 4-like%2C transcript variant X2	gene31542	0	1583
ort000739	XP_021710308.1	zinc finger protein OZF%2C transcript variant X2	gene17070	1e-150	433	XP_019527579.1	zinc finger protein 235-like%2C transcript variant X1	gene31507	7e-151	433
ort000740	XP_001660168.1	40S ribosomal protein S20	gene17069	2e-84	242	XP_019527584.1	40S ribosomal protein S20	gene31506	2e-84	242
ort000741	XP_011492952.2	farnesol dehydrogenase-like	gene17107	1e-163	452	XP_019527597.1	farnesol dehydrogenase-like	gene31549	1e-163	452
ort000742	XP_021704708.1	glucose-6-phosphate 1-dehydrogenase%2C transcript variant X2	gene17065	0	1098	XP_019527611.1	glucose-6-phosphate 1-dehydrogenase%2C transcript variant X1	gene31499	0	1098
ort000743	XP_001656772.1	sorting nexin lst-4	gene17114	0	1048	XP_019527616.1	sorting nexin lst-4	gene31556	0	1028
ort000744	XP_021709168.1	protein kinase C-binding protein NELL2%2C transcript variant X2	gene17095	0	1785	XP_019527617.1	protein kinase C-binding protein NELL2-like%2C transcript variant X4	gene31537	0	1843
ort000745	XP_001650415.2	DNA-binding protein D-ETS-4%2C transcript variant X1	gene17088	0	847	XP_019527624.1	DNA-binding protein D-ETS-4-like%2C transcript variant X2	gene31527	0	845
ort000746	XP_001656797.1	signal peptidase complex subunit 2	gene17135	5e-137	381	XP_019527625.1	signal peptidase complex subunit 2	gene380	4e-137	381
ort000747	XP_001656796.2	probable cGMP 3'%2C5'-cyclic phosphodiesterase subunit delta	gene17134	8e-110	311	XP_019527632.1	probable cGMP 3'%2C5'-cyclic phosphodiesterase subunit delta%2C transcript variant X1	gene31584	4e-110	311
ort000748	XP_001660162.2	probable phosphomannomutase	gene17075	0	511	XP_019527635.1	probable phosphomannomutase	gene31514	0	511
ort000749	XP_001650411.1	ER membrane protein complex subunit 10	gene17083	4e-157	435	XP_019527637.1	ER membrane protein complex subunit 10	gene31522	3e-157	435
ort000750	XP_001660170.1	glycosylphosphatidylinositol anchor attachment 1 protein	gene17066	0	1118	XP_019527639.1	glycosylphosphatidylinositol anchor attachment 1 protein	gene31501	0	1144
ort000751	XP_021706573.1	putative protein TPRXL	gene17090	3e-91	270	XP_019527641.1	putative protein TPRXL	gene31531	3e-88	262
ort000752	XP_001656798.1	regulator of microtubule dynamics protein 1	gene17136	0	537	XP_019527643.1	regulator of microtubule dynamics protein 1-like	gene31587	0	527
ort000753	XP_021705780.1	mucin-5AC%2C transcript variant X3	gene17103	0	1192	XP_019527646.1	mucin-5AC-like%2C transcript variant X4	gene31544	0	1248
ort000754	XP_021711772.1	uncharacterized LOC110680265	gene18127	0	525	XP_019527652.1	uncharacterized LOC109399615	gene31523	0	546
ort000755	XP_021705056.1	tetraspanin-11%2C transcript variant X2	gene17087	8e-174	478	XP_019527657.1	tetraspanin-11%2C transcript variant X3	gene31526	6e-174	478
ort000756	XP_001656800.1	regulator of microtubule dynamics protein 1	gene17138	1e-160	444	XP_019527661.1	regulator of microtubule dynamics protein 1-like	gene31588	8e-161	444
ort000757	XP_001650427.2	probable 39S ribosomal protein L23%2C mitochondrial	gene17099	2e-106	300	XP_019527663.1	probable 39S ribosomal protein L23%2C mitochondrial	gene31540	1e-106	300
ort000758	XP_021706798.1	zinc finger protein 227-like	gene17132	0	573	XP_019527669.1	zinc finger protein 572-like	gene31582	0	573
ort000759	XP_001650420.1	WW domain-binding protein 4	gene17093	0	619	XP_019527670.1	WW domain-binding protein 4-like	gene31535	0	620
ort000760	XP_021707455.1	uncharacterized LOC110678635	gene17144	1e-90	304	XP_019527681.1	uncharacterized LOC109399644	gene31594	4e-85	290
ort000761	XP_001662079.2	chymotrypsin-2	gene17185	2e-175	484	XP_019527685.1	chymotrypsin-2-like	gene31633	1e-175	484
ort000762	XP_021711079.1	carboxy-terminal domain RNA polymerase II polypeptide A small phosphatase 1	gene17158	0	503	XP_019527690.1	carboxy-terminal domain RNA polymerase II polypeptide A small phosphatase 1-like%2C transcript variant X3	gene31607	0	509
ort000763	XP_021710714.1	E3 ubiquitin-protein ligase mind-bomb%2C transcript variant X1	gene17169	0	2329	XP_019527699.1	E3 ubiquitin-protein ligase mind-bomb-like	gene31620	0	2329
ort000764	XP_001656815.1	ATPase inhibitor mai-2%2C mitochondrial	gene17157	1e-46	144	XP_019527704.1	ATPase inhibitor mai-2%2C mitochondrial%2C transcript variant X1	gene31606	3e-47	145
ort000765	XP_021708555.1	patatin-like phospholipase domain-containing protein 3%2C transcript variant X6	gene17176	0	1218	XP_019527707.1	patatin-like phospholipase domain-containing protein 3%2C transcript variant X4	gene31627	0	1235
ort000766	XP_001664114.2	phosphorylated CTD-interacting factor 1	gene17167	0	1512	XP_019527710.1	phosphorylated CTD-interacting factor 1%2C transcript variant X3	gene31618	0	1501
ort000767	XP_021705363.1	lipase maturation factor 2	gene17181	0	1141	XP_019527713.1	lipase maturation factor 2	gene31630	0	1143
ort000768	XP_001656822.2	uncharacterized LOC5578122%2C transcript variant X1	gene17162	0	1075	XP_019527715.1	uncharacterized LOC109399665%2C transcript variant X1	gene31611	0	1075
ort000769	XP_001656812.2	L-threonine 3-dehydrogenase%2C mitochondrial	gene17153	0	714	XP_019527717.1	L-threonine 3-dehydrogenase%2C mitochondrial	gene31602	0	729
ort000770	XP_001656811.1	uncharacterized LOC5578113	gene17151	2e-154	430	XP_019527718.1	uncharacterized LOC109399668	gene31601	3e-161	447
ort000771	XP_001664113.2	trafficking protein particle complex subunit 12	gene17166	0	881	XP_019527723.1	trafficking protein particle complex subunit 12-like	gene31617	0	881
ort000772	XP_001662072.2	T-related protein	gene17175	0	1055	XP_019527731.1	T-related protein-like	gene31626	0	1060
ort000773	XP_021709866.1	chymotrypsin-2	gene17187	2e-174	480	XP_019527732.1	chymotrypsin-2-like	gene31635	1e-174	480
ort000774	XP_021709867.1	chymotrypsin-2	gene17188	5e-175	482	XP_019527733.1	chymotrypsin-1-like	gene31636	4e-175	482
ort000775	XP_021709412.1	F-box/LRR-repeat protein 13%2C transcript variant X2	gene17172	0	1165	XP_019527737.1	F-box/LRR-repeat protein 2-like%2C transcript variant X2	gene31623	0	1165
ort000776	XP_001662071.2	F-box/LRR-repeat protein 7	gene17174	0	1186	XP_019527743.1	F-box/LRR-repeat protein 13-like	gene31625	0	1186
ort000777	XP_021708574.1	uncharacterized LOC5578903	gene17164	0	738	XP_019527744.1	uncharacterized LOC109399688	gene31614	0	738
ort000778	XP_021706105.1	leukocyte elastase inhibitor	gene12499	0	790	XP_019527746.1	uncharacterized LOC109399691	gene31656	0	789
ort000779	XP_001657114.1	uncharacterized LOC5578747	gene12513	0	650	XP_019527749.1	uncharacterized LOC109399694	gene31671	0	651
ort000780	XP_021704659.1	uncharacterized LOC110677736	gene1971	5e-161	459	XP_019527750.1	uncharacterized LOC109399695	gene31675	5e-161	459
ort000781	XP_001661479.2	uncharacterized LOC5574465	gene12524	1e-70	213	XP_019527751.1	uncharacterized LOC109399696	gene31682	2e-60	187
ort000782	XP_021708057.1	uncharacterized protein C1orf131 homolog	gene12710	9e-112	318	XP_019527755.1	uncharacterized protein C1orf131 homolog	gene31689	4e-109	311
ort000783	XP_001657110.2	titin homolog%2C transcript variant X2	gene12509	0	2044	XP_019527758.1	titin-like%2C transcript variant X2	gene31666	0	1988
ort000784	XP_021708968.1	zinc finger CCCH domain-containing protein 13%2C transcript variant X4	gene12484	0	1956	XP_019527762.1	zinc finger CCCH domain-containing protein 13-like	gene31647	0	1952
ort000785	XP_021704568.1	transcription factor mef2A%2C transcript variant X6	gene12703	0	1727	XP_019527763.1	myosin-G heavy chain-like%2C transcript variant X4	gene31697	0	1779
ort000786	XP_021709697.1	furin-like protease 1%2C transcript variant X1	gene12516	0	1811	XP_019527770.1	furin-like protease 1	gene31677	0	1798
ort000787	XP_021709699.1	cuticle protein 19.8	gene12520	1e-10	55.5	XP_019527771.1	cuticle protein 16.5-like	gene31679	5e-16	69.3
ort000788	XP_021709700.1	vitelline membrane protein Vm26Ab-like	gene12519	3e-31	105	XP_019527773.1	cuticle protein 38-like	gene31678	5e-14	61.6
ort000789	XP_021708385.1	laminin subunit beta-1%2C transcript variant X5	gene12506	0	3642	XP_019527777.1	laminin subunit beta-1%2C transcript variant X4	gene31663	0	3642
ort000790	XP_021707648.1	dual specificity mitogen-activated protein kinase kinase hemipterous%2C transcript variant X2	gene12706	0	1724	XP_019527778.1	dual specificity mitogen-activated protein kinase kinase hemipterous-like%2C transcript variant X1	gene31693	0	1660
ort000791	XP_021710528.1	period circadian protein%2C transcript variant X4	gene12691	0	2158	XP_019527791.1	period circadian protein-like	gene31707	0	2172
ort000792	XP_001656754.1	nucleolar complex protein 4 homolog A	gene12709	0	966	XP_019527792.1	nucleolar complex protein 4 homolog	gene31690	0	982
ort000793	XP_001656755.2	b(0%2C+)-type amino acid transporter 1%2C transcript variant X1	gene12708	0	1049	XP_019527794.1	b(0%2C+)-type amino acid transporter 1-like%2C transcript variant X1	gene31691	0	1049
ort000794	XP_001656747.2	coiled-coil domain-containing protein 115	gene12716	3e-104	295	XP_019527797.1	coiled-coil domain-containing protein 115-like	gene31685	2e-104	295
ort000795	XP_001661950.2	uncharacterized LOC5575435	gene12521	0	583	XP_019527809.1	coiled-coil domain-containing protein 51-like	gene31680	0	583
ort000796	XP_001657106.1	eukaryotic translation initiation factor 6	gene12501	4e-180	494	XP_019527810.1	eukaryotic translation initiation factor 6	gene31658	3e-180	494
ort000797	XP_021712794.1	39S ribosomal protein L17%2C mitochondrial-like	gene19417	3e-131	366	XP_019527811.1	39S ribosomal protein L17%2C mitochondrial	gene31698	3e-131	366
ort000798	XP_001657116.1	JNK1/MAPK8-associated membrane protein	gene12514	0	596	XP_019527812.1	JNK1/MAPK8-associated membrane protein-like	gene31673	0	596
ort000799	XP_021704575.1	FMRFamide receptor%2C transcript variant X1	gene12701	0	932	XP_019527820.1	FMRFamide receptor-like	gene31701	0	932
ort000800	XP_021705280.1	cell death protein hid	gene12487	4e-118	350	XP_019527821.1	cell death protein hid-like%2C transcript variant X1	gene31648	2e-127	374
ort000801	XP_001663734.2	elongation of very long chain fatty acids protein AAEL008004-like	gene12656	4e-170	471	XP_019527835.1	elongation of very long chain fatty acids protein AAEL008004-like	gene31751	3e-170	471
ort000802	XP_011493425.2	uncharacterized LOC23687957	gene12668	1e-155	443	XP_019527838.1	uncharacterized LOC109399796	gene31732	1e-152	436
ort000803	XP_011493168.2	hypoxia up-regulated protein 1	gene12662	0	1658	XP_019527839.1	hypoxia up-regulated protein 1	gene31739	0	1694
ort000804	XP_021699470.1	uncharacterized LOC5569546%2C transcript variant X2	gene7586	0	561	XP_019527845.1	uncharacterized LOC109399803%2C transcript variant X4	gene31743	0	561
ort000805	XP_021707813.1	uncharacterized LOC5565745	gene14910	0	1880	XP_019527848.1	uncharacterized LOC109399814	gene3472	0	1956
ort000806	XP_021711580.1	uncharacterized LOC110679873	gene11951	9e-90	277	XP_019527851.1	uncharacterized LOC109399822	gene31787	1e-89	277
ort000807	XP_021713071.1	uncharacterized LOC5580309%2C transcript variant X2	gene2966	4e-144	414	XP_019527856.1	uncharacterized LOC109399827	gene31847	2e-146	418
ort000808	XP_021713079.1	kinesin-like protein Klp98A%2C transcript variant X1	gene2984	0	2550	XP_019527871.1	kinesin-like protein Klp98A%2C transcript variant X2	gene31830	0	2521
ort000809	XP_001663804.1	ras-related protein rab7	gene3351	5e-157	433	XP_019527874.1	ras-related protein rab7-like%2C transcript variant X3	gene31800	4e-157	433
ort000810	XP_001654025.2	RING finger and transmembrane domain-containing protein 2%2C transcript variant X1	gene3014	0	1194	XP_019527876.1	flocculation protein FLO11	gene31803	0	1180
ort000811	XP_021713286.1	uncharacterized LOC5574046	gene3152	0	1101	XP_019527878.1	uncharacterized LOC109399845	gene31758	0	1090
ort000812	XP_021713075.1	matrix metalloproteinase-2	gene2969	0	1139	XP_019527884.1	matrix metalloproteinase-2-like	gene31844	0	1139
ort000813	XP_001662923.2	probable dolichyl pyrophosphate Glc1Man9GlcNAc2 alpha-1%2C3-glucosyltransferase	gene2970	0	967	XP_019527885.1	probable dolichyl pyrophosphate Glc1Man9GlcNAc2 alpha-1%2C3-glucosyltransferase	gene31843	0	967
ort000814	XP_001662922.1	probable insulin-like peptide 7	gene2971	4e-96	275	XP_019527886.1	probable insulin-like peptide 7	gene31835	8e-106	299
ort000815	XP_001662913.1	uncharacterized LOC5580286	gene2993	4e-165	468	XP_019527890.1	uncharacterized LOC109399855	gene31823	5e-164	465
ort000816	XP_001647666.2	polyserase-2	gene3163	0	1115	XP_019527893.1	polyserase-2-like	gene31765	0	1125
ort000817	XP_021713074.1	uncharacterized LOC5580307%2C transcript variant X2	gene2967	0	960	XP_019527896.1	uncharacterized LOC109399861%2C transcript variant X2	gene31845	0	960
ort000818	XP_001655027.1	WD40 repeat-containing protein SMU1	gene3150	0	1054	XP_019527897.1	WD40 repeat-containing protein SMU1-like	gene31755	0	1054
ort000819	XP_021713094.1	39S ribosomal protein L43%2C mitochondrial-like	gene2997	3e-133	371	XP_019527899.1	39S ribosomal protein L43%2C mitochondrial-like	gene31821	2e-133	371
ort000820	XP_001663803.2	homeotic protein empty spiracles	gene3350	0	705	XP_019527900.1	homeotic protein empty spiracles-like	gene31799	0	705
ort000821	XP_001662917.2	solute carrier family 25 member 45%2C transcript variant X2	gene2988	0	507	XP_019527904.1	solute carrier family 25 member 45-like%2C transcript variant X1	gene31828	0	507
ort000822	XP_001662164.1	zinc finger protein 691	gene3006	0	711	XP_019527905.1	zinc finger protein 865	gene31818	0	711
ort000823	XP_001654027.2	proclotting enzyme	gene3012	0	523	XP_019527906.1	proclotting enzyme-like	gene31806	0	523
ort000824	XP_001663802.2	homeotic protein empty spiracles	gene3349	0	608	XP_019527907.1	homeotic protein empty spiracles-like	gene31798	0	615
ort000825	XP_021713076.1	uncharacterized LOC5580295	gene2982	0	1098	XP_019527908.1	uncharacterized LOC109399876	gene31831	0	1080
ort000826	XP_021713120.1	serine protease 7	gene3013	1e-177	494	XP_019527909.1	serine protease 7-like	gene31804	0	520
ort000827	XP_001662921.2	glutamyl aminopeptidase	gene2981	0	1246	XP_019527910.1	aminopeptidase M1-like	gene31834	0	1232
ort000828	XP_021706161.1	uncharacterized LOC110678038%2C transcript variant X2	gene14898	1e-06	44.7	XP_019527916.1	uncharacterized LOC109399894%2C transcript variant X2	gene3485	8e-07	45.1
ort000829	XP_021713069.1	uncharacterized LOC5572587%2C transcript variant X1	gene2965	0	860	XP_019527919.1	uncharacterized LOC109399923	gene31851	0	869
ort000830	XP_001663109.2	28S ribosomal protein S24%2C mitochondrial	gene2923	5e-110	310	XP_019527923.1	28S ribosomal protein S24%2C mitochondrial	gene31897	4e-110	310
ort000831	XP_001656717.2	nucleolar protein 10	gene2933	0	1356	XP_019527934.1	nucleolar protein 10	gene31892	0	1356
ort000832	XP_021713035.1	rootletin%2C transcript variant X2	gene2946	0	4003	XP_019527935.1	rootletin%2C transcript variant X1	gene31867	0	4003
ort000833	XP_021713036.1	rootletin%2C transcript variant X2	gene2946	0	3865	XP_019527936.1	rootletin%2C transcript variant X1	gene31867	0	3865
ort000834	XP_001654102.2	uncharacterized LOC5572580	gene2949	0	1167	XP_019527937.1	uncharacterized LOC109399938	gene31871	0	1168
ort000835	XP_021713039.1	zinc finger and BTB domain-containing protein 17	gene2947	0	607	XP_019527938.1	zinc finger and SCAN domain-containing protein 12-like%2C transcript variant X1	gene31874	0	603
ort000836	XP_001654104.2	glutamyl-tRNA(Gln) amidotransferase subunit B%2C mitochondrial	gene2942	0	956	XP_019527940.1	glutamyl-tRNA(Gln) amidotransferase subunit B%2C mitochondrial	gene31875	0	956
ort000837	XP_001656720.1	glutamine synthetase 2 cytoplasmic%2C transcript variant X2	gene2931	0	753	XP_019527945.1	glutamine synthetase 2 cytoplasmic%2C transcript variant X2	gene31893	0	753
ort000838	XP_021713022.1	glutamine synthetase 2 cytoplasmic%2C transcript variant X2	gene2931	0	751	XP_019527947.1	glutamine synthetase 2 cytoplasmic%2C transcript variant X2	gene31893	0	751
ort000839	XP_001656721.1	beta-parvin	gene2928	0	732	XP_019527949.1	beta-parvin	gene31894	0	732
ort000840	XP_021713031.1	eukaryotic translation initiation factor 3 subunit D	gene2936	0	1261	XP_019527965.1	eukaryotic translation initiation factor 3 subunit D	gene31885	0	1261
ort000841	XP_001654109.2	protein penguin	gene2935	0	1220	XP_019527966.1	protein penguin	gene31888	0	1197
ort000842	XP_001654110.2	putative peptidyl-prolyl cis-trans isomerase dodo	gene2934	2e-117	328	XP_019527967.1	putative peptidyl-prolyl cis-trans isomerase dodo	gene31889	2e-117	328
ort000843	XP_001654105.1	DEAD-box helicase Dbp80%2C transcript variant X1	gene2940	0	1014	XP_019527968.1	DEAD-box helicase Dbp80	gene31881	0	1029
ort000844	XP_001652844.2	protein MMS22-like	gene15390	0	1185	XP_019527972.1	protein MMS22-like	gene31898	0	1159
ort000845	XP_021713032.1	isoleucine--tRNA ligase%2C mitochondrial	gene2937	0	1619	XP_019527973.1	isoleucine--tRNA ligase%2C mitochondrial	gene31884	0	1638
ort000846	XP_001654088.2	battenin	gene2964	0	843	XP_019527975.1	battenin-like	gene31852	0	844
ort000847	XP_021713066.1	putative uncharacterized protein DDB_G0287113	gene2960	6e-125	358	XP_019527977.1	PDZ and LIM domain protein 2-like%2C transcript variant X3	gene31860	7e-109	318
ort000848	XP_021713015.1	unconventional myosin-Ib%2C transcript variant X1	gene2922	0	2519	XP_019527980.1	unconventional myosin-Ib%2C transcript variant X2	gene31899	0	2519
ort000849	XP_011493264.2	putative odorant receptor 83c	gene14904	0	636	XP_019527982.1	putative odorant receptor 83c	gene3476	0	637
ort000850	XP_021713060.1	PDZ and LIM domain protein Zasp%2C transcript variant X7	gene2955	3e-140	411	XP_019527984.1	pinin-like%2C transcript variant X6	gene31863	4e-140	411
ort000851	XP_021713059.1	PDZ and LIM domain protein Zasp%2C transcript variant X7	gene2955	5e-161	462	XP_019527986.1	pinin-like%2C transcript variant X6	gene31863	5e-161	462
ort000852	XP_001656722.2	uncharacterized LOC5577982	gene2925	0	695	XP_019527988.1	uncharacterized LOC109399967%2C transcript variant X2	gene31895	0	702
ort000853	XP_001654106.2	zinc finger protein 62 homolog	gene2939	0	537	XP_019527990.1	GDNF-inducible zinc finger protein 1-like	gene31882	0	537
ort000854	XP_001654094.2	stress response protein NST1	gene2958	0	582	XP_019527992.1	stress response protein NST1-like	gene31862	0	550
ort000855	XP_021709287.1	potassium channel subfamily K member 10	gene14818	0	730	XP_019527999.1	potassium channel subfamily K member 2-like	gene3524	0	740
ort000856	XP_001649231.1	iron-sulfur cluster co-chaperone protein HscB%2C mitochondrial%2C transcript variant X2	gene14820	3e-146	407	XP_019528004.1	iron-sulfur cluster co-chaperone protein HscB%2C mitochondrial	gene3527	2e-146	407
ort000857	XP_021708993.1	uncharacterized LOC5571127%2C transcript variant X4	gene15484	0	560	XP_019528007.1	uncharacterized LOC109400002%2C transcript variant X2	gene32044	0	581
ort000858	XP_021708994.1	uncharacterized LOC5571127%2C transcript variant X4	gene15484	0	645	XP_019528008.1	uncharacterized LOC109400002%2C transcript variant X2	gene32044	0	666
ort000859	XP_001659543.2	protein HID1	gene15483	0	1706	XP_019528009.1	protein HID1	fgene19802	0	1706
ort000860	XP_021710968.1	uncharacterized LOC5571100%2C transcript variant X7	gene15474	0	550	XP_019528013.1	uncharacterized LOC109400004%2C transcript variant X1	gene32034	0	554
ort000861	XP_001649229.1	N-acetylglucosamine-6-sulfatase%2C transcript variant X2	gene14821	0	920	XP_019528017.1	N-acetylglucosamine-6-sulfatase-like	gene3528	0	920
ort000862	XP_001651796.1	eukaryotic translation initiation factor 3 subunit K	gene15473	4e-165	454	XP_019528018.1	eukaryotic translation initiation factor 3 subunit K	gene32028	3e-165	454
ort000863	XP_021709987.1	uncharacterized LOC5571095%2C transcript variant X3	gene15479	0	752	XP_019528019.1	uncharacterized LOC109400008%2C transcript variant X2	gene32036	0	779
ort000864	XP_021706118.1	chromobox protein homolog 1	gene14823	7e-131	365	XP_019528025.1	chromobox protein homolog 1	gene3529	5e-131	365
ort000865	XP_021711630.1	proteoglycan Cow%2C transcript variant X2	gene2686	0	738	XP_019528026.1	proteoglycan Cow	gene32059	0	738
ort000866	XP_021712762.1	uncharacterized LOC5567776	gene19371	0	1109	XP_019528038.1	uncharacterized LOC109400030	gene32166	0	1109
ort000867	XP_021703997.1	uncharacterized LOC110677233	gene1897	0	590	XP_019528041.1	uncharacterized LOC109400037	gene32109	0	592
ort000868	XP_021706045.1	uncharacterized protein CG3556	gene14828	0	1066	XP_019528043.1	uncharacterized protein CG3556-like	gene3533	0	1063
ort000869	XP_021711675.1	serine/threonine-protein phosphatase 4 regulatory subunit 3%2C transcript variant X7	gene2690	0	1659	XP_019528053.1	serine/threonine-protein phosphatase 4 regulatory subunit 3%2C transcript variant X4	gene32134	0	1705
ort000870	XP_001663482.1	uncharacterized LOC5577700	gene2691	6e-122	342	XP_019528055.1	uncharacterized LOC109400041	gene32133	5e-122	342
ort000871	XP_021711570.1	formin-like protein 5	gene2679	4e-106	310	XP_019528058.1	cytokinesis protein sepA-like	gene32053	3e-110	320
ort000872	XP_021711787.1	putative protein TPRXL	gene2706	5e-48	163	XP_019528067.1	probable serine/threonine-protein kinase dyrk2	gene32104	1e-27	109
ort000873	XP_001657688.2	claspin	gene2762	0	1759	XP_019528069.2	claspin-like	gene32001	0	1744
ort000874	XP_001657683.2	uncharacterized protein C7orf26 homolog	gene2766	0	731	XP_019528073.1	uncharacterized protein C7orf26 homolog%2C transcript variant X2	gene32139	0	731
ort000875	XP_001657684.2	ribosomal RNA-processing protein 7 homolog A	gene2765	6e-159	441	XP_019528074.1	ribosomal RNA-processing protein 7 homolog A	gene32140	4e-159	441
ort000876	XP_021712610.1	enolase-phosphatase E1	gene19177	0	816	XP_019528076.1	enolase-phosphatase E1	gene32066	0	861
ort000877	XP_001660551.2	MICOS complex subunit Mic60%2C transcript variant X1	gene2727	0	1292	XP_019528092.2	MICOS complex subunit Mic60%2C transcript variant X1	gene31954	0	1248
ort000878	XP_001660544.1	60S ribosomal protein L4	gene2702	0	866	XP_019528095.1	60S ribosomal protein L4	gene31962	0	866
ort000879	XP_001660542.1	pre-mRNA-splicing factor SPF27	gene2703	3e-153	424	XP_019528096.1	pre-mRNA-splicing factor SPF27	gene32102	2e-153	424
ort000880	XP_001658901.1	chorion transcription factor Cf2	gene14831	0	922	XP_019528097.1	chorion transcription factor Cf2	gene3546	0	883
ort000881	XP_021711667.1	cilia- and flagella-associated protein 36	gene2688	1e-152	429	XP_019528100.1	cilia- and flagella-associated protein 36	gene32060	4e-148	417
ort000882	XP_001656804.2	RNA-binding protein 24-A%2C transcript variant X5	gene17140	0	553	XP_019528101.1	RNA-binding protein 24-A-like%2C transcript variant X2	gene384	0	553
ort000883	XP_001656488.1	adenylosuccinate synthetase	gene2698	0	899	XP_019528107.1	adenylosuccinate synthetase	gene32121	0	899
ort000884	XP_001660547.2	exosome component 10%2C transcript variant X1	gene2724	0	1676	XP_019528108.1	exosome component 10	gene32098	0	1653
ort000885	XP_021711796.1	multidrug resistance-associated protein 9	gene2707	0	2282	XP_019528118.1	multidrug resistance-associated protein 9-like%2C transcript variant X1	gene32105	0	2311
ort000886	XP_021712150.1	uncharacterized LOC110680661%2C transcript variant X4	gene2754	0	1040	XP_019528120.1	uncharacterized LOC109400096%2C transcript variant X2	gene32071	0	1027
ort000887	XP_021712145.1	uncharacterized LOC110680661%2C transcript variant X4	gene2754	0	1040	XP_019528121.1	uncharacterized LOC109400096%2C transcript variant X2	gene32071	0	1027
ort000888	XP_021696577.1	protein arginine N-methyltransferase 1-like%2C transcript variant X3	gene5238	0	549	XP_019528122.1	protein arginine N-methyltransferase 1	gene32119	0	553
ort000889	XP_001658903.1	ubiquitin-conjugating enzyme E2 L3	gene14837	8e-113	317	XP_019528124.1	ubiquitin-conjugating enzyme E2 L3-like	gene3549	7e-113	317
ort000890	XP_001660557.1	GTP-binding protein SAR1	gene2733	3e-143	397	XP_019528129.1	GTP-binding protein SAR1	gene32090	2e-143	397
ort000891	XP_001660559.2	zinc finger protein 547	gene2736	0	570	XP_019528134.1	zinc finger protein 543-like	gene32085	0	570
ort000892	XP_001657704.2	uncharacterized LOC5567801	gene2745	0	636	XP_019528137.1	uncharacterized LOC109400109	gene32080	0	642
ort000893	XP_001656514.2	inorganic pyrophosphatase%2C transcript variant X1	gene2684	0	687	XP_019528139.1	inorganic pyrophosphatase%2C transcript variant X1	gene32057	0	688
ort000894	XP_021711914.1	zinc finger protein 2 homolog%2C transcript variant X1	gene2723	0	627	XP_019528143.1	zinc finger protein 26-like	gene32112	0	627
ort000895	XP_021712127.1	zinc finger protein 275%2C transcript variant X2	gene2751	0	736	XP_019528144.1	zinc finger protein 728-like%2C transcript variant X1	gene32073	0	736
ort000896	XP_021712123.1	zinc finger protein 275%2C transcript variant X2	gene2751	0	736	XP_019528145.1	zinc finger protein 728-like%2C transcript variant X1	gene32073	0	736
ort000897	XP_021712137.1	NADH dehydrogenase [ubiquinone] 1 alpha subcomplex subunit 6	gene2752	2e-89	255	XP_019528146.1	NADH dehydrogenase [ubiquinone] 1 alpha subcomplex subunit 6	gene32072	1e-89	255
ort000898	XP_021712000.1	U4/U6 small nuclear ribonucleoprotein Prp4-like	gene2732	0	1026	XP_019528149.2	U4/U6 small nuclear ribonucleoprotein Prp4	gene31952	0	1026
ort000899	XP_021711987.1	uncharacterized LOC5572728%2C transcript variant X2	gene2730	0	693	XP_019528153.1	golgin-45%2C transcript variant X2	gene32092	0	703
ort000900	XP_021708978.1	N-lysine methyltransferase KMT5A-B%2C transcript variant X1	gene14839	0	1017	XP_019528155.1	N-lysine methyltransferase KMT5A%2C transcript variant X2	gene3551	0	1017
ort000901	XP_001656516.2	xaa-Pro aminopeptidase ApepP	gene2683	0	1403	XP_019528157.1	xaa-Pro aminopeptidase 2	gene32056	0	1403
ort000902	XP_001657699.2	zinc finger protein 665	gene2750	0	908	XP_019528158.1	zinc finger protein 28-like	gene32076	0	921
ort000903	XP_021711436.1	uncharacterized LOC5577501	gene2670	0	1510	XP_019528159.2	uncharacterized LOC109400126	gene32047	0	1527
ort000904	XP_001652294.1	40S ribosomal protein S28	gene2712	1e-40	127	XP_019528162.1	40S ribosomal protein S28	gene31973	8e-41	127
ort000905	XP_021711599.1	lachesin%2C transcript variant X2	gene2682	0	710	XP_019528163.2	lachesin-like%2C transcript variant X2	gene31914	0	710
ort000906	XP_001656484.2	zinc finger imprinted 3	gene2720	0	996	XP_019528164.1	zinc finger protein 594-like	gene32117	0	1030
ort000907	XP_001658907.1	transmembrane emp24 domain-containing protein 2	gene14840	2e-145	404	XP_019528166.1	transmembrane emp24 domain-containing protein 2	gene3553	1e-145	404
ort000908	XP_021712193.1	fatty acid hydroxylase domain-containing protein 2%2C transcript variant X1	gene2756	0	509	XP_019528169.1	fatty acid hydroxylase domain-containing protein 2-like%2C transcript variant X1	gene32068	0	509
ort000909	XP_021712201.1	fatty acid hydroxylase domain-containing protein 2%2C transcript variant X1	gene2756	0	503	XP_019528170.1	fatty acid hydroxylase domain-containing protein 2-like%2C transcript variant X1	gene32068	0	503
ort000910	XP_001657692.1	single-stranded DNA-binding protein%2C mitochondrial	gene2759	1e-93	267	XP_019528171.2	single-stranded DNA-binding protein%2C mitochondrial	gene31922	1e-93	267
ort000911	XP_001652295.2	protein lin-37 homolog	gene2710	5e-134	375	XP_019528172.1	protein lin-37 homolog	gene31972	1e-132	372
ort000912	XP_001657682.1	4-coumarate--CoA ligase 1	gene2767	0	601	XP_019528174.1	4-coumarate--CoA ligase 1-like	gene32146	0	590
ort000913	XP_021700975.1	uncharacterized LOC5566254%2C transcript variant X1	gene8745	0	1253	XP_019528178.1	uncharacterized LOC109400159	gene32169	0	1253
ort000914	XP_001649696.2	myosin heavy chain%2C cardiac muscle isoform%2C transcript variant X2	gene8746	2e-128	366	XP_019528179.1	kinetochore protein SLK19-like	gene32168	1e-128	366
ort000915	XP_021697037.1	uncharacterized LOC110675696	gene8844	0	538	XP_019528183.1	uncharacterized LOC109400165	gene32191	0	546
ort000916	XP_001658909.2	39S ribosomal protein L18%2C mitochondrial	gene14842	5e-119	333	XP_019528185.1	39S ribosomal protein L18%2C mitochondrial-like	gene3555	4e-119	333
ort000917	XP_021694248.1	uncharacterized LOC110674281	gene1667	8e-106	311	XP_019528188.1	uncharacterized LOC109400169	gene32222	2e-106	312
ort000918	XP_021708202.1	28S ribosomal protein S10%2C mitochondrial	gene12625	5e-111	313	XP_019528190.1	28S ribosomal protein S10%2C mitochondrial-like	gene32210	4e-111	313
ort000919	XP_021707550.1	uncharacterized LOC5577692%2C transcript variant X3	gene12638	3e-179	492	XP_019528194.1	uncharacterized LOC109400178	gene32193	2e-179	492
ort000920	XP_001648613.2	uncharacterized LOC5564267%2C transcript variant X2	gene12647	4e-107	308	XP_019528197.1	uncharacterized LOC109400182	gene32181	2e-108	311
ort000921	XP_021704786.1	nuclear protein localization protein 4 homolog%2C transcript variant X2	gene12634	0	1305	XP_019528202.1	nuclear protein localization protein 4 homolog%2C transcript variant X2	gene32196	0	1305
ort000922	XP_001651780.1	uncharacterized LOC5567396	gene12630	6e-92	262	XP_019528205.1	uncharacterized LOC109400187	gene32204	5e-92	262
ort000923	XP_021708342.1	transcription factor E2f1%2C transcript variant X5	gene12649	0	804	XP_019528208.1	transcription factor E2f1%2C transcript variant X4	gene32177	0	955
ort000924	XP_001651784.1	proteasome subunit alpha type-2	gene12628	1e-176	484	XP_019528224.1	proteasome subunit alpha type-2	gene32207	1e-176	484
ort000925	XP_001648617.2	protein takeout%2C transcript variant X2	gene12645	0	516	XP_019528226.1	protein takeout-like	gene32183	0	516
ort000926	XP_001663470.2	protein takeout	gene12642	0	520	XP_019528228.1	protein takeout-like	gene32186	0	530
ort000927	XP_001651792.1	uncharacterized LOC5567390	gene12620	0	599	XP_019528229.1	uncharacterized LOC109400204%2C transcript variant X1	gene32219	0	594
ort000928	XP_021705925.1	uncharacterized LOC5577691	gene12639	8e-170	468	XP_019528231.1	uncharacterized LOC109400205	gene32192	6e-170	468
ort000929	XP_001651778.2	probable cytochrome P450 313a4	gene12633	0	696	XP_019528232.1	probable cytochrome P450 313a4	gene32199	0	696
ort000930	XP_021704160.1	optomotor-blind protein%2C transcript variant X7	gene14847	0	1405	XP_019528233.1	optomotor-blind protein%2C transcript variant X4	gene3558	0	1405
ort000931	XP_021706226.1	circadian clock-controlled protein%2C transcript variant X1	gene12641	2e-180	496	XP_019528234.1	protein takeout-like	gene32188	1e-180	496
ort000932	XP_001651790.1	Kv channel-interacting protein 1%2C transcript variant X2	gene12623	5e-154	425	XP_019528236.1	Kv channel-interacting protein 1-like	gene32214	4e-154	425
ort000933	XP_001658654.1	leucine-rich repeat-containing G-protein coupled receptor 4	gene13556	0	679	XP_019528239.1	carboxypeptidase N subunit 2-like	gene32184	0	665
ort000934	XP_021711871.1	uncharacterized LOC5576140	gene18238	0	568	XP_019528245.1	uncharacterized LOC109400222	gene32245	0	572
ort000935	XP_021693645.1	uncharacterized LOC5576566%2C transcript variant X1	gene3903	0	818	XP_019528246.1	uncharacterized LOC109400223	gene32246	0	853
ort000936	XP_021694422.1	protein chibby homolog 1	gene3927	1e-60	182	XP_019528258.1	protein chibby homolog 1-like	gene32227	1e-65	194
ort000937	XP_001650792.2	odorant receptor 4	gene3931	0	699	XP_019528259.1	odorant receptor 4-like	gene32225	0	699
ort000938	XP_021693640.1	serine-arginine protein 55%2C transcript variant X3	gene3896	6e-133	383	XP_019528261.1	serine-arginine protein 55-like%2C transcript variant X2	gene32256	3e-128	370
ort000939	XP_021693641.1	serine-arginine protein 55%2C transcript variant X3	gene3896	6e-95	270	XP_019528262.1	serine-arginine protein 55-like%2C transcript variant X2	gene32256	5e-95	270
ort000940	XP_021693642.1	serine-arginine protein 55%2C transcript variant X3	gene3896	2e-93	266	XP_019528264.1	serine-arginine protein 55-like%2C transcript variant X2	gene32256	1e-93	266
ort000941	XP_021693632.1	uncharacterized LOC110674144	gene3892	6e-49	152	XP_019528267.1	uncharacterized LOC109400245	gene32260	9e-42	133
ort000942	XP_021693662.1	zinc finger protein 271%2C transcript variant X3	gene3920	0	639	XP_019528269.1	zinc finger protein 32	gene32232	0	639
ort000943	XP_001663478.2	alkaline phosphatase%2C tissue-nonspecific isozyme	gene3914	0	1029	XP_019528286.1	alkaline phosphatase%2C tissue-nonspecific isozyme-like	gene32235	0	1029
ort000944	XP_021693559.1	protein fork head%2C transcript variant X2	gene3839	0	808	XP_019528295.1	protein fork head-like	gene32272	0	802
ort000945	XP_021693574.1	cuticle protein	gene3845	2e-137	383	XP_019528302.1	larval cuticle protein A2B-like%2C transcript variant X1	gene32267	1e-137	383
ort000946	XP_001650809.1	larval cuticle protein A2B	gene3844	3e-91	266	XP_019528306.1	larval cuticle protein A2B-like	gene32268	6e-89	260
ort000947	XP_001649697.1	cuticle protein 8	gene8748	1e-107	311	XP_019528317.1	cuticle protein 8-like	gene32356	5e-142	398
ort000948	XP_021708724.1	zinc finger CCCH domain-containing protein 18	gene14854	0	1006	XP_019528329.1	zinc finger CCCH domain-containing protein 18%2C transcript variant X2	gene3569	0	1034
ort000949	XP_001649737.1	PIH1 domain-containing protein 1	gene8795	0	689	XP_019528334.1	PIH1 domain-containing protein 1-like	gene32308	0	689
ort000950	XP_001649725.2	ornithine decarboxylase antizyme-like	gene8781	1e-176	485	XP_019528340.1	ornithine decarboxylase antizyme-like	gene32323	9e-177	485
ort000951	XP_021701023.1	metallo-beta-lactamase domain-containing protein 1%2C transcript variant X6	gene8800	3e-150	419	XP_019528348.1	metallo-beta-lactamase domain-containing protein 1-like	gene32297	2e-150	419
ort000952	XP_021700988.1	probable serine/threonine-protein kinase DDB_G0268078%2C transcript variant X7	gene8771	0	1451	XP_019528349.1	probable serine/threonine-protein kinase DDB_G0268078	gene32331	0	1453
ort000953	XP_001649721.2	enoyl-CoA delta isomerase 1%2C mitochondrial%2C transcript variant X2	gene8777	2e-170	473	XP_019528351.1	enoyl-CoA delta isomerase 1%2C mitochondrial-like%2C transcript variant X1	gene32327	2e-170	473
ort000954	XP_001649726.1	methionine aminopeptidase 2	gene8782	0	828	XP_019528365.1	methionine aminopeptidase 2B-like	gene32320	0	814
ort000955	XP_001649728.1	transcriptional activator hap3	gene8783	4e-133	370	XP_019528366.1	transcriptional activator hap3	gene32319	3e-133	370
ort000956	XP_001652754.1	testis-specific serine/threonine-protein kinase 6	gene8812	0	565	XP_019528369.1	testis-specific serine/threonine-protein kinase 6-like	gene32285	0	565
ort000957	XP_021700993.1	zinc finger protein 665%2C transcript variant X1	gene8787	0	1407	XP_019528370.1	zinc finger protein 665-like	gene32314	0	1402
ort000958	XP_011493383.1	translocon-associated protein subunit gamma	gene8817	4e-133	370	XP_019528372.1	translocon-associated protein subunit gamma-like	gene32279	3e-133	370
ort000959	XP_021695272.1	neurogenic protein big brain-like	gene8806	0	923	XP_019528379.1	neurogenic protein big brain	gene32290	0	923
ort000960	XP_001649724.2	enoyl-CoA delta isomerase 1%2C mitochondrial	gene8780	0	562	XP_019528382.1	enoyl-CoA delta isomerase 1%2C mitochondrial-like%2C transcript variant X3	gene32324	0	562
ort000961	XP_001649734.1	GTP-binding protein 10 homolog	gene8791	0	701	XP_019528385.1	GTP-binding protein 10 homolog	gene32313	0	702
ort000962	XP_021701050.1	STE20-related kinase adapter protein alpha	gene8818	0	639	XP_019528387.1	STE20-related kinase adapter protein alpha-like	gene32278	0	639
ort000963	XP_001649740.2	uncharacterized LOC5565376	gene8797	3e-121	348	XP_019528391.1	uncharacterized LOC109400348%2C transcript variant X2	gene32306	2e-121	348
ort000964	XP_001649704.1	larval cuticle protein A2B	gene8755	7e-65	194	XP_019528400.1	larval cuticle protein A2B-like	gene32348	5e-73	214
ort000965	XP_021701047.1	RNA polymerase II degradation factor 1	gene8815	0	607	XP_019528406.1	zinc finger protein 512B-like	gene32282	0	609
ort000966	XP_021704483.1	regulator of G-protein signaling loco%2C transcript variant X7	gene13431	0	2521	XP_019528413.1	regulator of G-protein signaling loco-like%2C transcript variant X4	gene32360	0	2526
ort000967	XP_021705036.1	cullin-5	gene13425	0	1608	XP_019528415.1	cullin-5-like	gene32368	0	1608
ort000968	XP_021705058.1	phospholipase A2 inhibitor%2C transcript variant X2	gene13423	0	762	XP_019528418.1	trophoblast glycoprotein-like	gene32371	0	762
ort000969	XP_001658322.1	COMM domain-containing protein 2%2C transcript variant X2	gene13427	3e-144	402	XP_019528421.1	COMM domain-containing protein 2-like	gene32365	2e-144	402
ort000970	XP_001658325.1	UPF0160 protein	gene13429	0	713	XP_019528422.1	UPF0160 protein	gene32363	0	713
ort000971	XP_021697601.1	protein wings apart-like%2C transcript variant X2	gene1294	0	2560	XP_019528431.1	protein wings apart-like	gene32381	0	2482
ort000972	XP_001655468.1	mitochondrial import inner membrane translocase subunit Tim9	gene1295	1e-63	187	XP_019528437.1	mitochondrial import inner membrane translocase subunit Tim9-like	gene32380	1e-63	187
ort000973	XP_001655473.2	lopap%2C transcript variant X1	gene1293	1e-162	451	XP_019528445.1	lopap-like%2C transcript variant X2	gene32383	2e-163	453
ort000974	XP_021694403.1	estrogen sulfotransferase	gene3201	0	661	XP_019528452.1	estrogen sulfotransferase	gene32407	0	661
ort000975	XP_021708270.1	prominin-1%2C transcript variant X5	gene17148	0	1711	XP_019528453.1	prominin-1-like%2C transcript variant X1	gene390	0	1652
ort000976	XP_021713319.1	protein phosphatase PP2A 55 kDa regulatory subunit%2C transcript variant X12	gene3196	0	921	XP_019528457.1	protein phosphatase PP2A 55 kDa regulatory subunit%2C transcript variant X4	gene32403	0	921
ort000977	XP_001657335.1	protein phosphatase PP2A 55 kDa regulatory subunit%2C transcript variant X12	gene3196	0	921	XP_019528458.1	protein phosphatase PP2A 55 kDa regulatory subunit%2C transcript variant X4	gene32403	0	921
ort000978	XP_021713311.1	uncharacterized LOC5578517	gene3190	0	700	XP_019528461.1	clathrin interactor 1%2C transcript variant X1	gene32394	0	728
ort000979	XP_001663910.1	partner of bursicon	gene3189	1e-108	306	XP_019528462.1	partner of bursicon	gene32395	8e-109	306
ort000980	XP_021713305.1	polypyrimidine tract-binding protein 2%2C transcript variant X12	gene3178	0	1143	XP_019528464.1	polypyrimidine tract-binding protein 2%2C transcript variant X3	gene32393	0	1143
ort000981	XP_021713323.1	protein Skeletor%2C isoforms B/C	gene3199	0	1431	XP_019528466.1	protein Skeletor%2C isoforms B/C	gene32406	0	1431
ort000982	XP_001657331.2	protein fem-1 homolog C	gene3200	0	1333	XP_019528468.1	protein fem-1 homolog C%2C transcript variant X1	gene32405	0	1333
ort000983	XP_001663907.2	TATA box-binding protein-associated factor RNA polymerase I subunit B	gene3194	0	1269	XP_019528470.1	TATA box-binding protein-associated factor RNA polymerase I subunit B	gene32397	0	1299
ort000984	XP_001657333.2	allantoicase	gene3198	0	741	XP_019528471.1	allantoicase-like	gene32404	0	741
ort000985	XP_021713324.1	uncharacterized LOC110681558	gene3202	0	1051	XP_019528472.1	uncharacterized LOC109400415	gene32408	0	1051
ort000986	XP_021713325.1	probable E3 ubiquitin-protein ligase HERC3	gene3204	0	590	XP_019528473.1	E3 ubiquitin-protein ligase HERC2	gene32411	0	590
ort000987	XP_001649374.1	ADP-ribosylation factor-like protein 3	gene3203	1e-128	358	XP_019528474.1	ADP-ribosylation factor-like protein 3	gene32410	1e-128	358
ort000988	XP_001663906.2	RISC-loading complex subunit tarbp2	gene3195	5e-80	244	XP_019528476.1	interferon-inducible double-stranded RNA-dependent protein kinase activator A homolog%2C transcript variant X1	gene32399	1e-71	223
ort000989	XP_001659819.2	lectin subunit alpha	gene3179	2e-94	271	XP_019528477.1	perlucin-like	gene32424	2e-94	271
ort000990	XP_001663159.2	uncharacterized LOC5577059	gene3090	5e-154	436	XP_019528500.1	uncharacterized LOC109400450	gene32527	3e-148	421
ort000991	XP_021694399.1	protein D3-like	gene3095	3e-169	466	XP_019528504.1	protein D3-like%2C transcript variant X2	gene32519	2e-169	466
ort000992	XP_021713276.1	tachykinin-like peptides receptor 86C	gene3132	0	523	XP_019528512.1	tachykinin-like peptides receptor 86C	gene32465	0	523
ort000993	XP_021713284.1	uncharacterized LOC5574048	gene3151	0	748	XP_019528517.1	uncharacterized LOC109400469%2C transcript variant X7	gene32451	0	765
ort000994	XP_001655038.2	protein Aatf	gene3139	0	675	XP_019528523.1	protein Aatf	gene32463	0	679
ort000995	XP_001658928.1	uncharacterized LOC5570039%2C transcript variant X2	gene14860	3e-68	201	XP_019528525.1	toxin-like protein 14%2C transcript variant X2	gene3582	2e-68	201
ort000996	XP_021713279.1	uncharacterized LOC5574056	gene3142	0	1683	XP_019528537.1	uncharacterized LOC109400479	gene32459	0	1687
ort000997	XP_021713250.1	prolyl 3-hydroxylase sudestada1%2C transcript variant X2	gene3109	0	999	XP_019528542.1	prolyl 3-hydroxylase sudestada1-like%2C transcript variant X2	gene32502	0	1030
ort000998	XP_001658930.1	uncharacterized LOC5570040	gene14861	4e-64	190	XP_019528544.1	uncharacterized LOC109400483	gene3583	3e-64	190
ort000999	XP_001652779.2	uncharacterized LOC5569224	gene3108	8e-92	264	XP_019528545.1	uncharacterized LOC109400486	gene32503	7e-83	241
ort001000	XP_001652782.1	calcineurin B homologous protein 1	gene3110	2e-138	384	XP_019528546.1	calcineurin B homologous protein 1-like	gene32501	1e-138	384
ort001001	XP_021713205.1	uncharacterized LOC23687519	gene3079	0	749	XP_019528547.1	uncharacterized LOC109400488	gene32538	0	749
ort001002	XP_021713293.1	uncharacterized LOC5574044	gene3159	0	1845	XP_019528549.1	uncharacterized LOC109400490	gene32449	0	1819
ort001003	XP_021713207.1	DNA-binding protein Ets97D	gene3082	0	870	XP_019528550.1	DNA-binding protein Ets97D	gene32534	0	916
ort001004	XP_001656809.1	caspase	gene17149	0	551	XP_019528553.1	caspase-like	gene391	0	551
ort001005	XP_001655028.1	transmembrane protein 235	gene3149	0	608	XP_019528555.1	transmembrane protein 235	gene32453	0	608
ort001006	XP_021713260.1	wolframin	gene3118	0	1750	XP_019528556.1	wolframin-like	gene32491	0	1740
ort001007	XP_021713206.1	uncharacterized LOC5566035%2C transcript variant X2	gene3080	0	781	XP_019528557.1	uncharacterized LOC109400497%2C transcript variant X2	gene32533	0	811
ort001008	XP_001652791.2	GDP-fucose transporter 1	gene3119	0	627	XP_019528559.1	GDP-fucose transporter 1-like	gene32490	0	627
ort001009	XP_021712263.1	TBC1 domain family member 7	gene18730	0	523	XP_019528560.1	TBC1 domain family member 7	gene32489	0	523
ort001010	XP_001655031.2	carbonic anhydrase 2%2C transcript variant X2	gene3145	0	741	XP_019528563.1	carbonic anhydrase 2%2C transcript variant X2	gene32456	0	741
ort001011	XP_021713295.1	zinc finger protein 853	gene3160	0	944	XP_019528568.1	zinc finger protein 865-like%2C transcript variant X2	gene32448	0	907
ort001012	XP_001652800.2	2%2C3-bisphosphoglycerate-dependent phosphoglycerate mutase%2C transcript variant X2	gene3128	1e-159	442	XP_019528573.1	2%2C3-bisphosphoglycerate-dependent phosphoglycerate mutase-like%2C transcript variant X1	gene32479	6e-169	466
ort001013	XP_001652801.2	2%2C3-bisphosphoglycerate-dependent phosphoglycerate mutase%2C transcript variant X2	gene3128	2e-157	436	XP_019528574.1	2%2C3-bisphosphoglycerate-dependent phosphoglycerate mutase-like%2C transcript variant X1	gene32479	1e-166	460
ort001014	XP_021713234.1	protein D3%2C transcript variant X1	gene3096	1e-151	421	XP_019528580.1	protein D3-like%2C transcript variant X2	gene32518	1e-151	421
ort001015	XP_001661542.1	protein D3%2C transcript variant X1	gene3096	1e-151	421	XP_019528582.1	protein D3-like%2C transcript variant X2	gene32518	1e-151	421
ort001016	XP_021694302.1	mucin-5AC	gene3107	0	1171	XP_019528583.1	mucin-5AC-like	gene32504	0	1102
ort001017	XP_021713256.1	uncharacterized LOC5567331%2C transcript variant X1	gene3115	1e-132	380	XP_019528585.1	uncharacterized LOC109400522	gene32494	9e-130	373
ort001018	XP_021713296.1	zinc finger protein 148-like	gene3161	0	528	XP_019528594.1	zinc finger protein 148-like	gene32447	0	535
ort001019	XP_021697832.1	dual 3'%2C5'-cyclic-AMP and -GMP phosphodiesterase 11	gene6273	0	1671	XP_019528599.1	uncharacterized LOC109400568	gene32575	0	1671
ort001020	XP_021697811.1	uncharacterized LOC110675968	gene6250	1e-104	296	XP_019528607.1	uncharacterized LOC109400576	gene32549	9e-105	296
ort001021	XP_001648814.1	uncharacterized LOC5564471	gene6249	2e-111	314	XP_019528609.1	uncharacterized LOC109400579	gene32548	2e-111	314
ort001022	XP_021700628.1	uncharacterized LOC110676559	gene8416	2e-84	246	XP_019528621.1	uncharacterized LOC109400591	gene32550	2e-84	246
ort001023	XP_021697812.1	uncharacterized LOC110675969	gene6253	2e-98	281	XP_019528623.1	uncharacterized LOC109400592	gene32554	9e-94	269
ort001024	XP_021697831.1	ankyrin repeat domain-containing protein 11	gene6270	0	1204	XP_019528626.1	ankyrin repeat domain-containing protein 11-like%2C transcript variant X4	gene32568	0	1194
ort001025	XP_021697816.1	nuclear hormone receptor FTZ-F1%2C transcript variant X8	gene6255	0	1191	XP_019528636.1	nuclear hormone receptor FTZ-F1%2C transcript variant X5	gene32556	0	1197
ort001026	XP_001648026.2	solute carrier family 35 member C2	gene6277	0	919	XP_019528637.1	solute carrier family 35 member C2-like%2C transcript variant X2	gene32579	0	919
ort001027	XP_001648811.1	probable medium-chain specific acyl-CoA dehydrogenase%2C mitochondrial	gene6254	0	855	XP_019528640.1	probable medium-chain specific acyl-CoA dehydrogenase%2C mitochondrial	gene32555	0	855
ort001028	XP_021697830.1	cytoplasmic tRNA 2-thiolation protein 2%2C transcript variant X2	gene6269	0	726	XP_019528641.1	cytoplasmic tRNA 2-thiolation protein 2-like	gene32567	0	726
ort001029	XP_001654593.1	b(0%2C+)-type amino acid transporter 1	gene6265	0	960	XP_019528645.1	b(0%2C+)-type amino acid transporter 1-like%2C transcript variant X2	gene32564	0	960
ort001030	XP_001648788.1	neurocalcin homolog	gene6242	1e-142	395	XP_019528648.1	neurocalcin homolog	gene32541	9e-143	395
ort001031	XP_001648787.1	flightin%2C transcript variant X1	gene6244	9e-96	272	XP_019528651.1	flightin-like%2C transcript variant X1	gene32542	6e-96	272
ort001032	XP_001663658.2	biogenesis of lysosome-related organelles complex 1 subunit 4	gene6276	9e-107	303	XP_019528653.1	biogenesis of lysosome-related organelles complex 1 subunit 4-like	gene32578	5e-109	309
ort001033	XP_001648813.1	uncharacterized LOC5564470	gene6251	4e-92	266	XP_019528654.1	uncharacterized LOC109400620	gene32551	5e-92	265
ort001034	XP_001657184.1	oxidoreductase-like domain-containing protein 1%2C transcript variant X1	gene6307	5e-63	187	XP_019528667.1	oxidoreductase-like domain-containing protein 1%2C transcript variant X1	gene32655	3e-63	187
ort001035	XP_001658898.3	gustatory receptor for sugar taste 43a%2C transcript variant X2	gene14829	0	875	XP_019528669.1	gustatory receptor for sugar taste 43a-like	gene3538	0	875
ort001036	XP_021697849.1	nucleosome-remodeling factor subunit NURF301	gene6287	0	4920	XP_019528675.1	nucleosome-remodeling factor subunit NURF301-like%2C transcript variant X4	gene32633	0	5029
ort001037	XP_001663661.1	vacuolar protein sorting-associated protein 53 homolog	gene6280	0	1661	XP_019528676.1	vacuolar protein sorting-associated protein 53 homolog	gene32622	0	1666
ort001038	XP_021697833.1	probable tRNA (uracil-O(2)-)-methyltransferase	gene6281	0	1073	XP_019528679.1	probable tRNA (uracil-O(2)-)-methyltransferase	gene32620	0	1073
ort001039	XP_021697864.1	vacuolar protein sorting-associated protein 26B-like%2C transcript variant X5	gene6295	0	988	XP_019528684.1	vacuolar protein sorting-associated protein 26B-like%2C transcript variant X2	gene32641	0	964
ort001040	XP_001657016.1	39S ribosomal protein L54%2C mitochondrial	gene6300	9e-83	239	XP_019528688.1	39S ribosomal protein L54%2C mitochondrial-like	gene32650	6e-83	239
ort001041	XP_021697882.1	putative uncharacterized protein DDB_G0282133%2C transcript variant X2	gene6319	0	1321	XP_019528689.1	uncharacterized LOC109400661	gene32669	0	1328
ort001042	XP_001658905.1	turripeptide Pal9.2	gene14838	4e-57	171	XP_019528690.1	turripeptide Pal9.2	gene3550	3e-57	171
ort001043	XP_021697883.1	uncharacterized LOC110675982	gene6320	0	763	XP_019528691.1	uncharacterized LOC109400662	gene32670	0	744
ort001044	XP_001662556.2	DE-cadherin%2C transcript variant X2	gene6305	0	3058	XP_019528701.1	DE-cadherin-like%2C transcript variant X7	gene32653	0	3058
ort001045	XP_001656152.1	uncharacterized LOC5576552	gene6291	0	499	XP_019528702.1	uncharacterized LOC109400667%2C transcript variant X2	gene32637	0	499
ort001046	XP_001658911.2	ribonuclease P protein subunit p29	gene14844	3e-130	365	XP_019528703.1	ribonuclease P protein subunit p29-like	gene3556	2e-130	365
ort001047	XP_001657181.2	23 kDa integral membrane protein%2C transcript variant X1	gene6308	1e-147	411	XP_019528711.1	23 kDa integral membrane protein-like%2C transcript variant X1	gene32656	7e-148	411
ort001048	XP_001657182.2	23 kDa integral membrane protein%2C transcript variant X1	gene6308	6e-147	409	XP_019528712.1	23 kDa integral membrane protein-like%2C transcript variant X1	gene32656	4e-147	409
ort001049	XP_021695513.1	uncharacterized LOC5574928	gene6318	1e-161	449	XP_019528720.1	uncharacterized LOC109400679	gene32668	4e-169	467
ort001050	XP_001661733.1	phosphoacetylglucosamine mutase	gene6316	0	1098	XP_019528721.1	phosphoacetylglucosamine mutase-like	gene32662	0	1098
ort001051	XP_001657019.1	F-actin-capping protein subunit alpha%2C transcript variant X2	gene6302	0	587	XP_019528723.1	F-actin-capping protein subunit alpha-like	gene32652	0	587
ort001052	XP_001650919.1	pre-mRNA-processing factor 19	gene6315	0	1043	XP_019528724.1	pre-mRNA-processing factor 19-like	gene32663	0	1043
ort001053	XP_021697862.1	lactosylceramide 1%2C3-N-acetyl-beta-D-glucosaminyltransferase%2C transcript variant X1	gene6294	0	687	XP_019528727.1	lactosylceramide 1%2C3-N-acetyl-beta-D-glucosaminyltransferase-like	gene32640	0	694
ort001054	XP_001657186.1	uncharacterized LOC5578833	gene6306	2e-113	319	XP_019528728.1	uncharacterized LOC109400688	gene32654	2e-113	319
ort001055	XP_001655507.2	dnaJ homolog subfamily B member 13	gene6343	0	581	XP_019528744.1	dnaJ homolog subfamily B member 13-like	gene32701	0	581
ort001056	XP_021697912.1	ecdysone-induced protein 78C%2C transcript variant X1	gene6356	0	1223	XP_019528745.1	ecdysone-induced protein 78C-like	gene32710	0	1223
ort001057	XP_001657036.2	uncharacterized LOC5578617	gene6367	0	788	XP_019528748.1	uncharacterized LOC109400713	gene32722	0	788
ort001058	XP_021693039.1	titin	gene3438	0	1823	XP_019528750.1	titin	gene3671	0	1826
ort001059	XP_021711882.1	cysteine-rich venom protein 6-like	gene18245	2e-15	67	XP_019528755.1	chymotrypsin inhibitor	gene32692	8e-16	67.8
ort001060	XP_021697903.1	uncharacterized LOC5575134%2C transcript variant X2	gene6347	0	1706	XP_019528760.1	uncharacterized LOC109400724%2C transcript variant X3	gene32705	0	1800
ort001061	XP_011493288.2	succinate--CoA ligase [GDP-forming] subunit beta%2C mitochondrial%2C transcript variant X2	gene3440	0	837	XP_019528761.1	succinate--CoA ligase [GDP-forming] subunit beta%2C mitochondrial-like	gene3672	0	837
ort001062	XP_021697942.1	kinesin-like protein KIN-7O%2C transcript variant X1	gene6383	0	3721	XP_019528763.1	kinesin-like protein KIN-7O	gene32735	0	3717
ort001063	XP_021697936.1	rho-related BTB domain-containing protein 1%2C transcript variant X1	gene6379	0	1547	XP_019528765.1	rho-related BTB domain-containing protein 1-like%2C transcript variant X1	gene32732	0	1547
ort001064	XP_021697937.1	rho-related BTB domain-containing protein 1%2C transcript variant X1	gene6379	0	1561	XP_019528767.1	rho-related BTB domain-containing protein 1-like%2C transcript variant X1	gene32732	0	1561
ort001065	XP_021697943.1	cytochrome c oxidase subunit 6B1%2C transcript variant X2	gene6386	2e-165	469	XP_019528768.1	zinc finger CCCH domain-containing protein 13-like	gene32739	2e-161	459
ort001066	XP_011493753.2	patj homolog	gene6373	0	1649	XP_019528769.1	patj homolog	gene32727	0	1643
ort001067	XP_001662720.1	putative transporter SVOPL	gene3973	0	598	XP_019528770.1	synaptic vesicle glycoprotein 2B-like	gene3673	0	585
ort001068	XP_021697897.1	uncharacterized oxidoreductase YjmC	gene6345	0	887	XP_019528771.1	uncharacterized oxidoreductase YjmC-like	gene32703	0	899
ort001069	XP_021697898.1	O-acetyl-ADP-ribose deacetylase 1%2C transcript variant X4	gene6344	3e-117	330	XP_019528774.1	O-acetyl-ADP-ribose deacetylase 1%2C transcript variant X3	gene32702	2e-117	330
ort001070	XP_021697893.1	uncharacterized LOC5575127%2C transcript variant X1	gene6326	0	1230	XP_019528784.1	uncharacterized LOC109400743%2C transcript variant X1	gene32680	0	1230
ort001071	XP_001655514.1	integrin-linked protein kinase	gene6355	0	930	XP_019528787.1	integrin-linked protein kinase-like	gene32709	0	930
ort001072	XP_021697922.1	protein vein	gene6366	0	1085	XP_019528788.1	protein vein-like%2C transcript variant X4	gene32721	0	1107
ort001073	XP_001656317.1	uracil phosphoribosyltransferase homolog	gene6365	1e-166	459	XP_019528793.1	uracil phosphoribosyltransferase homolog	gene32720	7e-167	459
ort001074	XP_021697945.1	cell growth-regulating nucleolar protein	gene6388	0	520	XP_019528795.1	cell growth-regulating nucleolar protein-like	gene32736	0	515
ort001075	XP_021697917.1	glycine cleavage system H protein%2C mitochondrial	gene6361	7e-114	320	XP_019528797.1	glycine cleavage system H protein%2C mitochondrial-like	gene32715	5e-114	320
ort001076	XP_021693044.1	uncharacterized LOC23687380	gene3446	0	909	XP_019528803.1	uncharacterized LOC109400757	gene3676	0	880
ort001077	XP_021697915.1	inositol monophosphatase 1	gene6359	0	552	XP_019528805.1	inositol monophosphatase 1	gene32712	0	552
ort001078	XP_001657034.2	uncharacterized LOC5578619	gene6369	5e-32	112	XP_019528809.1	uncharacterized LOC109400765	gene32724	4e-32	112
ort001079	XP_001655522.2	uncharacterized LOC5575145	gene6362	0	751	XP_019528810.1	uncharacterized LOC109400766	gene32716	0	753
ort001080	XP_011492953.2	farnesol dehydrogenase-like	gene17106	3e-167	462	XP_019528826.1	farnesol dehydrogenase-like	gene32763	2e-167	462
ort001081	XP_021708437.1	farnesol dehydrogenase-like%2C transcript variant X1	gene17108	8e-172	473	XP_019528828.1	farnesol dehydrogenase-like	gene32767	5e-172	473
ort001082	XP_021709170.1	protein kinase C-binding protein NELL2%2C transcript variant X2	gene17095	0	1698	XP_019528831.1	protein kinase C-binding protein NELL2-like%2C transcript variant X4	gene32743	0	1698
ort001083	XP_021709167.1	protein kinase C-binding protein NELL2%2C transcript variant X2	gene17095	0	1712	XP_019528833.1	protein kinase C-binding protein NELL2-like%2C transcript variant X4	gene32743	0	1712
ort001084	XP_001650422.2	UDP-glucuronosyltransferase 2B15	gene17096	0	804	XP_019528836.1	UDP-glucuronosyltransferase 2B15-like	gene32745	0	804
ort001085	XP_001656814.2	39S ribosomal protein L15%2C mitochondrial	gene17155	0	569	XP_019528839.1	39S ribosomal protein L15%2C mitochondrial	gene394	0	569
ort001086	XP_001650421.1	uncharacterized LOC5566061	gene17094	0	660	XP_019528841.1	uncharacterized LOC109400796	gene32741	0	660
ort001087	XP_001650428.1	uncharacterized protein CG13380	gene17100	2e-50	154	XP_019528843.1	uncharacterized protein CG13380	gene32750	2e-50	154
ort001088	XP_011493120.1	cytochrome b-c1 complex subunit 8%2C transcript variant X4	gene17098	1e-58	174	XP_019528844.1	cytochrome b-c1 complex subunit 8-like	gene32748	9e-59	174
ort001089	XP_021708857.1	probable tubulin polyglutamylase TTLL1%2C transcript variant X3	gene17097	0	867	XP_019528845.1	probable tubulin polyglutamylase TTLL1	gene32747	0	867
ort001090	XP_001647921.1	general odorant-binding protein 72	gene13079	9e-89	255	XP_019528847.1	general odorant-binding protein 72-like	gene32783	6e-89	255
ort001091	XP_021708906.1	uncharacterized LOC5563605	gene13086	1e-152	436	XP_019528853.1	uncharacterized LOC109400810	gene32792	1e-152	436
ort001092	XP_021712743.1	uncharacterized LOC5563604	gene19346	0	701	XP_019528855.1	uncharacterized LOC109400813	gene32796	0	701
ort001093	XP_021707655.1	uncharacterized LOC5563600%2C transcript variant X2	gene13090	0	701	XP_019528856.1	uncharacterized LOC109400814	gene32797	0	701
ort001094	XP_001647908.2	glutamate receptor ionotropic%2C kainate 5	gene13092	0	880	XP_019528858.1	uncharacterized LOC109400816	gene32799	0	895
ort001095	XP_021707303.1	extensin-1%2C transcript variant X1	gene13099	0	784	XP_019528859.1	proline-rich extensin-like protein EPR1	gene32814	0	743
ort001096	XP_001650856.2	WD repeat-containing protein 91	gene3522	0	577	XP_019528862.1	WD repeat-containing protein 91-like	gene3688	0	583
ort001097	XP_021709330.1	gustatory receptor for sugar taste 64a	gene13129	0	825	XP_019528863.1	gustatory receptor for sugar taste 64a-like	gene32840	0	841
ort001098	XP_001647904.2	DNA-directed RNA polymerase II subunit RPB1	gene13096	0	585	XP_019528865.1	DNA-directed RNA polymerase II subunit RPB1-like	gene32808	0	587
ort001099	XP_001647902.2	altered inheritance of mitochondria protein 3	gene13098	2e-156	439	XP_019528867.1	altered inheritance of mitochondria protein 3-like	gene32809	2e-164	459
ort001100	XP_021694018.1	tRNA-specific adenosine deaminase 2%2C transcript variant X8	gene4203	1e-163	473	XP_019528868.1	uncharacterized LOC109400829	gene32812	9e-164	473
ort001101	XP_001647881.2	gustatory receptor for sugar taste 61a	gene13128	0	784	XP_019528869.1	gustatory receptor for sugar taste 61a-like	gene32839	0	797
ort001102	XP_021706388.1	uncharacterized LOC5563632	gene13106	0	761	XP_019528871.1	uncharacterized LOC109400838	gene32815	0	762
ort001103	XP_021704600.1	histone-lysine N-methyltransferase trithorax%2C transcript variant X2	gene13112	0	5752	XP_019528876.1	histone-lysine N-methyltransferase trithorax	gene32823	0	5742
ort001104	XP_001647891.2	protein FAM114A2	gene13118	0	1012	XP_019528879.1	protein FAM114A2%2C transcript variant X1	gene32826	0	1011
ort001105	XP_001647892.2	probable dimethyladenosine transferase	gene13117	0	622	XP_019528880.1	probable dimethyladenosine transferase	gene32825	0	622
ort001106	XP_001647890.2	nucleolar protein 12	gene13119	2e-137	389	XP_019528881.1	nucleolar protein 12-like	gene32827	3e-151	423
ort001107	XP_021705396.1	zinc transporter 7%2C transcript variant X2	gene13122	0	734	XP_019528885.1	zinc transporter 7	gene32832	0	734
ort001108	XP_021705225.1	general odorant-binding protein 19d	gene13093	2e-75	221	XP_019528891.1	general odorant-binding protein 19d-like	gene32800	2e-75	221
ort001109	XP_001647884.1	SUMO-activating enzyme subunit 1	gene13125	0	630	XP_019528899.1	SUMO-activating enzyme subunit 1-like	gene32835	0	630
ort001110	XP_021704981.1	double-strand break repair protein MRE11	gene13114	0	1142	XP_019528901.1	double-strand break repair protein MRE11%2C transcript variant X2	gene32824	0	1167
ort001111	XP_021708176.1	sialic acid synthase	gene13123	0	615	XP_019528907.1	sialic acid synthase-like	gene32833	0	615
ort001112	XP_001647885.1	tctex1 domain-containing protein 2	gene13124	4e-104	294	XP_019528908.1	tctex1 domain-containing protein 2	gene32834	3e-104	294
ort001113	XP_021712862.1	regulator of G-protein signaling 7-like	gene19507	0	1020	XP_019528918.1	regulator of G-protein signaling 7-like	gene3695	0	1020
ort001114	XP_021694251.1	uncharacterized LOC110674283	gene1709	3e-124	355	XP_019528921.1	tripartite motif-containing protein 42	gene32890	1e-135	384
ort001115	XP_021702025.1	uncharacterized LOC5575022	gene1700	0	1598	XP_019528922.1	uncharacterized LOC109400894	gene32891	0	1616
ort001116	XP_001651439.2	uncharacterized LOC5567040	gene1742	5e-83	242	XP_019528925.1	uncharacterized LOC109400899	gene32853	3e-83	242
ort001117	XP_021693131.1	cyclin-G-associated kinase	gene3533	0	2218	XP_019528926.1	cyclin-G-associated kinase-like	gene3696	0	2221
ort001118	XP_001661759.2	odorant receptor 56a	gene1716	0	809	XP_019528928.1	odorant receptor 56a-like	gene32885	0	809
ort001119	XP_001661758.1	serine/threonine-protein kinase OSR1	gene1713	0	1074	XP_019528942.1	serine/threonine-protein kinase OSR1-like	gene32888	0	1074
ort001120	XP_001658020.2	NADP-dependent malic enzyme	gene4157	0	724	XP_019528943.1	NADP-dependent malic enzyme%2C transcript variant X2	gene32855	0	740
ort001121	XP_021705037.1	uncharacterized LOC110677813	gene11931	0	785	XP_019528950.1	constitutive coactivator of PPAR-gamma-like protein 1%2C transcript variant X1	gene32880	0	808
ort001122	XP_001650845.1	uncharacterized LOC5566463	gene3531	0	568	XP_019528956.1	uncharacterized LOC109400918	gene3698	0	574
ort001123	XP_021702364.1	uncharacterized LOC5567052	gene1738	0	764	XP_019528957.1	uncharacterized LOC109400922	gene32857	0	764
ort001124	XP_001657630.2	uncharacterized LOC5567723%2C transcript variant X1	gene1735	1e-157	438	XP_019528964.1	uncharacterized LOC109400930%2C transcript variant X1	gene32865	2e-163	452
ort001125	XP_021702306.1	uncharacterized LOC5567723%2C transcript variant X1	gene1735	4e-143	400	XP_019528965.1	uncharacterized LOC109400930%2C transcript variant X1	gene32865	9e-149	414
ort001126	XP_001657629.2	uncharacterized LOC5567723%2C transcript variant X1	gene1735	3e-136	381	XP_019528967.1	uncharacterized LOC109400930%2C transcript variant X1	gene32865	7e-142	395
ort001127	XP_001651441.2	uncharacterized LOC5567042	gene1744	5e-127	356	XP_019528971.1	uncharacterized LOC109400933	gene32851	4e-127	356
ort001128	XP_001651440.2	serine protease easter	gene1743	0	678	XP_019528972.1	serine protease easter-like	gene32852	0	666
ort001129	XP_021709390.1	uncharacterized LOC110679329	gene15012	1e-119	350	XP_019528977.1	uncharacterized LOC109400954	gene32903	1e-118	348
ort001130	XP_021700568.1	uncharacterized LOC5564174%2C transcript variant X1	gene8378	0	1197	XP_019528981.1	protein jagged-1b-like	gene32909	0	1197
ort001131	XP_001663135.1	protein D3	gene3426	4e-134	374	XP_019528990.1	protein D3	gene3702	3e-134	374
ort001132	XP_021700539.1	serine/threonine-protein kinase ATM%2C transcript variant X1	gene8362	0	5187	XP_019528991.1	serine/threonine-protein kinase ATM-like	gene32936	0	5187
ort001133	XP_021700551.1	uncharacterized LOC5566421%2C transcript variant X4	gene8371	0	1331	XP_019528998.1	uncharacterized LOC109400987%2C transcript variant X1	gene32923	0	1351
ort001134	XP_001650824.1	adenosine monophosphate-protein transferase FICD homolog	gene8372	0	972	XP_019529001.1	adenosine monophosphate-protein transferase FICD homolog	gene32916	0	972
ort001135	XP_021700556.1	protein rolling stone%2C transcript variant X1	gene8373	0	525	XP_019529003.1	protein rolling stone-like%2C transcript variant X2	gene32915	0	525
ort001136	XP_021700543.1	RNA-binding protein with serine-rich domain 1-A-like	gene8366	2e-139	397	XP_019529006.1	RNA-binding protein with serine-rich domain 1-A-like	gene32933	5e-139	395
ort001137	XP_001650816.1	glycosyltransferase-like domain-containing protein 1-like	gene8367	0	752	XP_019529007.1	glycosyltransferase-like domain-containing protein 1-like	gene32932	0	752
ort001138	XP_021700544.1	nuclear receptor subfamily 2 group E member 1	gene8369	0	1020	XP_019529008.1	nuclear receptor subfamily 2 group E member 1-like	gene32927	0	1021
ort001139	XP_021693019.1	ras-related and estrogen-regulated growth inhibitor-like protein%2C transcript variant X4	gene3417	2e-155	429	XP_019529014.1	ras-related and estrogen-regulated growth inhibitor	gene3708	1e-155	429
ort001140	XP_001656816.2	alsin homolog	gene17156	0	2566	XP_019529022.1	alsin homolog	gene395	0	2548
ort001141	XP_021699212.1	protein sarah%2C transcript variant X1	gene7380	3e-178	492	XP_019529023.1	protein sarah-like%2C transcript variant X1	gene32969	2e-178	492
ort001142	XP_021696282.1	uncharacterized LOC110675471	gene7357	4e-71	207	XP_019529024.1	uncharacterized LOC109401011	gene32977	3e-71	207
ort001143	XP_021699222.1	peroxisomal targeting signal 2 receptor%2C transcript variant X1	gene7387	0	662	XP_019529031.1	peroxisomal targeting signal 2 receptor-like%2C transcript variant X2	gene32951	0	662
ort001144	XP_021699224.1	peroxisomal targeting signal 2 receptor%2C transcript variant X1	gene7387	0	662	XP_019529032.1	peroxisomal targeting signal 2 receptor-like%2C transcript variant X2	gene32951	0	662
ort001145	XP_021699207.1	ragulator complex protein LAMTOR4 homolog%2C transcript variant X4	gene7378	7e-68	199	XP_019529049.1	ragulator complex protein LAMTOR4 homolog%2C transcript variant X1	gene32963	5e-68	199
ort001146	XP_001660443.2	exocyst complex component 7	gene7375	0	1322	XP_019529052.1	exocyst complex component 7-like	gene32965	0	1322
ort001147	XP_001660442.2	vacuolar fusion protein CCZ1 homolog	gene7374	0	859	XP_019529054.1	vacuolar fusion protein CCZ1 homolog	gene32967	0	859
ort001148	XP_021711956.1	uncharacterized LOC5578990	gene18350	1e-148	441	XP_019529055.1	uncharacterized LOC109401027%2C transcript variant X2	gene32968	1e-148	441
ort001149	XP_001663233.1	kinesin-related protein 6%2C transcript variant X2	gene7384	2e-155	432	XP_019529061.1	epsin-2-like%2C transcript variant X2	gene32956	1e-155	432
ort001150	XP_001660440.2	pyrroline-5-carboxylate reductase 1%2C mitochondrial	gene7359	0	537	XP_019529062.1	pyrroline-5-carboxylate reductase 1%2C mitochondrial-like	gene32976	0	537
ort001151	XP_001659497.1	NADH dehydrogenase [ubiquinone] 1 alpha subcomplex assembly factor 3	gene13548	2e-130	364	XP_019529064.1	NADH dehydrogenase [ubiquinone] 1 alpha subcomplex assembly factor 3-like	gene32989	2e-130	364
ort001152	XP_001663924.1	electron transfer flavoprotein subunit alpha%2C mitochondrial	gene3410	0	652	XP_019529067.1	electron transfer flavoprotein subunit alpha%2C mitochondrial-like	gene3715	0	652
ort001153	XP_021709660.1	zinc finger protein 888	gene13544	7e-157	447	XP_019529072.1	zinc finger protein 808-like	gene32985	5e-157	447
ort001154	XP_021708508.1	USP6 N-terminal-like protein%2C transcript variant X11	gene13547	0	1998	XP_019529076.1	uncharacterized LOC109401053%2C transcript variant X3	gene32988	0	1994
ort001155	XP_001658653.1	5-aminolevulinate synthase%2C nonspecific%2C mitochondrial%2C transcript variant X1	gene13555	0	1150	XP_019529079.1	5-aminolevulinate synthase%2C nonspecific%2C mitochondrial%2C transcript variant X1	gene32994	0	1135
ort001156	XP_021704204.1	uncharacterized LOC5571068	gene13540	0	2563	XP_019529082.1	uncharacterized LOC109401056%2C transcript variant X2	gene32980	0	2523
ort001157	XP_001658652.1	uncharacterized LOC5569632	gene13554	0	685	XP_019529088.1	V-type proton ATPase subunit S1	gene32992	0	688
ort001158	XP_021693010.1	alpha-mannosidase 2	gene3408	0	2449	XP_019529090.1	alpha-mannosidase 2-like	gene3716	0	2449
ort001159	XP_001659495.1	UPF0183 protein CG7083	gene13552	0	912	XP_019529092.1	UPF0183 protein CG7083	gene32991	0	912
ort001160	XP_001658661.1	uncharacterized LOC5569635	gene13562	4e-166	461	XP_019529094.1	uncharacterized LOC109401063	gene33001	3e-166	461
ort001161	XP_021708237.1	protein artichoke	gene13557	0	948	XP_019529095.1	leucine-rich repeats and immunoglobulin-like domains protein 1	gene32996	0	972
ort001162	XP_021710879.1	uncharacterized LOC110679679	gene11579	0	521	XP_019529098.1	uncharacterized LOC109401070	gene33008	0	521
ort001163	XP_021700561.1	uncharacterized LOC5566438%2C transcript variant X5	gene8377	0	1896	XP_019529100.1	uncharacterized LOC109401074%2C transcript variant X3	gene33011	0	1896
ort001164	XP_021698589.1	transcription factor Adf-1-like	gene11496	7e-87	258	XP_019529103.1	uncharacterized LOC109401077	gene33015	1e-89	265
ort001165	XP_021700750.1	voltage-dependent calcium channel subunit alpha-2/delta-4%2C transcript variant X4	gene8526	0	641	XP_019529105.1	voltage-dependent calcium channel subunit alpha-2/delta-3-like%2C transcript variant X2	gene33009	0	641
ort001166	XP_021700560.1	uncharacterized LOC110676551	gene8375	5e-105	301	XP_019529106.1	uncharacterized LOC109401081	gene33010	4e-105	301
ort001167	XP_021700555.1	protein rolling stone%2C transcript variant X1	gene8373	0	627	XP_019529108.1	protein rolling stone-like%2C transcript variant X1	gene33007	0	627
ort001168	XP_021708462.1	uncharacterized LOC110678984	gene13854	0	544	XP_019529110.1	uncharacterized LOC109401085	gene33020	0	542
ort001169	XP_021708464.1	U7 snRNA-associated Sm-like protein LSm10%2C transcript variant X2	gene13852	2e-93	267	XP_019529112.1	U7 snRNA-associated Sm-like protein LSm10	gene33021	1e-93	267
ort001170	XP_001652930.1	cytochrome P450 4d1	gene13845	0	904	XP_019529120.1	uncharacterized LOC109401093	gene33030	0	924
ort001171	XP_021699735.1	uncharacterized LOC110676380	gene7784	6e-128	372	XP_019529124.1	uncharacterized LOC109401097	gene33048	7e-128	372
ort001172	XP_021710090.1	uncharacterized LOC110679536	gene13818	8e-68	204	XP_019529135.1	uncharacterized LOC109401113	gene33063	6e-68	204
ort001173	XP_021710980.1	cytochrome P450 4d2%2C transcript variant X1	gene13839	0	967	XP_019529142.1	cytochrome P450 4d2-like%2C transcript variant X1	gene33033	0	958
ort001174	XP_021704428.1	rho GTPase-activating protein 15%2C transcript variant X1	gene13846	0	507	XP_019529145.1	WW domain-containing protein tag-325-like%2C transcript variant X2	gene33029	0	514
ort001175	XP_021707801.1	semaphorin-5A%2C transcript variant X1	gene13831	0	2125	XP_019529147.1	semaphorin-5A-like	gene33049	0	2164
ort001176	XP_001652912.1	mitosis initiation protein fs(1)Ya	gene13824	0	1059	XP_019529150.1	mitosis initiation protein fs(1)Ya	gene33057	0	1063
ort001177	XP_001652914.1	regulator of chromosome condensation%2C transcript variant X1	gene13826	0	961	XP_019529151.1	regulator of chromosome condensation	gene33056	0	952
ort001178	XP_021704232.1	L-ascorbate oxidase	gene13828	0	1873	XP_019529152.1	L-ascorbate oxidase-like	gene33052	0	1873
ort001179	XP_021710732.1	mucin-17%2C transcript variant X2	gene13819	0	2325	XP_019529153.1	serine-rich adhesin for platelets-like	gene33061	0	2379
ort001180	XP_001652911.1	augmin complex subunit dgt6	gene13823	0	1256	XP_019529155.1	uncharacterized LOC109401132	gene33058	0	1240
ort001181	XP_021693013.1	intron-binding protein aquarius	gene3412	0	607	XP_019529158.1	intron-binding protein aquarius-like	gene3709	0	617
ort001182	XP_001652913.1	E3 ubiquitin-protein ligase RNF220	gene13825	0	661	XP_019529159.1	E3 ubiquitin-protein ligase RNF220-like	gene33055	0	686
ort001183	XP_021706356.1	inactive ubiquitin carboxyl-terminal hydrolase MINDY-4B%2C transcript variant X1	gene13836	0	791	XP_019529160.1	protein FAM188B2-like	gene33036	0	791
ort001184	XP_021708824.1	uncharacterized LOC110679125	gene13837	9e-110	318	XP_019529161.1	uncharacterized LOC109401138	gene33035	3e-107	311
ort001185	XP_021709109.1	helix-loop-helix protein 13-like%2C transcript variant X4	gene13827	9e-164	451	XP_019529165.1	basic helix-loop-helix transcription factor amos-like%2C transcript variant X1	gene33053	7e-164	451
ort001186	XP_001663186.1	splicing factor%2C arginine/serine-rich 15	gene16062	1e-61	191	XP_019529166.1	G-box-binding factor	gene33086	1e-71	216
ort001187	XP_001662274.1	cationic amino acid transporter 3%2C transcript variant X2	gene16079	0	749	XP_019529170.1	cationic amino acid transporter 2-like	gene33073	0	779
ort001188	XP_021706108.1	nuclear pore complex protein Nup85	gene16053	0	1375	XP_019529172.1	nuclear pore complex protein Nup85	gene33094	0	1375
ort001189	XP_001663396.2	DNA excision repair protein haywire	gene16058	0	1662	XP_019529174.1	DNA excision repair protein haywire	gene33090	0	1662
ort001190	XP_001663180.1	glucose-6-phosphate isomerase	gene16055	0	1142	XP_019529179.1	glucose-6-phosphate isomerase	gene33092	0	1142
ort001191	XP_001663393.1	zinc finger E-box-binding homeobox 1	gene16060	0	556	XP_019529194.1	zinc finger protein Xfin-like	gene33087	0	543
ort001192	XP_001659989.1	lipoyl synthase%2C mitochondrial	gene16071	0	758	XP_019529195.1	lipoyl synthase%2C mitochondrial	gene33078	0	765
ort001193	XP_021708049.1	centrosomal protein of 164 kDa%2C transcript variant X2	gene16007	0	2040	XP_019529199.1	centrosomal protein of 164 kDa	gene33145	0	2068
ort001194	XP_001650851.1	annexin B10%2C transcript variant X2	gene3525	0	570	XP_019529207.1	annexin B10-like	gene3691	0	572
ort001195	XP_001654866.1	uncharacterized LOC5573841	gene15994	5e-107	310	XP_019529208.1	uncharacterized LOC109401187	gene33161	3e-106	308
ort001196	XP_021709521.1	protein FAM192A%2C transcript variant X2	gene16016	3e-146	410	XP_019529213.1	protein FAM192A%2C transcript variant X2	gene33132	5e-155	432
ort001197	XP_001661339.1	cuticle protein 67	gene16010	2e-101	288	XP_019529220.1	cuticle protein 67-like	gene33141	2e-101	288
ort001198	XP_001662181.2	protein extra-macrochaetae	gene4613	2e-94	270	XP_019529232.2	protein extra-macrochaetae	gene33983	4e-90	259
ort001199	XP_021710214.1	EH domain-binding protein 1%2C transcript variant X3	gene15980	0	1103	XP_019529233.1	EH domain-binding protein 1-like%2C transcript variant X2	gene33174	0	1064
ort001200	XP_021708214.1	zinc finger protein OZF	gene15978	2e-62	206	XP_019529238.1	zinc finger protein 224	gene33179	4e-63	207
ort001201	XP_021711616.1	zinc finger protein 260	gene15965	0	837	XP_019529239.1	zinc finger protein PLAG1-like	gene33191	0	835
ort001202	XP_021711617.1	caspase-8	gene15964	0	885	XP_019529240.1	caspase-8-like	gene33192	0	885
ort001203	XP_021710179.1	succinate dehydrogenase [ubiquinone] flavoprotein subunit%2C mitochondrial%2C transcript variant X1	gene15948	0	1368	XP_019529247.1	succinate dehydrogenase [ubiquinone] flavoprotein subunit%2C mitochondrial-like	gene33210	0	1368
ort001204	XP_021710388.1	sister chromatid cohesion protein PDS5 homolog B-B%2C transcript variant X2	gene15983	0	2351	XP_019529258.1	sister chromatid cohesion protein PDS5 homolog B-B	gene33172	0	2351
ort001205	XP_021707686.1	plexin domain-containing protein 2%2C transcript variant X1	gene16009	0	1092	XP_019529260.1	plexin domain-containing protein 2%2C transcript variant X3	gene33142	0	1086
ort001206	XP_021710745.1	DNA-directed RNA polymerase III subunit RPC1	gene15952	0	2846	XP_019529265.1	DNA-directed RNA polymerase III subunit RPC1-like	gene33203	0	2846
ort001207	XP_021709437.1	putative ATP-dependent RNA helicase DHX33%2C transcript variant X1	gene16024	0	1197	XP_019529268.1	putative ATP-dependent RNA helicase DHX33	gene33127	0	1197
ort001208	XP_001655621.1	luc7-like protein 3	gene15954	2e-177	494	XP_019529270.1	luc7-like protein 3	gene33206	8e-180	499
ort001209	XP_001660945.1	1%2C4-alpha-glucan-branching enzyme	gene15946	0	1386	XP_019529271.1	1%2C4-alpha-glucan-branching enzyme-like	gene33211	0	1386
ort001210	XP_021709616.1	LIM domain-binding protein 2%2C transcript variant X3	gene16011	0	1251	XP_019529283.1	LIM domain-binding protein 2%2C transcript variant X4	gene33140	0	1251
ort001211	XP_021704242.1	tubulin-specific chaperone E	gene16017	0	1003	XP_019529297.1	tubulin-specific chaperone E	gene33131	0	1003
ort001212	XP_021704243.1	protein-glutamate O-methyltransferase	gene16018	0	845	XP_019529298.1	protein-glutamate O-methyltransferase-like	gene33130	0	845
ort001213	XP_021711349.1	glutathione S-transferase%2C transcript variant X1	gene15939	1e-147	410	XP_019529313.1	glutathione S-transferase%2C transcript variant X1	gene33224	8e-148	410
ort001214	XP_001648099.1	WD repeat-containing protein CG11141	gene15972	0	863	XP_019529321.1	WD repeat-containing protein CG11141	gene33184	0	844
ort001215	XP_001660944.1	general transcription factor 3C polypeptide 3	gene15945	0	1662	XP_019529322.1	general transcription factor 3C polypeptide 3-like	gene33212	0	1677
ort001216	XP_021704463.1	serine/threonine-protein kinase PAK mbt%2C transcript variant X9	gene16031	0	1358	XP_019529323.1	serine/threonine-protein kinase PAK mbt	gene33118	0	1328
ort001217	XP_021698203.1	phospholipid scramblase 1%2C transcript variant X8	gene6531	0	587	XP_019529327.1	phospholipid scramblase 1-like%2C transcript variant X6	gene3732	0	587
ort001218	XP_001661868.1	enoyl-CoA hydratase domain-containing protein 3%2C mitochondrial	gene15940	2e-178	493	XP_019529328.1	enoyl-CoA hydratase domain-containing protein 3%2C mitochondrial-like	gene33222	1e-178	493
ort001219	XP_021707251.1	putative ATP synthase subunit f%2C mitochondrial	gene15997	1e-74	216	XP_019529329.1	putative ATP synthase subunit f%2C mitochondrial	gene33154	9e-75	216
ort001220	XP_021708339.1	titin homolog%2C transcript variant X1	gene15999	0	5715	XP_019529330.1	uncharacterized LOC109401291	gene33152	0	5792
ort001221	XP_021707466.1	nucleolar protein 9	gene15958	0	1141	XP_019529336.1	nucleolar protein 9-like	gene33194	0	1153
ort001222	XP_001655624.2	WD repeat-containing protein 74	gene15951	0	691	XP_019529339.1	WD repeat-containing protein 74-like	gene33201	0	694
ort001223	XP_021707796.1	uncharacterized LOC110678767	gene15987	0	571	XP_019529341.1	uncharacterized LOC109401298	gene33168	0	571
ort001224	XP_021698205.1	phospholipid scramblase 1%2C transcript variant X8	gene6531	0	509	XP_019529343.1	phospholipid scramblase 1-like%2C transcript variant X6	gene3732	0	509
ort001225	XP_021712001.1	integral membrane protein GPR180	gene18413	0	754	XP_019529346.1	integral membrane protein GPR180-like	gene33169	0	756
ort001226	XP_001648314.1	uncharacterized LOC5563994	gene16020	0	667	XP_019529347.1	uncharacterized LOC109401301	gene33129	0	667
ort001227	XP_021706109.1	probable sulfite oxidase%2C mitochondrial	gene16027	0	1061	XP_019529350.1	probable sulfite oxidase%2C mitochondrial	gene33122	0	1061
ort001228	XP_001656819.1	proteasome subunit beta type-7	gene17160	0	575	XP_019529351.1	proteasome subunit beta type-7-like	gene398	0	575
ort001229	XP_021707129.1	ras-related protein Rab-18A-like	gene16028	1e-142	396	XP_019529353.1	ras-related protein Rab-18A-like%2C transcript variant X2	gene33121	7e-143	396
ort001230	XP_001648098.1	transmembrane protein 198	gene15973	0	666	XP_019529354.1	transmembrane protein 198-like	gene33183	0	667
ort001231	XP_021707606.1	zinc finger protein 675-like	gene15959	0	733	XP_019529356.1	zinc finger protein 652-B	gene33193	0	696
ort001232	XP_021708088.1	CENPB DNA-binding domain-containing protein 1-like	gene15969	3e-105	307	XP_019529362.1	uncharacterized LOC109401315%2C transcript variant X2	gene33185	2e-105	307
ort001233	XP_001654860.1	GRIP and coiled-coil domain-containing protein 1	gene16001	0	1194	XP_019529365.1	GRIP and coiled-coil domain-containing protein 1	gene33151	0	1168
ort001234	XP_001664290.2	probable cytochrome P450 28a5	gene12793	0	954	XP_019529367.1	probable cytochrome P450 28a5%2C transcript variant X1	gene33230	0	954
ort001235	XP_021706381.1	mediator of RNA polymerase II transcription subunit 15-like	gene12798	4e-83	269	XP_019529372.1	mediator of RNA polymerase II transcription subunit 15-like	gene33239	5e-100	314
ort001236	XP_021707098.1	shematrin-like protein 1	gene12799	7e-77	228	XP_019529375.1	uncharacterized LOC109401328	gene33240	1e-79	235
ort001237	XP_021710754.1	glycogen synthase kinase-3 beta%2C transcript variant X2	gene12810	0	929	XP_019529380.1	glycogen synthase kinase-3 beta-like%2C transcript variant X1	gene33249	0	929
ort001238	XP_021708318.1	pancreatic lipase-related protein 2	gene12804	0	547	XP_019529387.1	pancreatic lipase-related protein 2-like%2C transcript variant X2	gene33245	0	547
ort001239	XP_021709133.1	segment polarity protein dishevelled%2C transcript variant X6	gene12805	0	1155	XP_019529391.1	segment polarity protein dishevelled-like%2C transcript variant X4	gene33246	0	1155
ort001240	XP_021705228.1	dopamine D2-like receptor	gene12795	0	1251	XP_019529396.1	dopamine D2-like receptor	gene33234	0	1232
ort001241	XP_001659059.1	N-alpha-acetyltransferase 38%2C NatC auxiliary subunit	gene12802	1e-73	214	XP_019529398.1	N-alpha-acetyltransferase 38%2C NatC auxiliary subunit	gene33242	9e-74	214
ort001242	XP_001653399.1	lysozyme 2	gene8409	9e-106	300	XP_019529410.1	lysozyme 2-like	gene33271	6e-106	300
ort001243	XP_001663800.2	outer dense fiber protein 3	gene3346	4e-152	422	XP_019529411.1	outer dense fiber protein 3-like	gene33272	3e-152	422
ort001244	XP_021696907.1	uncharacterized LOC110675647	gene8433	4e-125	356	XP_019529413.1	uncharacterized LOC109401358	gene33301	6e-124	353
ort001245	XP_021700595.1	uncharacterized LOC5570926	gene8400	0	2699	XP_019529417.1	S phase cyclin A-associated protein in the endoplasmic reticulum-like	gene33256	0	2709
ort001246	XP_021695259.1	general odorant-binding protein 45-like	gene8426	4e-164	456	XP_019529427.1	general odorant-binding protein 45-like	gene33293	3e-164	456
ort001247	XP_021700609.1	sodium/hydrogen exchanger 3%2C transcript variant X17	gene8406	0	1673	XP_019529428.1	sodium/hydrogen exchanger 3-like%2C transcript variant X5	gene33268	0	1692
ort001248	XP_021700682.1	uncharacterized LOC5572927%2C transcript variant X9	gene8456	0	3343	XP_019529444.1	uncharacterized LOC109401370%2C transcript variant X2	gene33317	0	3350
ort001249	XP_021700686.1	uncharacterized LOC5572927%2C transcript variant X9	gene8456	0	3345	XP_019529445.1	uncharacterized LOC109401370%2C transcript variant X2	gene33317	0	3352
ort001250	XP_021700661.1	dual specificity tyrosine-phosphorylation-regulated kinase 2%2C transcript variant X4	gene8434	0	1226	XP_019529449.1	dual specificity tyrosine-phosphorylation-regulated kinase 2-like%2C transcript variant X3	gene33302	0	1226
ort001251	XP_021700675.1	laminin subunit alpha-1%2C transcript variant X4	gene8440	0	3532	XP_019529458.1	laminin subunit alpha-1-like%2C transcript variant X3	gene33303	0	3530
ort001252	XP_001656820.1	40S ribosomal protein S16	gene17161	3e-105	297	XP_019529467.1	40S ribosomal protein S16	gene399	3e-105	297
ort001253	XP_001653383.2	cGMP-dependent 3'%2C5'-cyclic phosphodiesterase%2C transcript variant X11	gene8424	0	1546	XP_019529471.1	cGMP-dependent 3'%2C5'-cyclic phosphodiesterase-like%2C transcript variant X2	gene33291	0	1573
ort001254	XP_021700643.1	cGMP-dependent 3'%2C5'-cyclic phosphodiesterase%2C transcript variant X11	gene8424	0	1383	XP_019529473.1	cGMP-dependent 3'%2C5'-cyclic phosphodiesterase-like%2C transcript variant X2	gene33291	0	1392
ort001255	XP_001654260.2	isocitrate dehydrogenase [NAD] subunit beta%2C mitochondrial	gene8454	0	754	XP_019529492.1	isocitrate dehydrogenase [NAD] subunit beta%2C mitochondrial-like	gene33315	0	754
ort001256	XP_001653393.1	protoheme IX farnesyltransferase%2C mitochondrial	gene8415	0	900	XP_019529496.1	protoheme IX farnesyltransferase%2C mitochondrial-like	gene33279	0	900
ort001257	XP_001653396.1	ethanolaminephosphotransferase 1	gene8412	0	787	XP_019529498.1	ethanolaminephosphotransferase 1-like%2C transcript variant X3	gene33275	0	787
ort001258	XP_001654254.1	uncharacterized LOC5572919	gene8448	0	1126	XP_019529502.1	uncharacterized LOC109401405	gene33310	0	1104
ort001259	XP_001653395.1	anamorsin homolog	gene8413	7e-175	482	XP_019529505.1	anamorsin homolog	gene33278	4e-158	439
ort001260	XP_021700659.1	eukaryotic translation initiation factor 4 gamma%2C transcript variant X2	gene8432	0	2171	XP_019529507.1	eukaryotic translation initiation factor 4 gamma-like	gene33299	0	2158
ort001261	XP_001654253.2	uncharacterized LOC5572920	gene8447	0	795	XP_019529508.1	uncharacterized LOC109401411	gene33308	0	795
ort001262	XP_001654255.1	ATP synthase mitochondrial F1 complex assembly factor 2	gene8449	0	523	XP_019529509.1	ATP synthase mitochondrial F1 complex assembly factor 2-like	gene33312	0	523
ort001263	XP_021700625.1	uncharacterized LOC5570918%2C transcript variant X1	gene8411	0	658	XP_019529513.1	uncharacterized LOC109401415	gene33274	0	681
ort001264	XP_001654265.1	sodium/potassium-transporting ATPase subunit beta-1	gene8460	0	590	XP_019529515.1	sodium/potassium-transporting ATPase subunit beta-1-like	gene33321	0	590
ort001265	XP_021700588.1	neuronal acetylcholine receptor subunit alpha-4%2C transcript variant X2	gene8396	0	807	XP_019529517.1	neuronal acetylcholine receptor subunit alpha-4-like	gene33252	0	823
ort001266	XP_001653381.1	thyrostimulin beta-5 subunit	gene8428	2e-119	334	XP_019529520.1	glycoprotein hormone beta-5-like	gene33295	1e-119	334
ort001267	XP_021696909.1	transmembrane protease serine 9	gene8472	0	671	XP_019529527.1	chymotrypsinogen B-like%2C transcript variant X2	gene33328	0	664
ort001268	XP_001661622.1	uncharacterized LOC5574731	gene8479	0	1159	XP_019529529.1	uncharacterized LOC109401431%2C transcript variant X1	gene33334	0	1159
ort001269	XP_021705513.1	glutamate [NMDA] receptor subunit 1%2C transcript variant X1	gene14612	0	1971	XP_019529544.1	glutamate [NMDA] receptor subunit 1-like	gene33341	0	1971
ort001270	XP_021698220.1	gamma-1-syntrophin	gene6545	0	1049	XP_019529548.1	gamma-1-syntrophin-like%2C transcript variant X2	gene3747	0	1049
ort001271	XP_021707001.1	G protein-activated inward rectifier potassium channel 3%2C transcript variant X6	gene12312	0	810	XP_019529553.1	G protein-activated inward rectifier potassium channel 3-like%2C transcript variant X3	gene33400	0	794
ort001272	XP_001653531.1	G protein-activated inward rectifier potassium channel 3%2C transcript variant X3	gene12311	0	934	XP_019529555.1	G protein-activated inward rectifier potassium channel 3%2C transcript variant X3	gene33403	0	934
ort001273	XP_021707006.1	G protein-activated inward rectifier potassium channel 3%2C transcript variant X3	gene12311	0	734	XP_019529556.1	G protein-activated inward rectifier potassium channel 3%2C transcript variant X3	gene33403	0	734
ort001274	XP_021710336.1	sodium-independent sulfate anion transporter%2C transcript variant X3	gene12340	0	1172	XP_019529565.1	sodium-independent sulfate anion transporter%2C transcript variant X3	gene33374	0	1172
ort001275	XP_001648900.1	zinc finger MYM-type protein 4%2C transcript variant X3	gene12318	0	2863	XP_019529572.1	zinc finger MYM-type protein 4	gene33393	0	2882
ort001276	XP_001655011.1	protein RRP5 homolog	gene12350	0	2497	XP_019529573.1	protein RRP5 homolog	gene33355	0	2507
ort001277	XP_021698227.1	semaphorin-2A%2C transcript variant X1	gene6547	0	1393	XP_019529574.1	semaphorin-2A%2C transcript variant X1	gene3751	0	1393
ort001278	XP_001655003.1	probable proline--tRNA ligase%2C mitochondrial	gene12344	0	816	XP_019529591.1	probable proline--tRNA ligase%2C mitochondrial	gene33372	0	816
ort001279	XP_021698208.1	odorant receptor 63a%2C transcript variant X3	gene6535	0	557	XP_019529593.1	odorant receptor 63a	gene3736	0	557
ort001280	XP_021709631.1	eukaryotic translation initiation factor 2 subunit 3%2C transcript variant X2	gene12348	0	1321	XP_019529596.1	eukaryotic translation initiation factor 2 subunit 3%2C transcript variant X1	gene33361	0	1294
ort001281	XP_021709632.1	eukaryotic translation initiation factor 2 subunit 3%2C transcript variant X2	gene12348	0	959	XP_019529597.1	eukaryotic translation initiation factor 2 subunit 3%2C transcript variant X1	gene33361	0	959
ort001282	XP_001655020.1	isocitrate dehydrogenase [NAD] subunit gamma%2C mitochondrial%2C transcript variant X1	gene12358	0	783	XP_019529607.1	isocitrate dehydrogenase [NAD] subunit gamma%2C mitochondrial%2C transcript variant X1	gene33344	0	783
ort001283	XP_021711646.1	mucin-5AC-like%2C transcript variant X2	gene12360	3e-09	56.2	XP_019529609.1	uncharacterized LOC109401489	gene33345	8e-18	79.3
ort001284	XP_021711647.1	mucin-5AC-like%2C transcript variant X2	gene12360	2e-10	59.7	XP_019529610.1	uncharacterized LOC109401490	gene33346	2e-08	52.8
ort001285	XP_001655006.1	protein SET	gene12347	2e-179	493	XP_019529614.1	protein SET-like%2C transcript variant X1	gene33364	1e-179	493
ort001286	XP_001653528.1	G protein-activated inward rectifier potassium channel 3	gene12310	0	919	XP_019529620.1	G protein-activated inward rectifier potassium channel 4-like	gene33404	0	933
ort001287	XP_001649360.1	uncharacterized LOC5565020	gene12331	2e-178	497	XP_019529628.1	uncharacterized LOC109401504	gene33382	0	633
ort001288	XP_001649358.1	uncharacterized LOC5565018	gene12333	0	499	XP_019529629.1	uncharacterized LOC109401505	gene33379	0	499
ort001289	XP_021707668.1	uncharacterized LOC5564551	gene12320	0	613	XP_019529631.1	uncharacterized LOC109401508	gene33391	0	602
ort001290	XP_001648906.1	uncharacterized LOC5564560%2C transcript variant X1	gene12323	2e-110	332	XP_019529632.1	uncharacterized LOC109401509	gene33388	5e-113	338
ort001291	XP_021705116.1	uncharacterized LOC5578483%2C transcript variant X5	gene15074	0	2137	XP_019529634.1	uncharacterized LOC109401514	gene33431	0	2137
ort001292	XP_001660992.1	uncharacterized LOC5573670	gene6539	4e-89	254	XP_019529644.1	uncharacterized LOC109401521	gene3740	3e-89	254
ort001293	XP_001660991.1	cilia- and flagella-associated protein 20	gene6540	0	501	XP_019529653.1	cilia- and flagella-associated protein 20-like	gene3741	0	501
ort001294	XP_001657237.1	RNA-binding protein lark	gene15085	0	665	XP_019529656.1	RNA-binding protein lark-like	gene33444	0	665
ort001295	XP_001651742.1	DNA-directed RNA polymerase II subunit RPB1	gene15061	9e-135	384	XP_019529672.1	putative protein TPRXL	gene33411	3e-140	398
ort001296	XP_021707467.1	phospholipase B1%2C membrane-associated%2C transcript variant X1	gene15064	0	520	XP_019529677.1	phospholipase B1%2C membrane-associated-like%2C transcript variant X3	gene33412	0	521
ort001297	XP_021708086.1	MOXD1 homolog 1	gene14950	0	1268	XP_019529679.1	MOXD1 homolog 1-like	gene3753	0	1268
ort001298	XP_001659019.2	uncharacterized LOC5570239	gene15079	0	627	XP_019529680.1	uncharacterized LOC109401564	gene33437	0	599
ort001299	XP_001651505.2	integrator complex subunit 8	gene14948	0	1988	XP_019529690.1	integrator complex subunit 8	gene3755	0	1988
ort001300	XP_021707950.1	beta-arrestin-1%2C transcript variant X13	gene16211	0	946	XP_019529696.1	beta-arrestin-1%2C transcript variant X4	gene33472	0	946
ort001301	XP_001663900.2	trypsin-1	gene16212	2e-139	392	XP_019529704.1	trypsin-4-like	gene33479	2e-132	374
ort001302	XP_001662138.2	peptidyl-prolyl cis-trans isomerase-like 2	gene16223	0	1065	XP_019529716.1	peptidyl-prolyl cis-trans isomerase-like 2	gene33466	0	1065
ort001303	XP_001662140.2	MIEF1 upstream open reading frame protein	gene16225	2e-40	127	XP_019529718.1	probable peptide chain release factor C12orf65 homolog%2C mitochondrial%2C transcript variant X1	gene33465	1e-40	127
ort001304	XP_001662137.2	uncharacterized LOC5575688%2C transcript variant X1	gene16221	0	1649	XP_019529720.1	uncharacterized LOC109401600	gene33471	0	1649
ort001305	XP_001657422.1	checkpoint protein HUS1	gene16210	0	533	XP_019529727.1	checkpoint protein HUS1-like	gene33480	0	533
ort001306	XP_021709997.1	protein PFC0760c-like	gene15313	3e-152	432	XP_019529733.1	protein PFC0760c-like	gene33568	6e-158	446
ort001307	XP_001662443.1	splicing factor U2AF 50 kDa subunit	gene13494	0	839	XP_019529735.1	splicing factor U2AF 50 kDa subunit-like	gene33572	0	839
ort001308	XP_001651508.2	succinate dehydrogenase assembly factor 2%2C mitochondrial-like	gene19404	1e-102	291	XP_019529739.1	succinate dehydrogenase assembly factor 2%2C mitochondrial	gene3759	7e-103	291
ort001309	XP_001649560.1	pupal cuticle protein Edg-78E	gene15299	2e-70	207	XP_019529740.1	pupal cuticle protein Edg-78E-like	gene33553	3e-57	173
ort001310	XP_001649565.2	peroxisomal (S)-2-hydroxy-acid oxidase GLO2	gene15304	0	673	XP_019529742.1	peroxisomal (S)-2-hydroxy-acid oxidase GLO2-like	gene33559	0	673
ort001311	XP_021709074.1	probable phospholipid-transporting ATPase IA%2C transcript variant X11	gene15277	0	2190	XP_019529747.1	probable phospholipid-transporting ATPase IA%2C transcript variant X3	gene33525	0	2190
ort001312	XP_001651510.2	exosome complex exonuclease RRP42	gene14941	0	605	XP_019529750.1	exosome complex exonuclease RRP42-like	gene3761	0	605
ort001313	XP_021705011.1	oligodendrocyte-myelin glycoprotein	gene15294	0	540	XP_019529759.1	oligodendrocyte-myelin glycoprotein-like	gene33544	0	540
ort001314	XP_021705322.1	probable endochitinase	gene15307	3e-89	259	XP_019529769.1	probable endochitinase	gene33563	3e-81	239
ort001315	XP_021711561.1	serine-arginine protein 55-like	gene15260	6e-151	430	XP_019529771.1	serine-arginine protein 55	gene33508	1e-141	406
ort001316	XP_001650998.2	matrix metalloproteinase-2	gene15258	2e-108	307	XP_019529772.1	matrix metalloproteinase-2-like	gene33506	1e-108	307
ort001317	XP_001650970.2	BSD domain-containing protein 1-A%2C transcript variant X1	gene15289	0	698	XP_019529773.1	BSD domain-containing protein 1-A-like%2C transcript variant X1	gene33541	0	688
ort001318	XP_001649558.1	transcriptional adapter 3	gene15297	0	991	XP_019529777.1	transcriptional adapter 3-like%2C transcript variant X3	gene33551	0	991
ort001319	XP_001651511.1	uncharacterized LOC5579836	gene14940	1e-115	330	XP_019529778.1	uncharacterized LOC109401656	gene3763	9e-134	375
ort001320	XP_021706966.1	uncharacterized LOC5565214	gene15302	7e-108	308	XP_019529780.1	uncharacterized LOC109401659%2C transcript variant X2	gene33557	5e-108	308
ort001321	XP_001649562.2	uncharacterized LOC5565231	gene15301	3e-128	360	XP_019529782.1	uncharacterized LOC109401660	gene33556	2e-128	360
ort001322	XP_021710751.1	beta-glucuronidase%2C transcript variant X3	gene15255	0	1400	XP_019529787.1	beta-glucuronidase-like%2C transcript variant X3	gene33503	0	1400
ort001323	XP_001650999.1	zinc finger HIT domain-containing protein 3	gene15254	4e-83	240	XP_019529790.1	zinc finger HIT domain-containing protein 3	gene33502	3e-83	240
ort001324	XP_021704765.1	matrix metalloproteinase-2%2C transcript variant X1	gene15265	0	931	XP_019529795.1	matrix metalloproteinase-16-like	gene33514	0	958
ort001325	XP_001649556.1	elongin-C%2C transcript variant X2	gene15295	1e-83	240	XP_019529798.1	transcription elongation factor B polypeptide 1%2C transcript variant X1	gene33548	9e-84	240
ort001326	XP_021710455.1	E3 ubiquitin-protein ligase SH3RF1%2C transcript variant X1	gene15280	0	1474	XP_019529799.1	E3 ubiquitin-protein ligase SH3RF1-like%2C transcript variant X5	gene33533	0	1492
ort001327	XP_021710453.1	E3 ubiquitin-protein ligase SH3RF1%2C transcript variant X1	gene15280	0	1474	XP_019529801.1	E3 ubiquitin-protein ligase SH3RF1-like%2C transcript variant X5	gene33533	0	1492
ort001328	XP_001650982.2	transcription factor grauzone	gene15279	0	1055	XP_019529808.1	zinc finger and SCAN domain-containing protein 2-like	gene33530	0	1065
ort001329	XP_001650988.2	nuclear pore glycoprotein p62	gene15274	2e-93	273	XP_019529810.1	nuclear pore glycoprotein p62-like	gene33523	4e-93	273
ort001330	XP_021704540.1	putative transcription factor SOX-15	gene15284	0	1353	XP_019529811.1	putative transcription factor SOX-15	gene33536	0	1586
ort001331	XP_021704543.1	basement membrane proteoglycan%2C transcript variant X1	gene15287	0	743	XP_019529813.1	basement membrane proteoglycan-like	gene33538	0	743
ort001332	XP_001650977.2	basement membrane-specific heparan sulfate proteoglycan core protein	gene15286	1e-155	443	XP_019529814.1	laminin subunit alpha-1	gene33537	8e-156	443
ort001333	XP_021705326.1	inactive rhomboid protein 1%2C transcript variant X2	gene13368	0	1060	XP_019529816.1	inactive rhomboid protein 1-like%2C transcript variant X2	gene33565	0	1069
ort001334	XP_021707046.1	vesicular inhibitory amino acid transporter	gene15290	0	1153	XP_019529818.1	vesicular inhibitory amino acid transporter-like	gene33542	0	1153
ort001335	XP_001650995.2	E3 ubiquitin-protein ligase TRIM37	gene15267	0	772	XP_019529826.1	E3 ubiquitin-protein ligase TRIM37-like	gene33515	0	772
ort001336	XP_021696988.1	uncharacterized LOC110675671	gene8614	4e-47	159	XP_019529830.1	uncharacterized LOC109401704	gene33590	4e-56	182
ort001337	XP_021700836.1	nuclear receptor-binding protein homolog%2C transcript variant X3	gene8617	0	1122	XP_019529832.1	nuclear receptor-binding protein homolog%2C transcript variant X5	gene33587	0	1122
ort001338	XP_021700838.1	nuclear pore complex protein Nup155	gene8619	0	2858	XP_019529839.1	nuclear pore complex protein Nup155-like	gene33584	0	2858
ort001339	XP_021700822.1	protein decapentaplegic%2C transcript variant X1	gene8606	0	839	XP_019529842.1	protein decapentaplegic-like	gene33598	0	855
ort001340	XP_021700837.1	mitochondrial Rho GTPase	gene8618	0	1355	XP_019529844.1	mitochondrial Rho GTPase%2C transcript variant X2	gene33586	0	1355
ort001341	XP_001654164.2	uncharacterized LOC5572665	gene8621	9e-94	270	XP_019529849.1	sepiapterin reductase-like%2C transcript variant X2	gene33583	7e-94	270
ort001342	XP_021700826.1	pancreatic triacylglycerol lipase%2C transcript variant X1	gene8610	0	737	XP_019529853.1	pancreatic triacylglycerol lipase-like%2C transcript variant X3	gene33594	0	737
ort001343	XP_001654157.2	vesicular glutamate transporter 1	gene8611	0	1214	XP_019529858.1	vesicular glutamate transporter 1-like	gene33593	0	1214
ort001344	XP_001654154.1	glycerate kinase%2C transcript variant X2	gene8608	0	808	XP_019529859.1	glycerate kinase-like	gene33596	0	793
ort001345	XP_021700824.1	pancreatic lipase-related protein 2	gene8609	0	655	XP_019529861.1	pancreatic lipase-related protein 2-like	gene33595	0	655
ort001346	XP_021699107.1	uncharacterized LOC5566135	gene4390	7e-78	254	XP_019529868.1	transmembrane channel-like protein 3	gene33602	5e-77	253
ort001347	XP_021711622.1	uncharacterized LOC110679879	gene13812	0	1571	XP_019529872.1	uncharacterized LOC109401732	gene33606	0	1595
ort001348	XP_021710057.1	uncharacterized LOC5566741	gene13952	0	1803	XP_019529882.1	uncharacterized LOC109401743	gene33619	0	1873
ort001349	XP_001651150.1	trypsin alpha-3	gene13953	0	499	XP_019529890.1	trypsin alpha-3-like%2C transcript variant X2	gene33622	0	499
ort001350	XP_001651144.1	trypsin-7	gene13959	0	510	XP_019529891.1	trypsin-7-like	gene33626	0	510
ort001351	XP_021709049.1	flocculation protein FLO11-like	gene13995	0	915	XP_019529892.1	flocculation protein FLO11-like	gene33655	0	1022
ort001352	XP_021709821.1	proton-coupled amino acid transporter-like protein CG1139%2C transcript variant X2	gene14934	0	785	XP_019529899.1	proton-coupled amino acid transporter-like protein CG1139%2C transcript variant X1	gene3771	0	768
ort001353	XP_021705880.1	uncharacterized LOC5566729	gene13964	0	2231	XP_019529900.1	ATP-dependent DNA helicase Q5-like	gene33630	0	2287
ort001354	XP_021705883.1	bifunctional 3'-phosphoadenosine 5'-phosphosulfate synthase%2C transcript variant X2	gene13967	0	1245	XP_019529901.1	bifunctional 3'-phosphoadenosine 5'-phosphosulfate synthase 2%2C transcript variant X1	gene33631	0	1245
ort001355	XP_021705882.1	bifunctional 3'-phosphoadenosine 5'-phosphosulfate synthase%2C transcript variant X2	gene13967	0	1246	XP_019529902.1	bifunctional 3'-phosphoadenosine 5'-phosphosulfate synthase 2%2C transcript variant X1	gene33631	0	1245
ort001356	XP_021708197.1	GTPase HRas%2C transcript variant X3	gene13987	9e-142	393	XP_019529914.1	GTPase HRas%2C transcript variant X3	gene33645	7e-142	393
ort001357	XP_021708201.1	GTPase HRas%2C transcript variant X3	gene13987	9e-142	393	XP_019529920.1	GTPase HRas%2C transcript variant X3	gene33645	7e-142	393
ort001358	XP_021709649.1	UTP--glucose-1-phosphate uridylyltransferase%2C transcript variant X1	gene13968	0	1023	XP_019529927.1	UTP--glucose-1-phosphate uridylyltransferase%2C transcript variant X1	gene33632	0	1023
ort001359	XP_021704940.1	uncharacterized LOC5575802%2C transcript variant X1	gene13977	0	904	XP_019529932.1	uncharacterized LOC109401775%2C transcript variant X1	gene33640	0	951
ort001360	XP_021705389.1	probable serine/threonine-protein kinase kinX%2C transcript variant X1	gene13979	0	779	XP_019529938.1	nucleolar and coiled-body phosphoprotein 1	gene33643	0	796
ort001361	XP_021705392.1	uncharacterized LOC110677892	gene13980	2e-173	489	XP_019529939.1	uncharacterized LOC109401780	gene33644	1e-173	489
ort001362	XP_021705457.1	probable phospholipid hydroperoxide glutathione peroxidase%2C transcript variant X1	gene13991	2e-143	398	XP_019529940.1	probable phospholipid hydroperoxide glutathione peroxidase%2C transcript variant X1	gene33653	1e-143	398
ort001363	XP_001662231.1	ubiquitin-like protein 7	gene13981	0	707	XP_019529942.1	ubiquitin-like protein 7	gene33650	0	688
ort001364	XP_001657001.1	methionine synthase reductase	gene18677	0	896	XP_019529943.1	methionine synthase reductase-like	gene33659	0	896
ort001365	XP_001651141.1	glycerophosphodiester phosphodiesterase 1	gene13963	0	689	XP_019529945.1	glycerophosphodiester phosphodiesterase 1-like	gene33629	0	689
ort001366	XP_001657000.2	methionine synthase reductase	gene18676	0	728	XP_019529949.1	methionine synthase reductase-like	gene33660	0	728
ort001367	XP_021708279.1	trypsin delta	gene13962	0	523	XP_019529954.1	trypsin delta/gamma-like	gene33628	0	523
ort001368	XP_021706541.1	uncharacterized LOC110678230	gene16952	4e-69	210	XP_019529960.2	histone H4	gene33669	2e-69	210
ort001369	XP_001651523.2	O-acyltransferase like protein	gene14930	0	698	XP_019529975.1	O-acyltransferase like protein-like%2C transcript variant X1	gene3774	0	698
ort001370	XP_001663868.2	uncharacterized LOC5578404	gene18587	4e-66	197	XP_019529982.1	uncharacterized LOC109401824	gene33674	1e-59	180
ort001371	XP_001653087.2	40S ribosomal protein SA	gene927	0	580	XP_019529983.1	40S ribosomal protein SA	gene33676	0	580
ort001372	XP_021693415.1	DNA excision repair protein ERCC-1	gene930	1e-154	431	XP_019529987.1	DNA excision repair protein ERCC-1-like	gene33673	5e-152	424
ort001373	XP_001648875.1	mediator of RNA polymerase II transcription subunit 10	gene890	5e-91	259	XP_019529998.1	mediator of RNA polymerase II transcription subunit 10	gene33726	4e-91	259
ort001374	XP_021707817.1	zinc finger BED domain-containing protein 4%2C transcript variant X3	gene16334	2e-86	283	XP_019530000.1	zinc finger BED domain-containing protein 1-like	gene33757	1e-86	283
ort001375	XP_001654582.2	uncharacterized LOC5573408	gene861	0	623	XP_019530001.1	uncharacterized LOC109401849	gene33758	0	623
ort001376	XP_021712703.1	sodium channel protein Nach	gene852	0	752	XP_019530003.1	sodium channel protein Nach-like	gene33768	0	758
ort001377	XP_021706907.1	zinc finger protein 43-like%2C transcript variant X2	gene16690	1e-179	528	XP_019530009.1	zinc finger protein 791-like	gene3777	0	566
ort001378	XP_001660079.2	uncharacterized LOC5571977	gene848	0	2486	XP_019530016.1	uncharacterized LOC109401875	gene33774	0	2518
ort001379	XP_021712460.1	ubiquitin carboxyl-terminal hydrolase MINDY-3 homolog%2C transcript variant X1	gene849	0	865	XP_019530017.1	ubiquitin carboxyl-terminal hydrolase FAM188A homolog	gene33773	0	872
ort001380	XP_021692916.1	eukaryotic translation initiation factor 4B%2C transcript variant X1	gene898	0	759	XP_019530018.1	eukaryotic translation initiation factor 4B-like%2C transcript variant X1	gene33714	0	807
ort001381	XP_001662035.1	histone H1A%2C sperm	gene16691	5e-89	260	XP_019530020.1	histone H1A%2C sperm-like	gene3779	5e-89	259
ort001382	XP_021693376.1	serine/threonine-protein kinase Doa%2C transcript variant X12	gene926	0	749	XP_019530022.1	serine/threonine-protein kinase Doa-like%2C transcript variant X2	gene33680	0	747
ort001383	XP_021713087.1	Ca(2+)/calmodulin-responsive adenylate cyclase%2C transcript variant X1	gene871	0	3289	XP_019530025.1	Ca(2+)/calmodulin-responsive adenylate cyclase%2C transcript variant X3	gene33746	0	3296
ort001384	XP_021713334.1	nuclear pore complex protein Nup205	gene887	0	3943	XP_019530030.1	nuclear pore complex protein Nup205	gene33727	0	3943
ort001385	XP_001653091.2	trypsin alpha-3	gene923	7e-162	453	XP_019530032.1	trypsin alpha-3-like	gene33682	5e-162	453
ort001386	XP_001662034.1	histone H1	gene16692	1e-46	153	XP_019530033.1	histone H1A%2C sperm	gene3778	2e-87	256
ort001387	XP_021712546.1	uncharacterized LOC5576059	gene850	0	1999	XP_019530044.1	uncharacterized LOC109401891	gene33769	0	2003
ort001388	XP_021713292.1	uncharacterized LOC5564154%2C transcript variant X3	gene884	0	1068	XP_019530046.1	uncharacterized LOC109401892%2C transcript variant X2	gene33732	0	1073
ort001389	XP_001648484.2	protein phosphatase 1H	gene885	0	1141	XP_019530048.1	protein phosphatase 1H	gene33733	0	1141
ort001390	XP_001648485.2	clusterin-associated protein 1	gene883	0	855	XP_019530049.1	clusterin-associated protein 1	gene33734	0	855
ort001391	XP_001653102.2	glycosaminoglycan xylosylkinase homolog	gene911	0	783	XP_019530050.1	glycosaminoglycan xylosylkinase homolog	gene33696	0	794
ort001392	XP_021693098.1	BLOC-1-related complex subunit 5	gene909	0	598	XP_019530051.1	uncharacterized LOC109401896	gene33698	0	599
ort001393	XP_021693114.1	uncharacterized LOC5570124	gene910	0	515	XP_019530052.1	uncharacterized LOC109401897%2C transcript variant X1	gene33700	0	551
ort001394	XP_021692954.1	activin receptor type-2A%2C transcript variant X3	gene901	0	998	XP_019530056.1	activin receptor type-2B-like%2C transcript variant X4	gene33707	0	968
ort001395	XP_001654581.2	UV excision repair protein RAD23 homolog B	gene862	7e-174	487	XP_019530060.1	UV excision repair protein RAD23 homolog B	gene33756	2e-176	493
ort001396	XP_001654585.1	histidine--tRNA ligase%2C cytoplasmic%2C transcript variant X1	gene858	0	963	XP_019530061.1	histidine--tRNA ligase%2C cytoplasmic%2C transcript variant X1	gene33762	0	963
ort001397	XP_021713331.1	cytosolic endo-beta-N-acetylglucosaminidase%2C transcript variant X2	gene886	0	1150	XP_019530064.1	cytosolic endo-beta-N-acetylglucosaminidase%2C transcript variant X1	gene33728	0	1150
ort001398	XP_021712979.1	protein SPT2 homolog	gene860	0	877	XP_019530067.1	protein SPT2 homolog	gene33759	0	873
ort001399	XP_021713271.1	adenylate cyclase type 9%2C transcript variant X2	gene882	0	3003	XP_019530069.1	adenylate cyclase type 9	gene33736	0	3003
ort001400	XP_001660081.1	coactosin-like protein	gene845	1e-120	337	XP_019530070.1	coactosin-like protein%2C transcript variant X2	gene33777	8e-121	337
ort001401	XP_021713347.1	phosphatidylglycerophosphatase and protein-tyrosine phosphatase 1%2C transcript variant X2	gene888	4e-155	430	XP_019530072.1	phosphatidylglycerophosphatase and protein-tyrosine phosphatase 1%2C transcript variant X2	gene33723	3e-155	430
ort001402	XP_021713351.1	phosphatidylglycerophosphatase and protein-tyrosine phosphatase 1%2C transcript variant X2	gene888	4e-147	408	XP_019530073.1	phosphatidylglycerophosphatase and protein-tyrosine phosphatase 1%2C transcript variant X2	gene33723	3e-147	408
ort001403	XP_021713360.1	succinate dehydrogenase [ubiquinone] cytochrome b small subunit%2C mitochondrial	gene889	2e-122	343	XP_019530074.1	succinate dehydrogenase [ubiquinone] cytochrome b small subunit%2C mitochondrial	gene33724	1e-122	343
ort001404	XP_021693147.1	bifunctional arginine demethylase and lysyl-hydroxylase PSR	gene915	0	808	XP_019530075.1	bifunctional arginine demethylase and lysyl-hydroxylase PSR-like	gene33691	0	808
ort001405	XP_021712942.1	sin3 histone deacetylase corepressor complex component SDS3	gene857	0	546	XP_019530077.1	sin3 histone deacetylase corepressor complex component SDS3	gene33763	0	547
ort001406	XP_021693032.1	uncharacterized LOC5578654%2C transcript variant X9	gene905	0	633	XP_019530081.1	uncharacterized LOC109401916%2C transcript variant X4	gene33703	0	633
ort001407	XP_001653905.2	brahma-associated protein of 60 kDa	gene897	0	1040	XP_019530082.1	brahma-associated protein of 60 kDa-like	gene33715	0	1040
ort001408	XP_021713378.1	uncharacterized LOC110681571	gene891	0	2064	XP_019530083.1	uncharacterized LOC109401918	gene33720	0	2125
ort001409	XP_021711962.1	hydroxyacylglutathione hydrolase%2C mitochondrial%2C transcript variant X2	gene844	0	545	XP_019530087.1	hydroxyacylglutathione hydrolase%2C mitochondrial%2C transcript variant X1	gene33778	0	545
ort001410	XP_001662401.2	fatty acid hydroxylase domain-containing protein 2	gene878	0	680	XP_019530088.1	fatty acid hydroxylase domain-containing protein 2-like	gene33739	0	680
ort001411	XP_021713213.1	phosphoglycolate phosphatase 1B%2C chloroplastic	gene877	0	545	XP_019530089.1	phosphoglycolate phosphatase 2	gene33740	0	545
ort001412	XP_001662400.2	fatty acid hydroxylase domain-containing protein 2	gene879	0	595	XP_019530090.1	fatty acid hydroxylase domain-containing protein 2-like	gene33738	0	595
ort001413	XP_001654587.1	40S ribosomal protein S10b	gene856	1e-113	319	XP_019530091.1	40S ribosomal protein S10b	gene33764	9e-114	319
ort001414	XP_001653095.2	myeloblastin	gene918	5e-145	409	XP_019530094.1	myeloblastin-like	gene33689	4e-145	409
ort001415	XP_021713005.1	LIM domain transcription factor LMO4%2C transcript variant X1	gene863	3e-154	433	XP_019530096.1	LIM domain transcription factor LMO4.1%2C transcript variant X2	gene33755	1e-166	464
ort001416	XP_021713012.1	LIM domain transcription factor LMO4%2C transcript variant X1	gene863	3e-154	433	XP_019530097.1	LIM domain transcription factor LMO4.1%2C transcript variant X2	gene33755	1e-166	464
ort001417	XP_021713019.1	LIM domain transcription factor LMO4%2C transcript variant X1	gene863	1e-151	426	XP_019530098.1	LIM domain transcription factor LMO4.1%2C transcript variant X2	gene33755	4e-164	457
ort001418	XP_021713098.1	dentin sialophosphoprotein%2C transcript variant X2	gene872	0	992	XP_019530100.1	uncharacterized LOC109401929%2C transcript variant X2	gene33745	0	996
ort001419	XP_021713061.1	tumor necrosis factor receptor superfamily member wengen	gene867	2e-173	488	XP_019530102.1	tumor necrosis factor receptor superfamily member wengen	gene33747	0	514
ort001420	XP_001654584.1	RING finger protein 141	gene859	0	503	XP_019530103.1	RING finger protein 141-like	gene33761	0	523
ort001421	XP_001660080.1	replication factor C subunit 5	gene846	0	678	XP_019530106.1	replication factor C subunit 5	gene33776	0	678
ort001422	XP_021693140.1	zinc finger protein 710-like	gene916	0	556	XP_019530109.1	zinc finger and SCAN domain-containing protein 2-like%2C transcript variant X2	gene33690	0	580
ort001423	XP_021702865.1	phosphatidylinositol 4-phosphate 5-kinase type-1 alpha%2C transcript variant X11	gene10407	0	997	XP_019530110.1	phosphatidylinositol 4-phosphate 5-kinase type-1 alpha%2C transcript variant X2	gene3876	0	1003
ort001424	XP_021712772.1	uncharacterized LOC110681295%2C transcript variant X2	gene853	0	1337	XP_019530113.1	uncharacterized LOC109401938	gene33766	0	1326
ort001425	XP_021692974.1	serine-rich adhesin for platelets%2C transcript variant X1	gene902	0	511	XP_019530114.1	uncharacterized serine-rich protein C215.13-like	gene33705	0	520
ort001426	XP_021693260.1	caldesmon	gene925	8e-135	380	XP_019530117.1	caldesmon-like	gene33681	3e-140	394
ort001427	XP_021713129.1	AH receptor-interacting protein%2C transcript variant X3	gene873	0	619	XP_019530118.1	AH receptor-interacting protein	gene33743	0	619
ort001428	XP_001663993.2	putative fatty acyl-CoA reductase CG5065	gene908	0	1096	XP_019530120.1	putative fatty acyl-CoA reductase CG5065	gene33701	0	1096
ort001429	XP_021708781.1	dehydrogenase/reductase SDR family member on chromosome X	gene16400	0	691	XP_019530131.1	dehydrogenase/reductase SDR family member on chromosome X-like	gene3882	0	692
ort001430	XP_021711098.1	uncharacterized LOC5578012	gene12711	0	545	XP_019530132.1	uncharacterized threonine-rich GPI-anchored glycoprotein PJ4664.02-like	gene33813	0	551
ort001431	XP_021704857.1	signal recognition particle subunit SRP72%2C transcript variant X1	gene12717	0	1321	XP_019530134.1	signal recognition particle subunit SRP72	gene33819	0	1321
ort001432	XP_021705544.1	60S ribosomal protein L13	gene12744	1e-156	432	XP_019530136.1	60S ribosomal protein L13	gene33800	8e-157	432
ort001433	XP_001656750.1	phospholipid phosphatase 5	gene12713	0	554	XP_019530137.1	phospholipid phosphatase 5	gene33814	0	554
ort001434	XP_001656748.2	acylpyruvase FAHD1%2C mitochondrial	gene12715	8e-155	428	XP_019530138.1	acylpyruvase FAHD1%2C mitochondrial-like	gene33815	6e-155	428
ort001435	XP_001656743.2	protein spartin	gene12719	0	1054	XP_019530140.1	protein spartin-like	gene33822	0	1078
ort001436	XP_021708783.1	elongation of very long chain fatty acids protein 7%2C transcript variant X3	gene16399	0	572	XP_019530142.1	elongation of very long chain fatty acids protein 7-like	gene3878	0	610
ort001437	XP_021705810.1	uncharacterized LOC5565978%2C transcript variant X7	gene12746	0	1184	XP_019530143.1	uncharacterized LOC109401978	gene33792	0	1184
ort001438	XP_021708496.1	tankyrase%2C transcript variant X1	gene12722	0	2436	XP_019530154.1	tankyrase	gene33829	0	2436
ort001439	XP_001656768.1	attacin-B	gene12694	2e-141	398	XP_019530162.1	attacin-B-like	gene33869	2e-135	383
ort001440	XP_021708497.1	homeobox protein goosecoid	gene12724	6e-89	284	XP_019530175.1	homeobox protein goosecoid-like	gene33830	0	586
ort001441	XP_021709962.1	axin%2C transcript variant X10	gene12731	0	1318	XP_019530177.1	axin-like	gene33842	0	1292
ort001442	XP_001656734.1	60S ribosomal protein L32	gene12730	3e-93	265	XP_019530180.1	60S ribosomal protein L32	gene33843	3e-93	265
ort001443	XP_001656735.1	zinc finger protein 622	gene12729	0	712	XP_019530184.1	zinc finger protein 622-like	gene33844	0	716
ort001444	XP_001656757.2	60 kDa SS-A/Ro ribonucleoprotein homolog	gene12707	0	780	XP_019530185.1	60 kDa SS-A/Ro ribonucleoprotein-like	gene33849	0	780
ort001445	XP_001656767.1	dnaJ homolog subfamily B member 14	gene12696	0	715	XP_019530186.1	dnaJ homolog subfamily B member 14-like	gene33868	0	694
ort001446	XP_001656760.1	uncharacterized LOC5578020	gene12705	1e-127	362	XP_019530188.1	uncharacterized LOC109402040	gene33852	7e-128	362
ort001447	XP_001658062.2	otopetrin-2%2C transcript variant X2	gene1233	0	1415	XP_019530199.1	otopetrin-2-like	gene33893	0	1415
ort001448	XP_021697169.1	uncharacterized LOC110675741	gene1242	1e-50	158	XP_019530212.1	uncharacterized LOC109402069	gene33884	5e-47	149
ort001449	XP_001649184.2	uncharacterized LOC5564821%2C transcript variant X4	gene1250	2e-60	186	XP_019530214.1	uncharacterized LOC109402072	gene33878	3e-62	190
ort001450	XP_001659154.1	uncharacterized LOC5570450%2C transcript variant X3	gene1219	0	1174	XP_019530217.1	uncharacterized LOC109402074	gene33907	0	1192
ort001451	XP_021697098.1	mitochondrial amidoxime-reducing component 1%2C transcript variant X1	gene1236	0	723	XP_019530234.1	mitochondrial amidoxime-reducing component 1%2C transcript variant X1	gene33890	0	723
ort001452	XP_001648334.2	mitochondrial amidoxime-reducing component 1	gene1237	0	625	XP_019530237.1	mitochondrial amidoxime-reducing component 1-like	gene33889	0	625
ort001453	XP_021697066.1	vesicle-associated membrane protein 7%2C transcript variant X5	gene1234	4e-173	476	XP_019530239.1	vesicle-associated membrane protein 7-like%2C transcript variant X2	gene33891	1e-164	454
ort001454	XP_021697118.1	clumping factor B%2C transcript variant X2	gene1238	0	598	XP_019530241.1	clumping factor B%2C transcript variant X3	gene33888	0	598
ort001455	XP_001648333.1	clumping factor B%2C transcript variant X2	gene1238	0	499	XP_019530243.1	clumping factor B%2C transcript variant X3	gene33888	0	499
ort001456	XP_001658066.2	protein yellow	gene1228	0	1093	XP_019530244.1	protein yellow	gene33898	0	1093
ort001457	XP_001648376.1	cytochrome P450 4g15	gene1894	0	654	XP_019530245.1	cytochrome P450 4g15-like	gene33901	0	635
ort001458	XP_001653081.2	uncharacterized LOC5570094	gene1247	1e-132	373	XP_019530246.1	uncharacterized LOC109402086	gene33880	5e-134	376
ort001459	XP_021703546.1	probable phosphorylase b kinase regulatory subunit beta%2C transcript variant X1	gene11041	0	2338	XP_019530250.1	probable phosphorylase b kinase regulatory subunit beta%2C transcript variant X6	gene3891	0	2338
ort001460	XP_001649177.2	uncharacterized LOC5564822	gene1244	2e-91	264	XP_019530254.1	uncharacterized LOC109402089	gene33882	2e-91	264
ort001461	XP_021703550.1	probable phosphorylase b kinase regulatory subunit beta%2C transcript variant X1	gene11041	0	2216	XP_019530257.1	probable phosphorylase b kinase regulatory subunit beta%2C transcript variant X6	gene3891	0	2216
ort001462	XP_001651210.2	insulin receptor	gene10170	0	1718	XP_019530260.1	insulin receptor	gene33998	0	1718
ort001463	XP_011493295.2	putative gustatory receptor 58a%2C transcript variant X1	gene10176	1e-143	412	XP_019530261.1	uncharacterized LOC109402098	gene34006	2e-129	376
ort001464	XP_021702557.1	rap guanine nucleotide exchange factor 2%2C transcript variant X5	gene10171	0	3073	XP_019530262.1	rap guanine nucleotide exchange factor 2%2C transcript variant X1	gene33999	0	3073
ort001465	XP_021702565.1	rap guanine nucleotide exchange factor 2%2C transcript variant X5	gene10171	0	3021	XP_019530265.1	rap guanine nucleotide exchange factor 2%2C transcript variant X1	gene33999	0	3021
ort001466	XP_001651209.2	venom protease	gene10169	0	696	XP_019530266.1	venom protease	gene33997	0	723
ort001467	XP_001651213.1	caltractin	gene10172	2e-128	358	XP_019530267.1	caltractin-like	gene34000	2e-128	358
ort001468	XP_021702567.1	lysophospholipid acyltransferase 7%2C transcript variant X2	gene10173	0	912	XP_019530268.1	lysophospholipid acyltransferase 7%2C transcript variant X4	gene34002	0	936
ort001469	XP_021702566.1	lysophospholipid acyltransferase 7%2C transcript variant X2	gene10173	0	912	XP_019530270.1	lysophospholipid acyltransferase 7%2C transcript variant X4	gene34002	0	936
ort001470	XP_021702573.1	arrestin domain-containing protein 3	gene10175	0	790	XP_019530274.1	arrestin domain-containing protein 3-like	gene34005	0	790
ort001471	XP_001651208.1	ethanolamine-phosphate cytidylyltransferase%2C transcript variant X4	gene10167	0	755	XP_019530276.1	ethanolamine-phosphate cytidylyltransferase%2C transcript variant X2	gene33996	0	755
ort001472	XP_021702551.1	ectonucleoside triphosphate diphosphohydrolase 5%2C transcript variant X2	gene10166	0	919	XP_019530277.1	ectonucleoside triphosphate diphosphohydrolase 5%2C transcript variant X2	gene33995	0	919
ort001473	XP_001651217.2	sorting nexin-2	gene10177	0	912	XP_019530281.1	sorting nexin-2	gene34008	0	912
ort001474	XP_021702569.1	RING finger and CHY zinc finger domain-containing protein 1%2C transcript variant X2	gene10174	0	563	XP_019530283.1	RING finger and CHY zinc finger domain-containing protein 1	gene34004	0	563
ort001475	XP_001651220.2	protein PRRC1	gene10179	0	647	XP_019530284.1	protein PRRC1-like	gene34011	0	647
ort001476	XP_021706404.1	phosphatidylinositol-glycan biosynthesis class W protein-like	gene13293	0	625	XP_019530289.1	uncharacterized protein At4g17910-like	gene3892	0	603
ort001477	XP_021707501.1	serine protease inhibitor dipetalogastin-like	gene17375	4e-123	350	XP_019530290.1	serine protease inhibitor dipetalogastin-like	gene34014	3e-123	350
ort001478	XP_021704862.1	neurogenic protein mastermind%2C transcript variant X6	gene17357	3e-89	306	XP_019530293.1	neurogenic protein mastermind-like	gene34029	8e-86	296
ort001479	XP_021709462.1	uncharacterized LOC110679357	gene17352	1e-159	461	XP_019530295.1	uncharacterized LOC109402128	gene34032	9e-160	461
ort001480	XP_001657814.1	protein YIPF6	gene11043	1e-167	461	XP_019530297.1	protein YIPF6	gene3893	8e-168	461
ort001481	XP_001661645.1	cytochrome c oxidase subunit 5A%2C mitochondrial	gene17335	4e-99	282	XP_019530299.1	cytochrome c oxidase subunit 5A%2C mitochondrial-like	gene34049	3e-99	282
ort001482	XP_011493603.2	uncharacterized LOC23687549	gene17337	0	593	XP_019530300.1	uncharacterized LOC109402132	gene34046	0	593
ort001483	XP_011492993.1	uncharacterized LOC23687401%2C transcript variant X2	gene4089	0	570	XP_019530301.1	uncharacterized LOC109402133	gene34043	0	570
ort001484	XP_001648027.2	valine--tRNA ligase	gene6278	0	777	XP_019530302.1	valine--tRNA ligase	gene34040	0	784
ort001485	XP_021704602.1	rab proteins geranylgeranyltransferase component A	gene17345	0	1077	XP_019530303.1	rab proteins geranylgeranyltransferase component A	gene34039	0	1077
ort001486	XP_021704867.1	uncharacterized LOC110677777	gene17358	5e-88	253	XP_019530313.1	general odorant-binding protein 99b-like	gene34028	3e-88	253
ort001487	XP_001648935.2	general odorant-binding protein 99b	gene17360	1e-68	204	XP_019530315.1	uncharacterized LOC109402143	gene34024	2e-76	224
ort001488	XP_001648929.2	WD repeat-containing protein 19	gene17350	0	2781	XP_019530316.1	WD repeat-containing protein 19-like	gene34034	0	2781
ort001489	XP_001648927.1	uncharacterized LOC5564576	gene17349	2e-61	184	XP_019530318.1	uncharacterized LOC109402148	gene34036	2e-61	183
ort001490	XP_021703553.1	dual specificity protein phosphatase 3%2C transcript variant X3	gene11045	4e-163	449	XP_019530319.1	dual specificity protein phosphatase 3-like%2C transcript variant X3	gene3895	3e-163	449
ort001491	XP_021705471.1	CD151 antigen%2C transcript variant X2	gene17367	0	650	XP_019530333.1	CD151 antigen-like	gene34019	0	650
ort001492	XP_021694447.1	uncharacterized LOC23687587	gene11	0	2231	XP_019530334.1	uncharacterized LOC109402161	gene34058	0	2231
ort001493	XP_021703555.1	dual specificity protein phosphatase 3%2C transcript variant X3	gene11045	1e-159	439	XP_019530335.1	dual specificity protein phosphatase 3-like%2C transcript variant X3	gene3895	9e-160	439
ort001494	XP_001655856.2	aminopeptidase N%2C transcript variant X1	gene12	0	1785	XP_019530339.1	aminopeptidase N-like	gene34059	0	1801
ort001495	XP_001655854.1	uncharacterized LOC5575827	gene14	5e-117	335	XP_019530345.1	uncharacterized LOC109402169%2C transcript variant X1	gene34061	2e-119	341
ort001496	XP_021694446.1	proton-associated sugar transporter A	gene7	0	1201	XP_019530347.1	proton-associated sugar transporter A	gene34055	0	1209
ort001497	XP_001655857.2	aminopeptidase N%2C transcript variant X3	gene10	0	2017	XP_019530348.1	aminopeptidase N-like	gene34057	0	1984
ort001498	XP_021694244.1	tyramine/octopamine receptor	gene1554	0	777	XP_019530363.1	alpha-2C adrenergic receptor-like	gene34067	0	777
ort001499	XP_021694243.1	paired box protein Pax-6-like	gene1507	2e-121	342	XP_019530372.1	tyrosine-protein phosphatase corkscrew-like	gene34129	1e-121	342
ort001500	XP_021699800.1	probable cytochrome P450 4d14%2C transcript variant X2	gene1518	0	921	XP_019530374.1	probable cytochrome P450 4d14	gene34107	0	921
ort001501	XP_021699817.1	protein FAM107B%2C transcript variant X3	gene1517	7e-124	350	XP_019530379.1	uncharacterized LOC109402203	gene34106	5e-125	353
ort001502	XP_001658675.2	transcription factor btd%2C transcript variant X2	gene1516	0	1248	XP_019530380.1	transcription factor btd%2C transcript variant X2	gene34110	0	1248
ort001503	XP_021700008.1	uncharacterized LOC5564403%2C transcript variant X6	gene1536	0	2283	XP_019530382.1	serine-rich adhesin for platelets-like%2C transcript variant X6	gene34082	0	2284
ort001504	XP_001648746.2	uncharacterized LOC5564403%2C transcript variant X6	gene1536	0	2108	XP_019530388.1	serine-rich adhesin for platelets-like%2C transcript variant X6	gene34082	0	2108
ort001505	XP_001654823.1	obg-like ATPase 1	gene1513	0	802	XP_019530389.1	obg-like ATPase 1	gene34118	0	802
ort001506	XP_011493555.1	ras-related protein Rab-10	gene1512	3e-150	415	XP_019530390.1	ras-related protein Rab-10	gene34120	2e-150	415
ort001507	XP_021699737.1	leucine-rich repeat flightless-interacting protein 2%2C transcript variant X5	gene1510	0	773	XP_019530402.1	leucine-rich repeat flightless-interacting protein 2%2C transcript variant X1	gene34122	0	773
ort001508	XP_021699679.1	uncharacterized LOC5580054%2C transcript variant X2	gene1508	0	3025	XP_019530406.1	PHD finger protein rhinoceros-like%2C transcript variant X1	gene34128	0	3089
ort001509	XP_021699914.1	lachesin%2C transcript variant X3	gene1526	0	887	XP_019530412.1	lachesin%2C transcript variant X1	gene34089	0	871
ort001510	XP_021700053.1	pheromone-processing carboxypeptidase KEX1%2C transcript variant X1	gene1539	6e-136	384	XP_019530413.1	phosphopantothenoylcysteine decarboxylase subunit VHS3-like	gene34080	2e-136	385
ort001511	XP_001648745.1	CDGSH iron-sulfur domain-containing protein 2 homolog	gene1538	4e-95	270	XP_019530414.1	CDGSH iron-sulfur domain-containing protein 2 homolog%2C transcript variant X1	gene34081	3e-95	270
ort001512	XP_021699849.1	endoplasmic reticulum resident protein 44%2C transcript variant X2	gene1520	0	832	XP_019530417.1	endoplasmic reticulum resident protein 44	gene34103	0	832
ort001513	XP_001648736.2	kinesin-like protein KIN-14Q	gene1546	0	1609	XP_019530418.1	kinesin-like protein KIN-14S	gene34073	0	1645
ort001514	XP_021699868.1	proteoglycan 4	gene1525	0	1196	XP_019530421.1	proteoglycan 4-like	gene34102	0	1296
ort001515	XP_001648749.2	vacuolar protein sorting-associated protein 18 homolog	gene1533	0	1881	XP_019530422.1	vacuolar protein sorting-associated protein 18 homolog	gene34086	0	1896
ort001516	XP_001654826.2	dolichyl-diphosphooligosaccharide--protein glycosyltransferase 48 kDa subunit	gene1511	0	892	XP_019530423.1	dolichyl-diphosphooligosaccharide--protein glycosyltransferase 48 kDa subunit	gene34121	0	892
ort001517	XP_001648750.2	uncharacterized protein YdcI	gene1532	0	1793	XP_019530424.1	uncharacterized protein YdcI	gene34087	0	1757
ort001518	XP_021699775.1	transcription factor Sp9	gene1515	0	1030	XP_019530430.1	transcription factor Sp9%2C transcript variant X3	gene34113	0	1030
ort001519	XP_021700110.1	pre-mRNA-processing factor 17	gene1543	0	1164	XP_019530435.1	pre-mRNA-processing factor 17-like	gene34077	0	1165
ort001520	XP_001648735.1	glutathione S-transferase theta-1	gene1549	4e-170	468	XP_019530436.1	glutathione S-transferase theta-1-like	gene34072	3e-170	468
ort001521	XP_021703563.1	transcription factor hamlet%2C transcript variant X6	gene11056	0	1553	XP_019530437.1	transcription factor hamlet-like%2C transcript variant X2	gene3912	0	1603
ort001522	XP_021700252.1	uncharacterized LOC5575879%2C transcript variant X3	gene1551	5e-91	266	XP_019530447.1	uncharacterized LOC109402251%2C transcript variant X4	gene34071	3e-89	261
ort001523	XP_021699950.1	growth arrest-specific protein 8 homolog%2C transcript variant X3	gene1530	0	883	XP_019530448.1	growth arrest-specific protein 8 homolog%2C transcript variant X2	gene34088	0	883
ort001524	XP_001648747.1	uncharacterized LOC5564398	gene1535	5e-169	465	XP_019530450.1	uncharacterized LOC109402253	gene34083	4e-169	465
ort001525	XP_001653821.1	gastrulation defective protein 1 homolog	gene11057	0	1163	XP_019530456.1	gastrulation defective protein 1 homolog	gene3914	0	1221
ort001526	XP_021712494.1	death-associated protein 1-like%2C transcript variant X2	gene19032	1e-65	193	XP_019530459.1	death-associated protein 1-like	gene34143	9e-66	193
ort001527	XP_001648220.1	enoyl-[acyl-carrier-protein] reductase%2C mitochondrial	gene15373	0	674	XP_019530465.1	probable trans-2-enoyl-CoA reductase%2C mitochondrial	gene34146	0	696
ort001528	XP_001662069.2	28S ribosomal protein S31%2C mitochondrial	gene17170	0	618	XP_019530467.1	28S ribosomal protein S31%2C mitochondrial-like	gene414	0	639
ort001529	XP_021709765.1	U6 snRNA-associated Sm-like protein LSm8	gene15371	9e-64	188	XP_019530469.1	U6 snRNA-associated Sm-like protein LSm8%2C transcript variant X1	gene34149	7e-64	188
ort001530	XP_001648237.2	histone H3-like 2	gene15358	8e-47	153	XP_019530470.1	histone H3.3 type a-like	gene34170	7e-52	166
ort001531	XP_021708964.1	uncharacterized LOC110679175	gene15361	2e-116	330	XP_019530471.1	uncharacterized LOC109402275	gene34165	1e-116	330
ort001532	XP_021711359.1	acyl-CoA synthetase family member 3%2C mitochondrial	gene15380	0	1235	XP_019530476.1	acyl-CoA synthetase family member 3%2C mitochondrial	gene34140	0	1235
ort001533	XP_021704771.1	reticulon-4-interacting protein 1 homolog%2C mitochondrial%2C transcript variant X2	gene15364	0	967	XP_019530481.1	reticulon-4-interacting protein 1 homolog%2C mitochondrial%2C transcript variant X2	gene34158	0	967
ort001534	XP_001648230.2	uncharacterized LOC5563908	gene15365	0	700	XP_019530484.1	uncharacterized LOC109402287%2C transcript variant X1	gene34157	0	668
ort001535	XP_001648235.2	protein Teyrha-meyrha%2C transcript variant X3	gene15363	0	1303	XP_019530488.1	protein Teyrha-meyrha-like%2C transcript variant X3	gene34159	0	1303
ort001536	XP_001660217.1	epididymal secretory protein E1	gene15347	2e-98	281	XP_019530505.1	epididymal secretory protein E1-like	gene34183	2e-105	298
ort001537	XP_021707292.1	uncharacterized LOC5570371%2C transcript variant X2	gene15325	0	1670	XP_019530518.1	uncharacterized LOC109402320%2C transcript variant X3	gene34204	0	1670
ort001538	XP_001659077.2	alpha-tocopherol transfer protein-like	gene15327	0	617	XP_019530520.1	alpha-tocopherol transfer protein-like	gene34203	0	617
ort001539	XP_021710717.1	receptor expression-enhancing protein 2	gene15324	0	527	XP_019530531.1	receptor expression-enhancing protein 2-like%2C transcript variant X9	gene34208	0	526
ort001540	XP_021707436.1	centrosomal protein of 83 kDa%2C transcript variant X4	gene15318	0	1146	XP_019530535.1	centrosomal protein of 83 kDa-like%2C transcript variant X6	gene34220	0	1146
ort001541	XP_001659089.2	uncharacterized LOC5570373	gene15338	3e-176	488	XP_019530537.1	uncharacterized LOC109402328	gene34191	6e-171	474
ort001542	XP_021705807.1	baculoviral IAP repeat-containing protein 7%2C transcript variant X3	gene15323	0	961	XP_019530543.1	baculoviral IAP repeat-containing protein 7-B	gene34211	0	986
ort001543	XP_021706824.1	neuropeptide FF receptor 2%2C transcript variant X2	gene15332	0	783	XP_019530544.1	neuropeptide FF receptor 2-like%2C transcript variant X1	gene34198	0	805
ort001544	XP_001659087.2	uncharacterized LOC5570366	gene15336	0	503	XP_019530547.1	uncharacterized LOC109402336%2C transcript variant X2	gene34193	0	503
ort001545	XP_021707064.1	beta-1%2C4-glucuronyltransferase 1	gene15319	0	954	XP_019530549.1	beta-1%2C4-glucuronyltransferase 1-like	gene34215	0	954
ort001546	XP_001659080.1	retinol-binding protein pinta	gene15330	0	608	XP_019530552.1	retinol-binding protein pinta-like	gene34200	0	608
ort001547	XP_021707296.1	alpha-tocopherol transfer protein%2C transcript variant X1	gene15329	0	554	XP_019530553.1	alpha-tocopherol transfer protein-like	gene34201	0	563
ort001548	XP_021710434.1	zinc finger protein 714%2C transcript variant X3	gene15335	0	538	XP_019530555.1	zinc finger protein 79-like	gene34194	0	549
ort001549	XP_021708054.1	neuropeptide FF receptor 2%2C transcript variant X2	gene15333	0	756	XP_019530561.1	neuropeptide FF receptor 2%2C transcript variant X1	gene34197	0	756
ort001550	XP_001653834.1	gamma-butyrobetaine dioxygenase	gene11070	0	832	XP_019530562.1	gamma-butyrobetaine dioxygenase	gene3922	0	832
ort001551	XP_001660218.1	protein NPC2 homolog	gene15348	5e-115	323	XP_019530564.1	protein NPC2 homolog	gene34182	4e-115	323
ort001552	XP_021712628.1	uncharacterized LOC5568728	gene19196	2e-79	258	XP_019530568.1	uncharacterized LOC109402354	gene34224	4e-73	243
ort001553	XP_021703578.1	TGF-beta receptor type-1%2C transcript variant X3	gene11073	0	1102	XP_019530570.1	TGF-beta receptor type-1%2C transcript variant X3	gene3923	0	1081
ort001554	XP_021711767.1	eukaryotic translation initiation factor 3 subunit A-like	gene18117	0	1342	XP_019530571.1	eukaryotic translation initiation factor 3 subunit A	gene34227	0	1244
ort001555	XP_021712557.1	uncharacterized LOC110681097	gene19114	0	691	XP_019530573.1	uncharacterized LOC109402362	gene34232	0	705
ort001556	XP_001649578.2	TGF-beta-activated kinase 1 and MAP3K7-binding protein 1	gene3054	0	809	XP_019530574.1	TGF-beta-activated kinase 1 and MAP3K7-binding protein 1-like	gene34231	0	811
ort001557	XP_021713157.1	endothelin-converting enzyme homolog%2C transcript variant X1	gene3047	0	1565	XP_019530584.1	uncharacterized LOC109402372	gene34225	0	1565
ort001558	XP_021703580.1	TGF-beta receptor type-1%2C transcript variant X3	gene11073	0	986	XP_019530585.1	TGF-beta receptor type-1%2C transcript variant X3	gene3923	0	964
ort001559	XP_021693760.1	ionotropic receptor 40a	gene3992	0	1329	XP_019530586.1	uncharacterized LOC109402376	gene34267	0	1329
ort001560	XP_001655789.2	uncharacterized LOC5575641	gene3982	2e-65	194	XP_019530592.1	uncharacterized LOC109402382	gene34278	1e-65	195
ort001561	XP_001662724.2	zinc finger protein 62	gene3977	0	885	XP_019530594.1	transcription factor Ouib-like	gene34283	0	877
ort001562	XP_021706245.1	F-box/LRR-repeat protein 2-like	gene17171	0	1187	XP_019530602.1	F-box/LRR-repeat protein 13-like%2C transcript variant X2	gene415	0	1187
ort001563	XP_001649983.1	pyruvate kinase%2C transcript variant X1	gene3969	0	1043	XP_019530606.1	pyruvate kinase-like%2C transcript variant X3	gene34295	0	1043
ort001564	XP_001662710.2	probable phosphoserine aminotransferase	gene3967	0	704	XP_019530610.1	probable phosphoserine aminotransferase	gene34297	0	686
ort001565	XP_021693731.1	guanosine-3'%2C5'-bis(diphosphate) 3'-pyrophosphohydrolase MESH1%2C transcript variant X3	gene3968	2e-124	349	XP_019530611.1	guanosine-3'%2C5'-bis(diphosphate) 3'-pyrophosphohydrolase MESH1-like	gene34296	2e-124	349
ort001566	XP_021693762.1	ubiquitin carboxyl-terminal hydrolase 34	gene3993	0	7519	XP_019530612.1	ubiquitin carboxyl-terminal hydrolase 34-like	gene34266	0	7556
ort001567	XP_021693691.1	elongation of very long chain fatty acids protein AAEL008004%2C transcript variant X2	gene3938	0	738	XP_019530623.1	elongation of very long chain fatty acids protein AAEL008004%2C transcript variant X1	gene34332	0	738
ort001568	XP_001662536.1	glucosidase 2 subunit beta	gene3954	0	994	XP_019530625.1	glucosidase 2 subunit beta-like	gene34310	0	996
ort001569	XP_001662537.2	uncharacterized LOC5576200%2C transcript variant X3	gene3953	0	1064	XP_019530627.1	uncharacterized LOC109402409	gene34313	0	1063
ort001570	XP_001649986.2	uncharacterized LOC5565630	gene3972	2e-108	311	XP_019530629.1	uncharacterized LOC109402411	gene34291	1e-108	311
ort001571	XP_021693697.1	RNA-binding protein cabeza-like%2C transcript variant X5	gene3946	2e-129	378	XP_019530631.1	RNA-binding protein cabeza-like%2C transcript variant X1	gene34320	3e-126	370
ort001572	XP_021693699.1	RNA-binding protein cabeza-like%2C transcript variant X5	gene3946	7e-129	377	XP_019530632.1	RNA-binding protein cabeza-like%2C transcript variant X1	gene34320	1e-125	368
ort001573	XP_021693737.1	probable Rho GTPase-activating protein CG5521%2C transcript variant X1	gene3975	0	3930	XP_019530636.1	probable Rho GTPase-activating protein CG5521	gene34287	0	3944
ort001574	XP_001648724.2	uncharacterized LOC5564378%2C transcript variant X3	gene4002	0	906	XP_019530640.1	uncharacterized LOC109402420	gene34253	0	873
ort001575	XP_021693777.1	probable maleylacetoacetate isomerase 2%2C transcript variant X1	gene3996	2e-164	452	XP_019530644.1	probable maleylacetoacetate isomerase 2%2C transcript variant X1	gene34259	1e-164	452
ort001576	XP_001662723.2	titin homolog	gene3976	0	1169	XP_019530647.1	protein slender lobes-like	gene34282	0	1130
ort001577	XP_021693761.1	presenilin homolog%2C transcript variant X2	gene3990	0	842	XP_019530649.1	presenilin homolog%2C transcript variant X1	gene34269	0	874
ort001578	XP_021693759.1	proline-%2C glutamic acid- and leucine-rich protein 1	gene3989	0	1482	XP_019530650.1	proline-%2C glutamic acid- and leucine-rich protein 1-like	gene34270	0	1455
ort001579	XP_021693749.1	multiple coagulation factor deficiency protein 2%2C transcript variant X3	gene3987	2e-90	266	XP_019530657.1	multiple coagulation factor deficiency protein 2 homolog%2C transcript variant X5	gene34272	1e-97	285
ort001580	XP_021693757.1	multiple coagulation factor deficiency protein 2%2C transcript variant X3	gene3987	2e-96	280	XP_019530661.1	multiple coagulation factor deficiency protein 2 homolog%2C transcript variant X5	gene34272	5e-102	293
ort001581	XP_021693704.1	uncharacterized LOC5576198%2C transcript variant X1	gene3948	3e-100	309	XP_019530662.1	uncharacterized LOC109402432	gene34316	2e-98	304
ort001582	XP_001662725.1	aspartate aminotransferase%2C cytoplasmic	gene3978	0	830	XP_019530664.1	aspartate aminotransferase%2C cytoplasmic	gene34285	0	830
ort001583	XP_001662532.2	zinc finger protein 431	gene3959	0	886	XP_019530665.1	zinc finger protein 271-like	gene34304	0	872
ort001584	XP_001662538.1	uncharacterized LOC5576199	gene3952	0	563	XP_019530673.1	uncharacterized LOC109402442%2C transcript variant X1	gene34314	0	563
ort001585	XP_021709858.1	AP-1 complex subunit gamma-1%2C transcript variant X8	gene12107	0	872	XP_019530678.1	AP-1 complex subunit gamma-1-like%2C transcript variant X6	gene3926	0	823
ort001586	XP_021693742.1	scaffold protein salvador%2C transcript variant X1	gene3983	0	943	XP_019530680.1	scaffold protein salvador-like	gene34277	0	937
ort001587	XP_001662715.2	dimethyladenosine transferase 2%2C mitochondrial	gene3970	0	699	XP_019530681.1	dimethyladenosine transferase 2%2C mitochondrial-like	gene34294	0	743
ort001588	XP_001662088.2	uncharacterized LOC5575605	gene3999	1e-165	459	XP_019530689.1	uncharacterized LOC109402456	gene34261	1e-165	458
ort001589	XP_021693679.1	5-hydroxytryptamine receptor 1%2C transcript variant X4	gene3934	0	934	XP_019530693.1	5-hydroxytryptamine receptor 1-like	gene34336	0	934
ort001590	XP_021693744.1	uncharacterized LOC110674165	gene3985	7e-129	382	XP_019530694.1	uncharacterized LOC109402460	gene34275	6e-129	382
ort001591	XP_021693694.1	serine protease 7%2C transcript variant X2	gene3940	0	526	XP_019530696.1	serine protease 7-like	gene34329	0	520
ort001592	XP_021695380.1	3-phosphoinositide-dependent protein kinase 1	gene11040	0	610	XP_019530707.2	3-phosphoinositide-dependent protein kinase 1-like	gene28312	0	610
ort001593	XP_021703537.1	drosulfakinins	gene11038	3e-64	195	XP_019530717.2	callisulfakinin	gene28314	2e-69	208
ort001594	XP_001651397.2	chaoptin	gene11010	0	996	XP_019530720.1	toll-like receptor 7	gene34393	0	996
ort001595	XP_001657813.1	alpha%2Calpha-trehalose-phosphate synthase [UDP-forming]	gene11044	0	1682	XP_019530725.1	alpha%2Calpha-trehalose-phosphate synthase [UDP-forming]-like	gene34353	0	1682
ort001596	XP_021703531.1	bolA-like protein 2	gene11029	3e-57	171	XP_019530737.1	bolA-like protein 2	gene28323	2e-57	171
ort001597	XP_001652677.1	heat shock protein 67B2	gene9650	8e-85	247	XP_019530747.1	heat shock protein 67B2-like	gene34400	5e-85	247
ort001598	XP_001657826.1	serine/threonine-protein kinase 40%2C transcript variant X1	gene11027	0	1227	XP_019530748.1	serine/threonine-protein kinase 40-like	gene34371	0	1226
ort001599	XP_021703532.1	facilitated trehalose transporter Tret1%2C transcript variant X4	gene11034	0	1152	XP_019530751.2	uncharacterized LOC109402513	gene28315	0	1152
ort001600	XP_001657823.1	proteasome subunit beta type-6	gene11032	2e-169	466	XP_019530753.1	proteasome subunit beta type-6	gene28318	1e-169	466
ort001601	XP_021703554.1	dual specificity protein phosphatase 3%2C transcript variant X3	gene11045	1e-162	447	XP_019530757.1	dual specificity protein phosphatase 3-like%2C transcript variant X4	gene34351	8e-163	447
ort001602	XP_001650194.1	lactosylceramide 4-alpha-galactosyltransferase	gene11086	0	703	XP_019530760.1	lactosylceramide 4-alpha-galactosyltransferase	gene3933	0	703
ort001603	XP_001657811.1	polypeptide N-acetylgalactosaminyltransferase 3	gene11048	0	1338	XP_019530766.1	polypeptide N-acetylgalactosaminyltransferase 3-like	gene34349	0	1338
ort001604	XP_021703559.1	MDS1 and EVI1 complex locus protein EVI1	gene11049	0	647	XP_019530769.1	transcription factor hamlet-like	gene34346	0	665
ort001605	XP_021703558.1	serine protease 7%2C transcript variant X2	gene11050	0	557	XP_019530772.1	prostasin-like	gene34342	0	549
ort001606	XP_001651411.2	lysosomal alpha-mannosidase	gene10982	0	1296	XP_019530776.2	lysosomal alpha-mannosidase-like	gene28378	0	1297
ort001607	XP_021700029.1	neuronal acetylcholine receptor subunit alpha-7%2C transcript variant X4	gene7978	0	638	XP_019530777.1	neuronal acetylcholine receptor subunit alpha-7-like%2C transcript variant X2	gene28369	0	619
ort001608	XP_001650197.1	E3 ubiquitin-protein ligase siah-1	gene11088	2e-164	460	XP_019530783.1	E3 ubiquitin-protein ligase siah-1-like	gene3935	2e-164	460
ort001609	XP_021697254.1	uncharacterized LOC110675785	gene5795	0	534	XP_019530784.1	uncharacterized LOC109402568	gene34449	0	512
ort001610	XP_001654800.1	uncharacterized LOC5573777%2C transcript variant X1	gene5520	4e-114	322	XP_019530787.1	uncharacterized LOC109402571	gene34427	3e-114	322
ort001611	XP_001650202.1	pre-mRNA-processing factor 40 homolog A	gene11094	0	1219	XP_019530809.1	pre-mRNA-processing factor 40 homolog A	gene3938	0	1246
ort001612	XP_001662856.1	uncharacterized LOC5576769	gene5524	2e-20	95.1	XP_019530816.1	titin homolog	gene34431	2e-20	95.5
ort001613	XP_001656116.1	transmembrane protein 258 homolog%2C transcript variant X3	gene5531	1e-48	149	XP_019530819.1	transmembrane protein 258 homolog%2C transcript variant X1	gene34443	8e-49	149
ort001614	XP_001654799.1	staphylococcal nuclease domain-containing protein 1	gene5518	0	1873	XP_019530820.1	staphylococcal nuclease domain-containing protein 1-like	gene34426	0	1873
ort001615	XP_001650200.1	uncharacterized LOC5565853	gene11091	5e-112	333	XP_019530822.1	uncharacterized LOC109402583	gene3939	1e-105	316
ort001616	XP_021711951.1	NF-kappa-B essential modulator-like	gene18343	0	590	XP_019530823.1	NF-kappa-B essential modulator-like	gene34436	0	556
ort001617	XP_021696957.1	calcium-binding protein E63-1%2C transcript variant X23	gene5537	7e-174	481	XP_019530825.1	calcium-binding protein E63-1-like%2C transcript variant X7	gene34450	6e-174	481
ort001618	XP_021696965.1	calcium-binding protein E63-1%2C transcript variant X23	gene5537	3e-149	414	XP_019530827.1	calcium-binding protein E63-1-like%2C transcript variant X7	gene34450	2e-149	414
ort001619	XP_021696971.1	calcium-binding protein E63-1%2C transcript variant X23	gene5537	4e-131	365	XP_019530831.1	calcium-binding protein E63-1-like%2C transcript variant X7	gene34450	3e-131	365
ort001620	XP_001656118.2	muscle M-line assembly protein unc-89%2C transcript variant X2	gene5534	0	1758	XP_019530832.1	titin-like%2C transcript variant X2	gene34440	0	1809
ort001621	XP_001656113.1	partner of Y14 and mago	gene5528	1e-116	334	XP_019530834.1	partner of Y14 and mago	gene34438	5e-115	330
ort001622	XP_001650203.1	zinc finger protein 266%2C transcript variant X2	gene11095	0	577	XP_019530836.1	uncharacterized LOC109402589	gene3940	0	577
ort001623	XP_001649547.1	transmembrane protein 50A	gene5541	2e-115	324	XP_019530840.1	transmembrane protein 50A-like	gene34452	1e-115	324
ort001624	XP_001650201.1	serine--tRNA ligase%2C cytoplasmic	gene11093	0	1014	XP_019530846.1	serine--tRNA ligase%2C cytoplasmic-like	gene3941	0	1014
ort001625	XP_021713178.1	cation-independent mannose-6-phosphate receptor%2C transcript variant X2	gene622	0	1338	XP_019530848.1	cation-independent mannose-6-phosphate receptor	gene34493	0	1338
ort001626	XP_001650204.1	uncharacterized LOC5565844%2C transcript variant X2	gene11096	5e-97	316	XP_019530854.1	gastrula zinc finger protein xFG20-1%2C transcript variant X1	gene3942	7e-97	316
ort001627	XP_001654352.2	coiled-coil domain-containing protein 151	gene634	0	1212	XP_019530856.1	coiled-coil domain-containing protein 151-like	gene34498	0	1212
ort001628	XP_001658505.1	uncharacterized LOC5569413	gene624	3e-142	404	XP_019530858.1	uncharacterized LOC109402616	gene34486	3e-138	394
ort001629	XP_001660940.2	uncharacterized LOC5573618	gene623	4e-62	184	XP_019530863.1	uncharacterized LOC109402619	gene34485	2e-54	164
ort001630	XP_001648189.3	uncharacterized LOC5563873	gene602	0	712	XP_019530867.1	uncharacterized LOC109402624	gene34462	0	712
ort001631	XP_021693722.1	neurogenic locus Notch protein	gene633	0	5219	XP_019530876.1	neurogenic locus Notch protein-like	gene34497	0	5219
ort001632	XP_021695160.1	transmembrane protein 94%2C transcript variant X2	gene593	0	2482	XP_019530877.1	transmembrane protein 94-like%2C transcript variant X1	gene34457	0	2482
ort001633	XP_021694038.1	dihydropyrimidine dehydrogenase [NADP(+)]	gene636	0	2078	XP_019530880.1	dihydropyrimidine dehydrogenase [NADP(+)]-like	gene34500	0	2078
ort001634	XP_021695152.1	transmembrane channel-like protein 5	gene589	0	1635	XP_019530881.1	transmembrane channel-like protein 5	gene34455	0	1652
ort001635	XP_021693196.1	histone H2A.V	gene628	3e-86	247	XP_019530882.1	histone H2A.V	gene34494	2e-86	247
ort001636	XP_021695165.1	transient receptor potential cation channel protein painless%2C transcript variant X1	gene600	0	603	XP_019530885.1	transient receptor potential cation channel protein painless-like%2C transcript variant X2	gene34459	0	587
ort001637	XP_021693463.1	nucleosomal histone kinase 1%2C transcript variant X4	gene630	0	1142	XP_019530886.1	nucleosomal histone kinase 1-like	gene34495	0	1142
ort001638	XP_021695151.1	uncharacterized LOC110674877	gene587	4e-138	384	XP_019530892.1	uncharacterized LOC109402642	gene34453	3e-138	384
ort001639	XP_021693937.1	polycomb protein Pcl%2C transcript variant X2	gene635	0	1679	XP_019530893.1	polycomb protein Pcl-like	gene34499	0	1707
ort001640	XP_001660194.1	protein twisted gastrulation	gene597	0	520	XP_019530895.1	protein twisted gastrulation-like%2C transcript variant X1	gene34458	0	520
ort001641	XP_001660938.2	uncharacterized LOC5573611	gene620	0	531	XP_019530897.1	transmembrane protein 135-like	gene34482	0	531
ort001642	XP_001660939.2	uncharacterized protein C6orf203	gene621	3e-113	323	XP_019530899.1	uncharacterized protein C6orf203 homolog	gene34483	1e-112	321
ort001643	XP_021695301.1	uncharacterized LOC5579011	gene650	0	1212	XP_019530906.1	myosin-G heavy chain-like	gene34519	0	1174
ort001644	XP_021694209.1	glutaredoxin domain-containing cysteine-rich protein CG31559	gene656	1e-116	328	XP_019530908.1	glutaredoxin domain-containing cysteine-rich protein CG31559-like	gene34527	1e-116	328
ort001645	XP_021696027.1	uncharacterized LOC5579004%2C transcript variant X2	gene657	0	1496	XP_019530922.1	uncharacterized LOC109402678%2C transcript variant X2	gene34528	0	1464
ort001646	XP_001653819.1	uncharacterized LOC5572060	gene11051	1e-174	482	XP_019530927.1	uncharacterized LOC109402679	gene3906	9e-175	482
ort001647	XP_021696427.1	exportin-6-A%2C transcript variant X1	gene665	0	2120	XP_019530928.1	exportin-6-A%2C transcript variant X1	gene34534	0	2120
ort001648	XP_021696109.1	uncharacterized LOC5566240	gene659	0	697	XP_019530933.1	uncharacterized LOC109402683	gene34530	0	697
ort001649	XP_001664196.2	zinc carboxypeptidase%2C transcript variant X2	gene644	0	537	XP_019530940.1	zinc carboxypeptidase-like	gene34509	0	537
ort001650	XP_001664192.2	ER membrane protein complex subunit 8/9 homolog	gene649	8e-145	401	XP_019530941.1	ER membrane protein complex subunit 8/9 homolog	gene34518	6e-145	401
ort001651	XP_021698054.1	N-alpha-acetyltransferase 35%2C NatC auxiliary subunit%2C transcript variant X1	gene6442	0	1422	XP_019530944.1	N-alpha-acetyltransferase 35%2C NatC auxiliary subunit%2C transcript variant X1	gene34541	0	1422
ort001652	XP_021697940.1	kinesin-like protein KIN-7O%2C transcript variant X1	gene6383	0	3633	XP_019530950.1	kinesin-like protein KIN-7O	gene34573	0	3626
ort001653	XP_001653508.2	extensin-1	gene6391	1e-140	398	XP_019530955.1	mucin-2-like	gene34559	2e-131	374
ort001654	XP_021697952.1	uncharacterized LOC110676010	gene6394	0	990	XP_019530956.1	uncharacterized LOC109402712	gene34557	0	1011
ort001655	XP_021697929.1	inositol 1%2C4%2C5-trisphosphate receptor%2C transcript variant X4	gene6374	0	5865	XP_019530961.1	inositol 1%2C4%2C5-trisphosphate receptor	gene34577	0	5865
ort001656	XP_021697972.1	putative homeodomain transcription factor	gene6403	0	1548	XP_019530962.1	putative homeodomain transcription factor%2C transcript variant X3	gene34547	0	1566
ort001657	XP_021697944.1	cytochrome c oxidase subunit 6B1	gene6387	8e-60	177	XP_019530981.1	cytochrome c oxidase subunit 6B1-like	gene34567	6e-60	177
ort001658	XP_021697939.1	FAS-associated factor 1%2C transcript variant X1	gene6381	0	1456	XP_019530988.1	FAS-associated factor 1%2C transcript variant X3	gene34575	0	1456
ort001659	XP_021697958.1	basic proline-rich protein	gene6398	0	1250	XP_019530993.1	nascent polypeptide-associated complex subunit alpha%2C muscle-specific form%2C transcript variant X1	gene34553	0	1308
ort001660	XP_021697956.1	leucine-rich repeat extensin-like protein 5%2C transcript variant X2	gene6397	0	711	XP_019530994.1	mucin-2-like	gene34554	0	651
ort001661	XP_021707100.1	mitochondrial import inner membrane translocase subunit Tim23-like%2C transcript variant X1	gene17130	5e-126	357	XP_019531017.1	mitochondrial import inner membrane translocase subunit Tim23-like	gene373	4e-126	357
ort001662	XP_021707998.1	SH2B adapter protein 2%2C transcript variant X5	gene13881	0	985	XP_019531021.1	SH2B adapter protein 2-like%2C transcript variant X2	gene34606	0	999
ort001663	XP_021707996.1	SH2B adapter protein 2%2C transcript variant X5	gene13881	0	984	XP_019531023.1	SH2B adapter protein 2-like%2C transcript variant X2	gene34606	0	999
ort001664	XP_021708001.1	uncharacterized LOC110678833%2C transcript variant X1	gene13883	3e-71	214	XP_019531024.1	uncharacterized LOC109402772	gene34608	5e-77	228
ort001665	XP_021707418.1	uncharacterized LOC110678614	gene13889	8e-78	225	XP_019531028.1	uncharacterized LOC109402777	gene34611	6e-78	225
ort001666	XP_021705984.1	WD repeat-containing and planar cell polarity effector protein fritz	gene13918	0	2025	XP_019531032.1	WD repeat-containing and planar cell polarity effector protein fritz%2C transcript variant X3	gene34652	0	2008
ort001667	XP_021705988.1	ribonuclease P protein subunit p21	gene13917	6e-97	278	XP_019531039.1	ribonuclease P protein subunit p21-like	gene34651	6e-88	255
ort001668	XP_021709572.1	26S proteasome regulatory subunit 6B	gene14587	0	838	XP_019531040.1	26S protease regulatory subunit 6B	gene3949	0	838
ort001669	XP_021708606.1	diamine acetyltransferase 2	gene13936	3e-66	200	XP_019531053.1	diamine acetyltransferase 2-like	gene34668	3e-66	200
ort001670	XP_021710256.1	histone-lysine N-methyltransferase SETD1	gene13929	0	2052	XP_019531062.1	histone-lysine N-methyltransferase SETD1	gene34659	0	2053
ort001671	XP_001654005.2	EF-hand domain-containing family member C2	gene13906	0	1546	XP_019531072.1	EF-hand domain-containing family member C2-like	gene34634	0	1546
ort001672	XP_001654921.2	rabankyrin-5	gene13924	0	2002	XP_019531082.1	rabankyrin-5-like%2C transcript variant X2	gene34656	0	2006
ort001673	XP_021709542.1	uncharacterized LOC5573887%2C transcript variant X3	gene13926	4e-117	328	XP_019531083.1	uncharacterized LOC109402813%2C transcript variant X5	gene34657	3e-117	328
ort001674	XP_001654920.1	uncharacterized LOC5573887%2C transcript variant X3	gene13926	4e-117	328	XP_019531084.1	uncharacterized LOC109402813%2C transcript variant X5	gene34657	3e-117	328
ort001675	XP_001657348.1	putative tricarboxylate transport protein%2C mitochondrial%2C transcript variant X2	gene13893	0	644	XP_019531092.1	putative tricarboxylate transport protein%2C mitochondrial%2C transcript variant X1	gene34620	0	644
ort001676	XP_021705035.1	tetraspanin-33	gene13891	0	571	XP_019531093.1	tetraspanin-33	gene34617	0	571
ort001677	XP_001657349.1	probable fatty acid-binding protein	gene13895	2e-91	261	XP_019531094.1	probable fatty acid-binding protein	gene34621	2e-91	261
ort001678	XP_001654366.1	facilitated trehalose transporter Tret1	gene13945	0	1125	XP_019531101.1	facilitated trehalose transporter Tret1-like%2C transcript variant X3	gene34676	0	1125
ort001679	XP_001654364.1	mediator of RNA polymerase II transcription subunit 29%2C transcript variant X1	gene13946	2e-103	298	XP_019531105.1	mediator of RNA polymerase II transcription subunit 29-like%2C transcript variant X2	gene34677	7e-93	271
ort001680	XP_021706924.1	pinin-like	gene13912	0	897	XP_019531106.1	probable serine/threonine-protein kinase kinX	gene34647	0	919
ort001681	XP_021706925.1	RNA-binding protein 7-like	gene13913	7e-121	343	XP_019531107.1	RNA-binding protein 7-like	gene34648	2e-124	352
ort001682	XP_001648498.2	cryptochrome-1	gene13863	0	1076	XP_019531110.1	cryptochrome-1-like	gene34592	0	1076
ort001683	XP_021706881.1	protein claret segregational	gene13931	0	1299	XP_019531114.1	protein claret segregational-like	gene34663	0	1285
ort001684	XP_011493562.2	uncharacterized LOC23687458	gene13932	5e-75	222	XP_019531115.1	uncharacterized LOC109402836	gene34664	3e-75	222
ort001685	XP_021709490.1	TBC1 domain family member 10A%2C transcript variant X1	gene13873	0	753	XP_019531116.1	TBC1 domain family member 10A	gene34598	0	753
ort001686	XP_021707949.1	GATA-binding factor A%2C transcript variant X1	gene13943	0	685	XP_019531119.1	GATA-binding factor A-like%2C transcript variant X3	gene34672	0	719
ort001687	XP_001648518.2	mediator of RNA polymerase II transcription subunit 31%2C transcript variant X1	gene13890	3e-159	439	XP_019531126.1	mediator of RNA polymerase II transcription subunit 31%2C transcript variant X2	gene34615	2e-159	439
ort001688	XP_011493225.2	mediator of RNA polymerase II transcription subunit 31%2C transcript variant X1	gene13890	8e-155	428	XP_019531128.1	mediator of RNA polymerase II transcription subunit 31%2C transcript variant X2	gene34615	6e-155	428
ort001689	XP_011493560.1	uncharacterized LOC5573878%2C transcript variant X3	gene13935	7e-94	270	XP_019531130.1	uncharacterized LOC109402848	gene34667	2e-84	245
ort001690	XP_021706575.1	transcription factor collier	gene17131	0	1273	XP_019531131.1	transcription factor collier	gene374	0	1273
ort001691	XP_021706073.1	transcriptional activator/repressor MOT3	gene12307	0	971	XP_019531132.1	transcriptional activator/repressor MOT3-like	gene3958	0	1057
ort001692	XP_021711910.1	short-chain specific acyl-CoA dehydrogenase%2C mitochondrial-like	gene18297	0	668	XP_019531139.1	short-chain specific acyl-CoA dehydrogenase%2C mitochondrial-like	gene34599	0	668
ort001693	XP_011493509.1	larval/pupal cuticle protein H1C	gene13900	3e-29	104	XP_019531141.1	A-kinase anchor protein 14-like	gene34627	3e-40	132
ort001694	XP_001653066.1	charged multivesicular body protein 2a	gene12306	4e-168	463	XP_019531143.1	charged multivesicular body protein 2a-like	gene3961	3e-168	463
ort001695	XP_001657236.2	uncharacterized LOC5579043	gene15082	0	655	XP_019531151.1	uncharacterized LOC109402878	gene34689	0	655
ort001696	XP_011493105.1	glutaredoxin-C4%2C transcript variant X3	gene15086	2e-74	216	XP_019531154.1	glutaredoxin-C4	gene34694	2e-74	216
ort001697	XP_001657248.1	probable ATP-dependent RNA helicase DDX46	gene15091	0	2073	XP_019531156.1	probable ATP-dependent RNA helicase DDX46%2C transcript variant X1	gene34700	0	2073
ort001698	XP_021710780.1	reversion-inducing cysteine-rich protein with Kazal motifs%2C transcript variant X3	gene15097	0	1831	XP_019531159.1	reversion-inducing cysteine-rich protein with Kazal motifs-like%2C transcript variant X3	gene34705	0	1831
ort001699	XP_021710784.1	uncharacterized LOC5567939	gene15098	0	530	XP_019531162.1	uncharacterized LOC109402886	gene34706	0	531
ort001700	XP_001657241.1	group XIIB secretory phospholipase A2-like protein%2C transcript variant X2	gene15087	1e-174	480	XP_019531172.1	group XIIB secretory phospholipase A2-like protein%2C transcript variant X3	gene34696	8e-175	480
ort001701	XP_001657235.1	protein transport protein Sec61 subunit beta	gene15081	2e-66	195	XP_019531174.1	protein transport protein Sec61 subunit beta	gene34688	1e-66	195
ort001702	XP_021705464.1	uncharacterized LOC110677897	gene12303	0	6877	XP_019531179.1	FERM%2C RhoGEF and pleckstrin domain-containing protein 2-like%2C transcript variant X4	gene3967	0	6826
ort001703	XP_001657756.2	39S ribosomal protein L39%2C mitochondrial	gene15101	0	638	XP_019531183.1	39S ribosomal protein L39%2C mitochondrial-like	gene34713	0	638
ort001704	XP_001657234.2	uncharacterized LOC5579042	gene15080	0	666	XP_019531189.1	uncharacterized LOC109402903	gene34685	0	690
ort001705	XP_021705466.1	FERM%2C RhoGEF and pleckstrin domain-containing protein 2%2C transcript variant X3	gene12301	0	763	XP_019531194.1	FERM%2C RhoGEF and pleckstrin domain-containing protein 2-like%2C transcript variant X4	gene3967	0	768
ort001706	XP_001662880.2	serine protease Hayan	gene4058	0	516	XP_019531205.1	serine protease Hayan-like	gene34754	0	516
ort001707	XP_001656653.3	titin	gene4069	0	879	XP_019531209.1	titin-like	gene34778	0	1479
ort001708	XP_001653062.1	seminal metalloprotease 1	gene12302	0	544	XP_019531210.1	zinc metalloproteinase nas-13-like	gene3970	0	544
ort001709	XP_021694425.1	coiled-coil domain-containing protein 103	gene4068	3e-48	148	XP_019531211.1	coiled-coil domain-containing protein 103-like	gene34777	2e-48	148
ort001710	XP_021693817.1	aminopeptidase N	gene4056	0	1592	XP_019531222.1	aminopeptidase N-like	gene34751	0	1592
ort001711	XP_001656657.2	melanization protease 1%2C transcript variant X2	gene4065	1e-143	409	XP_019531224.1	serine protease easter-like	gene34770	1e-143	409
ort001712	XP_001656656.2	melanization protease 1	gene4066	4e-150	424	XP_019531226.1	melanization protease 1-like	gene34771	3e-150	424
ort001713	XP_001656652.2	ubiquitin-like domain-containing CTD phosphatase 1	gene4070	0	656	XP_019531230.1	ubiquitin-like domain-containing CTD phosphatase 1	gene34779	0	656
ort001714	XP_001656806.1	uncharacterized LOC5578108%2C transcript variant X2	gene17142	2e-116	363	XP_019531232.1	uncharacterized LOC109402911	gene387	1e-107	339
ort001715	XP_021693822.1	serine protease easter%2C transcript variant X2	gene4062	0	558	XP_019531233.1	serine protease easter-like	gene34763	0	558
ort001716	XP_021693821.1	ADP-ribosylation factor-like protein 2	gene4061	4e-135	375	XP_019531234.1	ADP-ribosylation factor-like protein 2	gene34762	3e-135	375
ort001717	XP_021693813.1	uncharacterized LOC5569692%2C transcript variant X2	gene4047	0	649	XP_019531235.1	uncharacterized LOC109402950%2C transcript variant X2	gene34744	0	649
ort001718	XP_011492946.2	uncharacterized LOC5569692%2C transcript variant X2	gene4047	0	577	XP_019531236.1	uncharacterized LOC109402950%2C transcript variant X2	gene34744	0	578
ort001719	XP_001656662.2	probable palmitoyltransferase ZDHHC16	gene4060	0	775	XP_019531240.1	probable palmitoyltransferase ZDHHC16	gene34757	0	775
ort001720	XP_021704728.1	replication factor C subunit 1	gene12300	0	1664	XP_019531241.1	replication factor C subunit 1-like	gene3971	0	1667
ort001721	XP_021700011.1	integrator complex subunit 3 homolog	gene7966	0	570	XP_019531246.1	integrator complex subunit 3 homolog	gene34803	0	570
ort001722	XP_001653059.1	serine/arginine repetitive matrix protein 2	gene12292	0	931	XP_019531253.1	uncharacterized protein DDB_G0284459-like	gene3976	0	949
ort001723	XP_021711610.1	coiled-coil domain-containing protein 39	gene12290	0	1884	XP_019531257.1	coiled-coil domain-containing protein 39-like	gene3977	0	1884
ort001724	XP_021698991.1	protein disabled%2C transcript variant X5	gene7185	0	3806	XP_019531278.1	protein disabled-like%2C transcript variant X2	gene34924	0	3726
ort001725	XP_021699002.1	trafficking protein particle complex subunit 2-like protein%2C transcript variant X3	gene7186	0	647	XP_019531279.1	trafficking protein particle complex subunit 2-like protein%2C transcript variant X3	gene34922	0	647
ort001726	XP_001654507.1	charged multivesicular body protein 6%2C transcript variant X2	gene7240	4e-135	378	XP_019531288.1	charged multivesicular body protein 6-like%2C transcript variant X1	gene34859	3e-135	378
ort001727	XP_001663347.2	cactin	gene7200	0	1089	XP_019531299.1	cactin-like	gene34904	0	1089
ort001728	XP_001654511.2	xanthine dehydrogenase/oxidase	gene7245	0	1850	XP_019531302.1	xanthine dehydrogenase 1-like%2C transcript variant X2	gene34852	0	1796
ort001729	XP_001661478.2	polycomb group protein Psc	gene7210	0	2145	XP_019531305.1	polycomb group protein Psc-like	gene34888	0	2174
ort001730	XP_001661518.1	UDP-glucose 6-dehydrogenase	gene7188	0	984	XP_019531316.1	UDP-glucose 6-dehydrogenase	gene34919	0	984
ort001731	XP_021709454.1	uncharacterized LOC110679351%2C transcript variant X1	gene17145	2e-165	522	XP_019531317.1	uncharacterized LOC109403024	gene388	2e-158	504
ort001732	XP_001653055.1	geranylgeranyl transferase type-2 subunit beta	gene12284	0	666	XP_019531327.1	geranylgeranyl transferase type-2 subunit beta-like%2C transcript variant X2	gene3982	0	666
ort001733	XP_021699047.1	Usher syndrome type-1G protein homolog%2C transcript variant X6	gene7232	0	959	XP_019531332.1	Usher syndrome type-1G protein homolog%2C transcript variant X3	gene34868	0	959
ort001734	XP_021699014.1	LIM/homeobox protein Awh%2C transcript variant X2	gene7192	0	520	XP_019531341.1	LIM/homeobox protein Awh-like	gene34911	0	520
ort001735	XP_021699024.1	uncharacterized LOC5572108%2C transcript variant X4	gene7204	0.2	29.3	XP_019531347.1	interaptin-like%2C transcript variant X6	gene34897	0.18	29.3
ort001736	XP_021699025.1	tyrosine-protein kinase Dnt	gene7207	0	1297	XP_019531350.1	tyrosine-protein kinase Dnt	gene34889	0	1297
ort001737	XP_001653052.1	Bardet-Biedl syndrome 5 protein homolog	gene12281	0	691	XP_019531351.1	Bardet-Biedl syndrome 5 protein homolog	gene3985	0	691
ort001738	XP_021699051.1	protein SHQ1 homolog	gene7237	0	614	XP_019531358.1	protein SHQ1 homolog	gene34862	0	621
ort001739	XP_001654490.2	HMG box-containing protein 4	gene7222	0	607	XP_019531359.1	HMG box-containing protein 4	gene34878	0	577
ort001740	XP_001653051.1	mannose-1-phosphate guanyltransferase beta	gene12279	0	725	XP_019531360.1	mannose-1-phosphate guanyltransferase beta	gene3986	0	725
ort001741	XP_001663970.2	intraflagellar transport protein 122 homolog	gene7191	0	2407	XP_019531362.1	intraflagellar transport protein 122 homolog%2C transcript variant X1	gene34912	0	2407
ort001742	XP_021699004.1	SURF1-like protein	gene7189	0	555	XP_019531363.1	SURF1-like protein	gene34917	0	555
ort001743	XP_001650469.2	membrane-bound alkaline phosphatase	gene7214	0	1008	XP_019531367.1	membrane-bound alkaline phosphatase-like	gene34885	0	979
ort001744	XP_001654514.2	UDP-glucuronosyltransferase 2A3	gene7248	0	785	XP_019531368.1	UDP-glucuronosyltransferase 2C1-like	gene34866	0	785
ort001745	XP_001661471.2	uncharacterized LOC5574456	gene7218	0	904	XP_019531369.1	uncharacterized LOC109403084	gene34882	0	904
ort001746	XP_021706113.1	uncharacterized LOC5570060%2C transcript variant X2	gene12278	0	565	XP_019531371.1	uncharacterized LOC109403083	gene3987	0	562
ort001747	XP_001650153.1	adult-specific cuticular protein ACP-20	gene7139	2e-137	386	XP_019531378.1	pro-resilin-like	gene34967	5e-147	410
ort001748	XP_021698962.1	cuticle protein 8%2C transcript variant X5	gene7138	6e-96	272	XP_019531379.1	cuticle protein 8-like%2C transcript variant X1	gene34968	4e-96	272
ort001749	XP_021705981.1	RNA polymerase II-associated factor 1 homolog	gene12277	0	773	XP_019531380.1	RNA polymerase II-associated factor 1 homolog	gene3988	0	772
ort001750	XP_001650182.1	cuticle protein 19	gene7162	7e-70	207	XP_019531383.1	cuticle protein 19-like	gene34946	1e-69	206
ort001751	XP_001659657.1	cuticle protein 19	gene7164	4e-85	246	XP_019531386.1	cuticle protein 19-like	gene34944	1e-77	227
ort001752	XP_001659658.1	adult-specific cuticular protein ACP-20	gene7168	3e-123	346	XP_019531389.1	adult-specific cuticular protein ACP-20-like	gene34943	1e-116	329
ort001753	XP_001659644.2	cuticle protein 19	gene7151	1e-68	202	XP_019531391.1	cuticle protein 19-like	gene34959	1e-68	202
ort001754	XP_001659645.1	cuticle protein 7	gene7152	2e-82	238	XP_019531395.1	cuticle protein 7-like	gene34958	3e-82	238
ort001755	XP_001659642.1	cuticle protein 19	gene7150	2e-61	183	XP_019531397.1	cuticle protein 19-like	gene34963	1e-61	183
ort001756	XP_021698973.1	uncharacterized LOC5577266	gene7176	4e-174	479	XP_019531405.1	uncharacterized LOC109403123%2C transcript variant X1	gene34936	3e-174	479
ort001757	XP_021698995.1	LIM and SH3 domain protein Lasp%2C transcript variant X8	gene7183	0	699	XP_019531414.1	LIM and SH3 domain protein Lasp-like	gene34926	0	674
ort001758	XP_001661524.2	keratin-associated protein 9-1	gene7184	7e-146	409	XP_019531415.1	keratin-associated protein 9-1	gene34927	6e-146	409
ort001759	XP_021695230.1	cuticle protein 19	gene7156	1e-75	225	XP_019531424.1	cuticle protein 19-like	gene34954	1e-75	225
ort001760	XP_021708250.1	transmembrane and TPR repeat-containing protein CG4050%2C transcript variant X1	gene17555	0	1080	XP_019531429.1	transmembrane and TPR repeat-containing protein CG4050-like	gene34970	0	1083
ort001761	XP_021708030.1	myoneurin	gene17527	0	573	XP_019531435.1	zinc finger protein 84-like	gene34995	0	570
ort001762	XP_021706587.1	uncharacterized LOC110678272	gene17512	0	846	XP_019531436.1	uncharacterized LOC109403149	gene35007	0	843
ort001763	XP_001661222.1	mantle protein	gene17532	3e-89	259	XP_019531442.1	mantle protein-like	gene34987	4e-89	258
ort001764	XP_021708321.1	probable insulin-like peptide 2%2C transcript variant X2	gene17552	9e-104	295	XP_019531443.1	uncharacterized LOC109403158	gene34973	2e-104	296
ort001765	XP_001657487.1	probable insulin-like peptide 2%2C transcript variant X2	gene17552	1e-90	263	XP_019531444.1	LIRP-like	gene34974	2e-92	266
ort001766	XP_021709576.1	uncharacterized LOC110679401	gene17551	2e-90	261	XP_019531445.1	uncharacterized LOC109403160	gene34975	1e-90	261
ort001767	XP_021708144.1	macoilin-2%2C transcript variant X2	gene17544	0	875	XP_019531448.1	macoilin-like%2C transcript variant X6	gene34982	0	1567
ort001768	XP_011493076.1	integumentary mucin C.1%2C transcript variant X1	gene18110	3e-42	140	XP_019531461.1	integumentary mucin C.1	gene35001	7e-41	136
ort001769	XP_001653045.2	uncharacterized LOC5570064	gene12274	0	749	XP_019531464.1	uncharacterized LOC109403169	gene3989	0	738
ort001770	XP_021707979.1	copper transporter 5.1%2C transcript variant X3	gene17514	6e-129	361	XP_019531469.1	copper transporter 5.1-like%2C transcript variant X4	gene35005	3e-140	389
ort001771	XP_001657496.1	NHL repeat-containing protein 2%2C transcript variant X3	gene17545	0	1565	XP_019531472.1	NHL repeat-containing protein 2	gene34981	0	1568
ort001772	XP_001657497.1	DPH4 homolog	gene17546	3e-87	252	XP_019531474.1	dnaJ homolog subfamily C member 24-like%2C transcript variant X2	gene34980	2e-87	252
ort001773	XP_001661237.1	delta-aminolevulinic acid dehydratase	gene17515	0	654	XP_019531478.2	delta-aminolevulinic acid dehydratase	gene629	0	654
ort001774	XP_001657494.2	clathrin light chain%2C transcript variant X2	gene17547	5e-143	401	XP_019531479.1	clathrin light chain%2C transcript variant X2	gene34979	4e-143	401
ort001775	XP_001657495.2	clathrin light chain%2C transcript variant X2	gene17547	3e-140	394	XP_019531480.1	clathrin light chain%2C transcript variant X2	gene34979	2e-140	394
ort001776	XP_021708157.1	clathrin light chain%2C transcript variant X2	gene17547	5e-134	377	XP_019531481.1	clathrin light chain%2C transcript variant X2	gene34979	4e-134	377
ort001777	XP_001657492.2	clathrin light chain%2C transcript variant X2	gene17547	2e-135	377	XP_019531482.1	clathrin light chain%2C transcript variant X2	gene34979	1e-135	377
ort001778	XP_001661224.1	adult enhancer factor 1%2C transcript variant X1	gene17530	0	652	XP_019531487.2	adult enhancer factor 1-like%2C transcript variant X4	gene611	0	657
ort001779	XP_001661078.1	zinc finger protein 708	gene6406	0	1285	XP_019531503.1	zinc finger protein 708	gene35039	0	1314
ort001780	XP_001661077.1	uncharacterized LOC5573992	gene6405	0	754	XP_019531505.1	uncharacterized LOC109403205	gene35040	0	754
ort001781	XP_021697974.1	protein tramtrack%2C beta isoform%2C transcript variant X5	gene6404	0	1079	XP_019531509.1	ras-interacting protein RIP3%2C transcript variant X1	gene35042	0	1102
ort001782	XP_021698016.1	chaoptin	gene6423	0	1455	XP_019531510.1	insulin-like growth factor-binding protein complex acid labile subunit%2C transcript variant X3	gene35025	0	1455
ort001783	XP_021698039.1	protein alan shepard%2C transcript variant X15	gene6429	0	867	XP_019531517.1	protein alan shepard%2C transcript variant X7	gene35015	0	867
ort001784	XP_021698038.1	protein alan shepard%2C transcript variant X15	gene6429	0	911	XP_019531521.1	protein alan shepard%2C transcript variant X7	gene35015	0	911
ort001785	XP_021697960.1	uncharacterized LOC5573987%2C transcript variant X12	gene6402	0	1933	XP_019531540.1	uncharacterized LOC109403225%2C transcript variant X6	gene35047	0	1933
ort001786	XP_021698005.1	mitogen-activated protein kinase kinase kinase 11%2C transcript variant X3	gene6412	0	1871	XP_019531551.1	mitogen-activated protein kinase kinase kinase 13	gene35035	0	1865
ort001787	XP_001653516.2	kynurenine 3-monooxygenase	gene6401	0	931	XP_019531555.1	kynurenine 3-monooxygenase	gene35048	0	931
ort001788	XP_001653515.1	2-acylglycerol O-acyltransferase 2%2C transcript variant X1	gene6399	0	577	XP_019531558.1	2-acylglycerol O-acyltransferase 2-A-like%2C transcript variant X4	gene35049	0	577
ort001789	XP_001658110.2	FGGY carbohydrate kinase domain-containing protein	gene6418	0	1025	XP_019531561.1	FGGY carbohydrate kinase domain-containing protein-like	gene35030	0	1025
ort001790	XP_001661088.1	mitochondrial ubiquitin ligase activator of nfkb 1-A%2C transcript variant X1	gene6417	0	682	XP_019531563.1	mitochondrial ubiquitin ligase activator of nfkb 1-A	gene35031	0	682
ort001791	XP_001661090.1	uncharacterized LOC5574003%2C transcript variant X2	gene6419	1e-102	290	XP_019531564.1	uncharacterized LOC109403237%2C transcript variant X2	gene35029	8e-103	290
ort001792	XP_021698012.1	uncharacterized LOC5574003%2C transcript variant X2	gene6419	4e-93	265	XP_019531565.1	uncharacterized LOC109403237%2C transcript variant X2	gene35029	3e-93	265
ort001793	XP_001661087.1	ubiquitin-conjugating enzyme E2 J2	gene6416	1e-171	473	XP_019531572.1	ubiquitin-conjugating enzyme E2 J2-like	gene35032	0	501
ort001794	XP_021695330.1	DNA polymerase alpha subunit B	gene10083	0	597	XP_019531575.1	DNA polymerase alpha subunit B%2C transcript variant X4	gene35056	0	597
ort001795	XP_021713040.1	DNA polymerase alpha subunit B	gene2953	0	905	XP_019531576.1	DNA polymerase alpha subunit B%2C transcript variant X4	gene35056	0	905
ort001796	XP_021695253.1	DNA polymerase alpha subunit B	gene8273	0	998	XP_019531578.1	DNA polymerase alpha subunit B%2C transcript variant X4	gene35056	0	973
ort001797	XP_021707799.1	uncharacterized LOC5563961	gene14061	1e-158	440	XP_019531584.1	uncharacterized LOC109403257	gene35120	6e-168	464
ort001798	XP_001648297.2	glucose dehydrogenase [FAD%2C quinone]	gene14086	0	1219	XP_019531587.1	glucose dehydrogenase [FAD%2C quinone]-like	gene35099	0	1212
ort001799	XP_001648305.2	glucose dehydrogenase [FAD%2C quinone]	gene14098	0	626	XP_019531597.1	glucose dehydrogenase [FAD%2C quinone]-like	gene35087	0	626
ort001800	XP_021705859.1	N-acetyltransferase eco	gene15216	0	1392	XP_019531607.1	N-acetyltransferase eco	gene4004	0	1379
ort001801	XP_021710655.1	glucose dehydrogenase [FAD%2C quinone]-like	gene14089	0	769	XP_019531611.1	glucose dehydrogenase [FAD%2C quinone]-like	gene35096	0	769
ort001802	XP_021710660.1	flotillin-2%2C transcript variant X2	gene14084	0	784	XP_019531613.1	flotillin-2%2C transcript variant X7	gene35085	0	784
ort001803	XP_021710658.1	flotillin-2%2C transcript variant X2	gene14084	0	563	XP_019531615.1	flotillin-2%2C transcript variant X7	gene35085	0	563
ort001804	XP_021708836.1	RIMS-binding protein 2%2C transcript variant X8	gene14115	0	3075	XP_019531624.1	RIMS-binding protein 2-like%2C transcript variant X4	gene35071	0	3075
ort001805	XP_021704755.1	protein unc-45 homolog B%2C transcript variant X1	gene14127	0	1914	XP_019531630.1	protein unc-45 homolog B-like%2C transcript variant X2	gene35063	0	1914
ort001806	XP_021706761.1	cysteine sulfinic acid decarboxylase	gene14113	0	917	XP_019531631.1	acidic amino acid decarboxylase GADL1	gene35073	0	917
ort001807	XP_021711933.1	IQ and AAA domain-containing protein 1-like	gene18333	0	863	XP_019531634.1	IQ and AAA domain-containing protein 1-like	gene4005	0	860
ort001808	XP_021707324.1	alpha-tocopherol transfer protein-like%2C transcript variant X3	gene14121	0	578	XP_019531635.1	alpha-tocopherol transfer protein-like%2C transcript variant X2	gene35068	0	578
ort001809	XP_001661208.1	vacuolar protein sorting-associated protein 37B	gene14124	1e-126	357	XP_019531639.1	vacuolar protein sorting-associated protein 37B-like	gene35067	2e-117	334
ort001810	XP_001648287.1	probable 28S ribosomal protein S6%2C mitochondrial	gene14079	1e-108	306	XP_019531641.1	probable 28S ribosomal protein S6%2C mitochondrial	gene35104	8e-109	306
ort001811	XP_021705501.1	uncharacterized LOC5574131	gene14106	3e-66	195	XP_019531645.1	uncharacterized LOC109403297	gene35078	2e-66	195
ort001812	XP_001648276.2	uncharacterized LOC5563949	gene14066	2e-142	399	XP_019531647.1	uncharacterized LOC109403300	gene35115	1e-142	399
ort001813	XP_021707419.1	zinc finger protein 271	gene17448	0	1249	XP_019531650.1	zinc finger protein 271-like%2C transcript variant X1	gene4007	0	1265
ort001814	XP_001648275.2	uncharacterized LOC5563950	gene14065	0	511	XP_019531651.1	uncharacterized LOC109403303	gene35116	0	511
ort001815	XP_021706424.1	uncharacterized LOC110678128	gene14058	2e-65	210	XP_019531652.1	histidine-rich glycoprotein	gene35125	5e-69	220
ort001816	XP_021708567.1	cytochrome P450 4c21	gene14059	0	937	XP_019531653.1	cytochrome P450 4c21-like	gene35124	0	937
ort001817	XP_021708568.1	zwei Ig domain protein zig-8-like%2C transcript variant X4	gene14055	0	830	XP_019531654.1	zwei Ig domain protein zig-8-like%2C transcript variant X2	gene35123	0	826
ort001818	XP_021708267.1	importin-11-like	gene14076	0	605	XP_019531658.1	importin-11-like%2C transcript variant X2	gene35108	0	605
ort001819	XP_001661200.1	kinesin-like protein KIF3A%2C transcript variant X2	gene14109	0	1368	XP_019531659.1	kinesin-like protein KIF3A	gene35075	0	1368
ort001820	XP_021709848.1	uncharacterized LOC5574129%2C transcript variant X1	gene14110	5e-133	372	XP_019531660.1	uncharacterized LOC109403311%2C transcript variant X3	gene35076	3e-133	372
ort001821	XP_001663319.1	Na(+)/H(+) exchange regulatory cofactor NHE-RF1	gene17445	8e-167	464	XP_019531661.1	Na(+)/H(+) exchange regulatory cofactor NHE-RF2	gene4008	6e-167	464
ort001822	XP_001648293.2	eukaryotic translation initiation factor 4H%2C transcript variant X4	gene14082	0	535	XP_019531664.1	eukaryotic translation initiation factor 4H-like%2C transcript variant X1	gene35102	0	519
ort001823	XP_001648292.2	eukaryotic translation initiation factor 4H%2C transcript variant X4	gene14082	0	504	XP_019531665.1	eukaryotic translation initiation factor 4H-like%2C transcript variant X1	gene35102	1e-175	488
ort001824	XP_001648308.1	serine/threonine-protein phosphatase 4 catalytic subunit	gene14102	0	641	XP_019531666.1	serine/threonine-protein phosphatase 4 catalytic subunit	gene35084	0	641
ort001825	XP_021706774.1	DNA-directed RNA polymerase I subunit RPA1	gene17444	0	3211	XP_019531673.1	DNA-directed RNA polymerase I subunit RPA1-like	gene4009	0	3199
ort001826	XP_021705502.1	ecdysone 20-monooxygenase%2C transcript variant X6	gene14107	0	1087	XP_019531674.1	ecdysone 20-monooxygenase-like%2C transcript variant X1	gene35077	0	1087
ort001827	XP_021705068.1	lachesin	gene14048	0	857	XP_019531679.1	lachesin-like	gene35131	0	857
ort001828	XP_001661201.1	protein OPI10 homolog	gene14112	6e-144	399	XP_019531682.1	protein OPI10 homolog	gene35074	4e-144	399
ort001829	XP_001648272.2	tRNA modification GTPase GTPBP3%2C mitochondrial%2C transcript variant X1	gene14060	0	916	XP_019531686.1	tRNA modification GTPase GTPBP3%2C mitochondrial-like	gene35121	0	916
ort001830	XP_021708610.1	uncharacterized LOC23687563	gene17559	8e-159	450	XP_019531692.1	uncharacterized LOC109403340	gene35169	8e-159	450
ort001831	XP_021708276.1	putative GPI-anchored protein pfl2%2C transcript variant X1	gene17557	0	2036	XP_019531694.1	proteoglycan 4-like	gene35171	0	2036
ort001832	XP_001657477.1	uncharacterized LOC5567472	gene17564	3e-148	411	XP_019531695.1	uncharacterized LOC109403343	gene35167	2e-148	411
ort001833	XP_001657458.1	RWD domain-containing protein 2A	gene17584	0	568	XP_019531697.1	RWD domain-containing protein 2A-like	gene35148	0	568
ort001834	XP_001657460.1	Bardet-Biedl syndrome 7 protein homolog	gene17582	0	1486	XP_019531699.1	Bardet-Biedl syndrome 7 protein homolog	gene35149	0	1486
ort001835	XP_021708538.1	transcription factor GAGA%2C transcript variant X6	gene17581	0	988	XP_019531705.1	transcription factor GAGA-like%2C transcript variant X2	gene35150	0	988
ort001836	XP_001663217.2	putative helicase MOV-10	gene3598	0	555	XP_019531709.1	putative helicase MOV-10	gene35141	0	560
ort001837	XP_021708467.1	uncharacterized LOC110678987	gene17571	0	2378	XP_019531713.1	uncharacterized LOC109403356	gene35162	0	2378
ort001838	XP_001657473.1	protein LTV1 homolog	gene17570	0	865	XP_019531714.1	protein LTV1 homolog	gene35161	0	866
ort001839	XP_001657464.1	calcium channel flower%2C transcript variant X1	gene17578	5e-151	418	XP_019531716.1	calcium channel flower-like%2C transcript variant X3	gene35153	4e-151	418
ort001840	XP_001657465.1	calcium channel flower%2C transcript variant X1	gene17578	7e-146	404	XP_019531717.1	calcium channel flower-like%2C transcript variant X3	gene35153	5e-146	404
ort001841	XP_021712824.1	testis-expressed protein 10 homolog	gene19458	0	1300	XP_019531719.1	testis-expressed sequence 10 protein homolog	gene35164	0	1300
ort001842	XP_021708481.1	transmembrane channel-like protein 7%2C transcript variant X5	gene17572	0	1853	XP_019531727.1	transmembrane channel-like protein 7%2C transcript variant X1	gene35159	0	1845
ort001843	XP_021708479.1	transmembrane channel-like protein 7%2C transcript variant X5	gene17572	0	1853	XP_019531729.1	transmembrane channel-like protein 7%2C transcript variant X1	gene35159	0	1845
ort001844	XP_001657481.2	tetraspanin-2A	gene17556	2e-179	493	XP_019531731.1	tetraspanin-2A-like	gene35172	1e-179	493
ort001845	XP_001657468.1	ER membrane protein complex subunit 4%2C transcript variant X1	gene17576	6e-124	346	XP_019531732.1	ER membrane protein complex subunit 4-like	gene35154	4e-124	346
ort001846	XP_021708499.1	uncharacterized LOC5567466	gene17575	1e-32	106	XP_019531737.1	uncharacterized LOC109403375	gene35156	9e-33	106
ort001847	XP_021706592.1	proclotting enzyme%2C transcript variant X1	gene15436	0	537	XP_019531740.1	clotting factor B	gene35205	0	634
ort001848	XP_001655729.2	tryptase	gene15465	0	602	XP_019531743.1	trypsin-1-like	gene35177	0	602
ort001849	XP_001655714.1	uncharacterized LOC5575336	gene15447	2e-66	196	XP_019531762.1	uncharacterized LOC109403391	gene35195	1e-66	196
ort001850	XP_021706472.1	tryptase	gene15438	0	774	XP_019531763.1	tryptase-like	gene35202	0	774
ort001851	XP_021704388.1	serine protease 42%2C transcript variant X3	gene15433	0	579	XP_019531764.1	keratin%2C type I cytoskeletal 9-like	gene35210	0	586
ort001852	XP_001655696.1	WW domain-binding protein 2	gene15431	0	583	XP_019531766.1	WW domain-binding protein 2	gene35214	0	583
ort001853	XP_021704362.1	equilibrative nucleoside transporter 4%2C transcript variant X1	gene15430	0	1177	XP_019531770.1	equilibrative nucleoside transporter 4	gene35212	0	1177
ort001854	XP_001655711.1	tryptase	gene15445	0	853	XP_019531774.1	tryptase-like%2C transcript variant X3	gene35196	0	853
ort001855	XP_001655704.2	serine protease 55	gene15437	2e-131	382	XP_019531776.1	serine protease 55-like	gene35203	2e-127	372
ort001856	XP_021712674.1	protein NPC2 homolog	gene19243	5e-103	292	XP_019531777.1	protein NPC2 homolog	gene4018	4e-103	292
ort001857	XP_021706988.1	transmembrane protease serine 2	gene15434	0	1018	XP_019531778.1	uncharacterized LOC109403406%2C transcript variant X1	gene35208	0	1007
ort001858	XP_001655715.1	uncharacterized LOC5575337	gene15449	1e-74	220	XP_019531781.1	uncharacterized LOC109403408	gene35193	1e-82	240
ort001859	XP_001655707.2	prestalk protein	gene15440	0	1309	XP_019531782.1	prestalk protein-like	gene35200	0	1312
ort001860	XP_001655709.1	serine proteinase stubble	gene15442	0	644	XP_019531783.1	tryptase beta-2-like	gene35198	0	644
ort001861	XP_021707411.1	uncharacterized LOC5575323%2C transcript variant X1	gene15432	5e-71	210	XP_019531784.1	uncharacterized LOC109403413	gene35211	4e-79	231
ort001862	XP_001655708.1	uncharacterized LOC5575331	gene15441	0	607	XP_019531786.1	uncharacterized LOC109403415	gene35199	0	607
ort001863	XP_001652288.1	transcription initiation factor TFIID subunit 8	gene17434	0	647	XP_019531787.1	transcription initiation factor TFIID subunit 8	gene4019	0	647
ort001864	XP_001655728.2	tryptase	gene15464	0	624	XP_019531788.1	tryptase-like	gene35180	0	613
ort001865	XP_021705429.1	uncharacterized LOC5575333	gene15444	0	983	XP_019531794.1	uncharacterized LOC109403421	gene35197	0	973
ort001866	XP_001655726.1	general odorant-binding protein 56d	gene15451	7e-98	277	XP_019531795.1	general odorant-binding protein 56d-like	gene35182	5e-98	277
ort001867	XP_021706036.1	mucin-5AC	gene15421	0	625	XP_019531796.1	uncharacterized LOC109403424	gene35222	0	647
ort001868	XP_021708065.1	peritrophin-48	gene15410	2e-115	337	XP_019531797.1	uncharacterized LOC109403425	gene35231	6e-114	333
ort001869	XP_001655683.2	chondroitin proteoglycan-2	gene15415	0	565	XP_019531800.1	uncharacterized LOC109403431	gene35228	0	565
ort001870	XP_021706772.1	tuberin%2C transcript variant X1	gene15398	0	3622	XP_019531804.1	tuberin-like%2C transcript variant X2	gene35243	0	3562
ort001871	XP_021708109.1	extensin%2C transcript variant X3	gene15429	0	996	XP_019531807.1	proline-rich extensin-like protein EPR1%2C transcript variant X2	gene35215	0	822
ort001872	XP_021704437.1	protein snakeskin%2C transcript variant X2	gene15408	1e-116	327	XP_019531811.1	protein snakeskin-like	gene35234	1e-116	327
ort001873	XP_021708110.1	SPRY domain-containing SOCS box protein 3%2C transcript variant X2	gene15426	0	707	XP_019531815.1	SPRY domain-containing SOCS box protein 3%2C transcript variant X4	gene35216	0	710
ort001874	XP_001652845.1	60S ribosomal protein L21%2C transcript variant X2	gene15391	7e-116	325	XP_019531823.1	60S ribosomal protein L21-like	gene35250	5e-116	325
ort001875	XP_021705470.1	calumenin%2C transcript variant X2	gene15389	0	639	XP_019531825.1	calumenin%2C transcript variant X1	gene35252	0	639
ort001876	XP_001652852.1	cAMP-regulated phosphoprotein 19%2C transcript variant X1	gene15403	6e-86	246	XP_019531827.1	alpha-endosulfine%2C transcript variant X1	gene35237	4e-86	246
ort001877	XP_021706661.1	cAMP-regulated phosphoprotein 19%2C transcript variant X1	gene15403	3e-85	244	XP_019531829.1	alpha-endosulfine%2C transcript variant X1	gene35237	2e-85	244
ort001878	XP_001652851.2	viral IAP-associated factor homolog	gene15401	1e-168	464	XP_019531830.1	viral IAP-associated factor homolog	gene35238	1e-168	464
ort001879	XP_021706106.1	ubiquitin carboxyl-terminal hydrolase 46	gene15392	0	750	XP_019531831.1	ubiquitin carboxyl-terminal hydrolase 46-like	gene35249	0	750
ort001880	XP_001655685.1	protein obstructor-E	gene15419	0	596	XP_019531835.1	probable chitinase 3	gene35225	0	585
ort001881	XP_011493626.2	uncharacterized LOC23687958	gene15417	0	548	XP_019531837.1	peritrophin-44-like	gene35227	0	538
ort001882	XP_001655688.2	probable chitinase 10	gene15423	4e-159	457	XP_019531839.1	chondroitin proteoglycan 1-like	gene35221	2e-144	419
ort001883	XP_001655681.2	probable chitinase 10	gene15412	3e-159	446	XP_019531840.1	probable chitinase 3	gene35230	8e-163	454
ort001884	XP_001655682.2	peritrophin-48	gene15414	0	573	XP_019531841.1	uncharacterized LOC109403464	gene35229	0	583
ort001885	XP_001652854.2	tubulin polyglutamylase complex subunit 2%2C transcript variant X1	gene15404	0	578	XP_019531843.1	tubulin polyglutamylase complex subunit 2-like	gene35236	0	578
ort001886	XP_021703123.1	uncharacterized LOC110677020	gene10593	7e-119	354	XP_019531846.1	uncharacterized LOC109403468	gene35259	5e-119	354
ort001887	XP_021705126.1	uncharacterized LOC5567511	gene15471	0	3053	XP_019531848.1	uncharacterized LOC109403474	gene35264	0	3053
ort001888	XP_001651798.1	39S ribosomal protein L12%2C mitochondrial	gene15472	2e-106	303	XP_019531850.1	54S ribosomal protein L12%2C mitochondrial-like	gene35266	8e-100	286
ort001889	XP_001653779.1	uncharacterized LOC5571752	gene14657	3e-66	196	XP_019531851.1	uncharacterized LOC109403478	gene35271	2e-66	196
ort001890	XP_021694756.1	uncharacterized LOC110674775	gene264	0	944	XP_019531857.1	uncharacterized LOC109403483	gene35277	0	993
ort001891	XP_021694750.1	echinoderm microtubule-associated protein-like CG42247%2C transcript variant X2	gene259	0	2538	XP_019531858.1	echinoderm microtubule-associated protein-like CG42247	gene35274	0	2538
ort001892	XP_001648190.1	complex I intermediate-associated protein 30%2C mitochondrial	gene256	0	602	XP_019531859.1	complex I intermediate-associated protein 30%2C mitochondrial-like	gene35272	0	602
ort001893	XP_001662669.2	uncharacterized LOC5576476	gene1575	0	753	XP_019531860.1	uncharacterized LOC109403488	gene35286	0	761
ort001894	XP_021695224.1	uncharacterized LOC110675151	gene7120	5e-68	216	XP_019531862.1	uncharacterized LOC109403491	gene35312	2e-68	216
ort001895	XP_021703681.1	putative nuclease HARBI1	gene1857	2e-180	504	XP_019531865.1	putative nuclease HARBI1%2C transcript variant X1	gene35316	0	510
ort001896	XP_001652284.1	major facilitator superfamily domain-containing protein 12%2C transcript variant X3	gene17429	0	1033	XP_019531872.1	major facilitator superfamily domain-containing protein 12-like%2C transcript variant X6	gene4024	0	1058
ort001897	XP_021700484.1	thioredoxin reductase 1%2C mitochondrial%2C transcript variant X2	gene1572	0	994	XP_019531874.1	thioredoxin reductase 1%2C mitochondrial-like%2C transcript variant X1	gene35282	0	994
ort001898	XP_001662671.2	uncharacterized LOC5576479	gene1577	3e-66	202	XP_019531884.1	uncharacterized LOC109403518	gene35289	2e-66	202
ort001899	XP_021700623.1	serine/threonine-protein kinase D1%2C transcript variant X4	gene1579	0	1695	XP_019531885.1	serine/threonine-protein kinase D1	gene35291	0	1695
ort001900	XP_021706467.1	major facilitator superfamily domain-containing protein 12%2C transcript variant X3	gene17429	0	1033	XP_019531887.1	major facilitator superfamily domain-containing protein 12-like%2C transcript variant X6	gene4024	0	1058
ort001901	XP_021700464.1	endoplasmic reticulum membrane-associated RNA degradation protein-like	gene1570	0	874	XP_019531889.1	endoplasmic reticulum membrane-associated RNA degradation protein-like	gene35280	0	874
ort001902	XP_021700479.1	B-cell CLL/lymphoma 7 protein family member B-B%2C transcript variant X2	gene1571	1e-81	240	XP_019531890.1	B-cell CLL/lymphoma 7 protein family member B-B-like%2C transcript variant X1	gene35281	3e-86	251
ort001903	XP_021708506.1	failed axon connections%2C transcript variant X1	gene17125	0	513	XP_019531891.1	failed axon connections-like	gene366	0	523
ort001904	XP_021700664.1	N-alpha-acetyltransferase 40	gene1583	5e-148	410	XP_019531893.1	N-alpha-acetyltransferase 40	gene35297	4e-148	410
ort001905	XP_021700737.1	5-hydroxytryptamine receptor 2B%2C transcript variant X13	gene1588	0	1281	XP_019531898.1	probable G-protein coupled receptor 176	gene35306	0	1259
ort001906	XP_001659308.2	farnesol dehydrogenase-like	gene1596	3e-152	424	XP_019531912.1	farnesol dehydrogenase-like	gene35337	2e-152	424
ort001907	XP_001659302.2	zinc finger protein SNAI2%2C transcript variant X1	gene1601	2e-157	446	XP_019531916.1	gastrula zinc finger protein XlCGF53.1-like	gene35342	2e-161	456
ort001908	XP_021701111.1	protein sidekick%2C transcript variant X1	gene1614	0	3619	XP_019531920.1	protein sidekick%2C transcript variant X1	gene35359	0	3619
ort001909	XP_021700817.1	transmembrane protein 47%2C transcript variant X8	gene1597	0	531	XP_019531924.1	transmembrane protein 47-like%2C transcript variant X1	gene35338	0	531
ort001910	XP_021706359.1	sorting nexin-17%2C transcript variant X6	gene17427	0	996	XP_019531925.1	sorting nexin-17	gene4027	0	996
ort001911	XP_001653699.2	meiosis-specific nuclear structural protein 1	gene1622	0	813	XP_019531927.1	meiosis-specific nuclear structural protein 1-like	gene35363	0	842
ort001912	XP_021701052.1	lysophosphatidylcholine acyltransferase%2C transcript variant X4	gene1609	0	858	XP_019531930.1	lysophosphatidylcholine acyltransferase-like%2C transcript variant X2	gene35354	0	858
ort001913	XP_021700978.1	O-acyltransferase like protein	gene1606	0	1574	XP_019531932.1	O-acyltransferase like protein-like	gene35351	0	1574
ort001914	XP_001659296.2	EP300-interacting inhibitor of differentiation 3	gene1607	0	587	XP_019531933.1	EP300-interacting inhibitor of differentiation 3-like	gene35352	0	587
ort001915	XP_021700943.1	MAP kinase-activating death domain protein%2C transcript variant X2	gene1604	0	4050	XP_019531936.1	MAP kinase-activating death domain protein-like	gene35350	0	4050
ort001916	XP_021706780.1	target of rapamycin complex 1 subunit mip1	gene17425	0	1165	XP_019531937.1	target of rapamycin complex 1 subunit mip1-like	gene4028	0	1214
ort001917	XP_021700880.1	poly(ADP-ribose) glycohydrolase	gene1602	0	1310	XP_019531938.1	poly(ADP-ribose) glycohydrolase-like	gene35346	0	1295
ort001918	XP_021701068.1	lysoplasmalogenase-like protein TMEM86A%2C transcript variant X5	gene1611	2e-172	476	XP_019531940.1	lysoplasmalogenase-like protein TMEM86A%2C transcript variant X3	gene35356	1e-172	476
ort001919	XP_021701080.1	lysoplasmalogenase-like protein TMEM86A%2C transcript variant X5	gene1611	4e-164	454	XP_019531941.1	lysoplasmalogenase-like protein TMEM86A%2C transcript variant X3	gene35356	3e-164	454
ort001920	XP_001659292.1	protein deltex%2C transcript variant X1	gene1612	0	1206	XP_019531942.1	protein deltex	gene35357	0	1181
ort001921	XP_021706295.1	zinc finger protein 675%2C transcript variant X1	gene17422	0	804	XP_019531949.1	zinc finger protein 250-like	gene4029	0	794
ort001922	XP_021707698.1	protein gooseberry	gene15814	0	931	XP_019531951.1	protein gooseberry-like	gene35369	0	931
ort001923	XP_021693409.1	cystinosin homolog%2C transcript variant X10	gene3722	0	783	XP_019531957.1	cystinosin homolog%2C transcript variant X3	gene35373	0	783
ort001924	XP_021706283.1	uncharacterized LOC5568443	gene17420	0	902	XP_019531958.1	uncharacterized LOC109403588	gene4030	0	902
ort001925	XP_021693418.1	uncharacterized LOC5567509	gene3724	0	3720	XP_019531960.1	uncharacterized LOC109403594%2C transcript variant X2	gene35371	0	3726
ort001926	XP_021693405.1	G protein-coupled receptor kinase 2%2C transcript variant X4	gene3721	0	943	XP_019531964.1	G protein-coupled receptor kinase 2	gene35378	0	943
ort001927	XP_021693390.1	uncharacterized LOC5573637%2C transcript variant X1	gene3710	0	770	XP_019531969.1	uncharacterized LOC109403603	gene35389	0	782
ort001928	XP_001650805.1	uncharacterized LOC5566413	gene3712	0	536	XP_019531970.1	uncharacterized LOC109403605	gene35383	0	536
ort001929	XP_021693403.1	lysyl oxidase homolog 2B	gene3720	0	968	XP_019531977.1	lysyl oxidase homolog 2B-like	gene35379	0	993
ort001930	XP_021693392.1	neuropeptide F receptor%2C transcript variant X3	gene3711	0	819	XP_019531981.1	neuropeptide F receptor-like	gene35384	0	819
ort001931	XP_021697595.1	ATP-dependent DNA helicase Q4	gene6063	0	2576	XP_019531984.1	ATP-dependent DNA helicase Q4	gene35400	0	2608
ort001932	XP_021701647.1	uncharacterized LOC110676787	gene1662	1e-143	414	XP_019531985.1	uncharacterized LOC109403619	gene35404	5e-144	414
ort001933	XP_001655655.1	ARL14 effector protein	gene6034	3e-114	322	XP_019531990.1	ARL14 effector protein-like	gene35433	7e-108	305
ort001934	XP_001650031.2	uncharacterized LOC5565674	gene6107	0	742	XP_019531993.1	uncharacterized LOC109403628	gene35452	0	742
ort001935	XP_001650364.1	uncharacterized LOC5565996	gene6046	2e-141	397	XP_019531994.1	RING finger protein vilya-like	gene35415	8e-148	412
ort001936	XP_021703512.1	uncharacterized LOC5565470	gene10984	2e-82	253	XP_019531997.1	uncharacterized LOC109403636	gene35403	1e-77	241
ort001937	XP_021697579.1	serine/threonine-protein phosphatase 4 regulatory subunit 1%2C transcript variant X1	gene6047	0	2412	XP_019531998.1	serine/threonine-protein phosphatase 4 regulatory subunit 1-like%2C transcript variant X1	gene35412	0	2396
ort001938	XP_021697630.1	uncharacterized LOC5572757%2C transcript variant X1	gene6102	0	896	XP_019532002.1	uncharacterized LOC109403642	gene35448	0	923
ort001939	XP_021697593.1	importin subunit alpha-6	gene6060	0	1051	XP_019532007.1	importin subunit alpha-6-like	gene35406	0	1051
ort001940	XP_001660585.2	WD repeat-containing protein 89	gene6115	0	733	XP_019532008.1	WD repeat-containing protein 89	gene35461	0	733
ort001941	XP_021697643.1	calcium and integrin-binding family member 2	gene6116	2e-127	356	XP_019532010.1	calcium and integrin-binding protein 1-like%2C transcript variant X2	gene35462	1e-127	356
ort001942	XP_001655645.1	DNA-directed RNA polymerase III subunit RPC5%2C transcript variant X2	gene6022	0	923	XP_019532012.1	DNA-directed RNA polymerase III subunit RPC5-like%2C transcript variant X1	gene35443	0	923
ort001943	XP_001656285.1	histone chaperone asf1%2C transcript variant X1	gene6021	8e-160	441	XP_019532014.1	histone chaperone asf1	gene35445	6e-160	441
ort001944	XP_021697537.1	histone chaperone asf1%2C transcript variant X1	gene6021	8e-116	327	XP_019532016.1	cancer-related nucleoside-triphosphatase-like	gene35444	6e-116	327
ort001945	XP_001655652.1	nascent polypeptide-associated complex subunit alpha	gene6030	2e-157	435	XP_019532023.1	nascent polypeptide-associated complex subunit alpha	gene35435	1e-157	435
ort001946	XP_021697566.1	myosin light chain kinase 2%2C skeletal/cardiac muscle%2C transcript variant X4	gene6041	0	696	XP_019532034.1	myosin light chain kinase 2%2C skeletal/cardiac muscle	gene35423	0	696
ort001947	XP_021697573.1	serine/arginine repetitive matrix protein 1-like%2C transcript variant X11	gene6045	0	631	XP_019532038.1	microtubule-associated protein futsch%2C transcript variant X4	gene35421	0	649
ort001948	XP_001661139.1	SWI/SNF-related matrix-associated actin-dependent regulator of chromatin subfamily E member 1	gene6061	0	691	XP_019532040.1	SWI/SNF-related matrix-associated actin-dependent regulator of chromatin subfamily E member 1	gene35405	0	906
ort001949	XP_001656284.1	cytochrome b561%2C transcript variant X3	gene6019	3e-175	482	XP_019532043.1	cytochrome b561-like%2C transcript variant X2	gene35447	2e-175	482
ort001950	XP_021697636.1	uncharacterized LOC110675918	gene6114	0	1251	XP_019532044.1	uncharacterized LOC109403670	gene35459	0	1251
ort001951	XP_001661137.1	coiled-coil domain-containing protein 58	gene6058	5e-98	278	XP_019532052.1	coiled-coil domain-containing protein 58	gene35407	3e-98	278
ort001952	XP_001655654.1	RYamide neuropeptides	gene6032	4e-98	279	XP_019532060.1	uncharacterized LOC109403684%2C transcript variant X2	gene35434	3e-98	279
ort001953	XP_021697552.1	protein RRNAD1-like	gene6035	0	658	XP_019532061.1	protein RRNAD1-like	gene35432	0	658
ort001954	XP_021700060.1	uncharacterized LOC5564083%2C transcript variant X2	gene7985	0	611	XP_019532063.1	uncharacterized LOC109403689%2C transcript variant X1	gene35466	0	611
ort001955	XP_021700055.1	uncharacterized LOC5564083%2C transcript variant X2	gene7985	0	1178	XP_019532066.1	uncharacterized LOC109403689%2C transcript variant X1	gene35466	0	1159
ort001956	XP_021706263.1	muscle LIM protein 1%2C transcript variant X8	gene17418	2e-64	190	XP_019532075.1	muscle LIM protein 1%2C transcript variant X15	gene4033	1e-64	190
ort001957	XP_021700036.1	potassium/sodium hyperpolarization-activated cyclic nucleotide-gated channel 2%2C transcript variant X2	gene7980	0	1534	XP_019532084.1	potassium/sodium hyperpolarization-activated cyclic nucleotide-gated channel 2%2C transcript variant X8	gene35475	0	1534
ort001958	XP_021710996.1	regulating synaptic membrane exocytosis protein 1%2C transcript variant X2	gene14036	0	2313	XP_019532107.1	regulating synaptic membrane exocytosis protein 2-like%2C transcript variant X10	gene35491	0	2313
ort001959	XP_001656965.1	uncharacterized LOC5578444	gene14039	0	1286	XP_019532117.1	uncharacterized LOC109403713%2C transcript variant X2	gene35489	0	1307
ort001960	XP_001656966.1	U6 snRNA-associated Sm-like protein LSm1	gene14038	1e-93	268	XP_019532124.1	U6 snRNA-associated Sm-like protein LSm1	gene35485	6e-94	268
ort001961	XP_001661818.2	helicase POLQ-like%2C transcript variant X2	gene17411	0	1847	XP_019532125.1	helicase POLQ-like	gene4040	0	1867
ort001962	XP_021707035.1	uncharacterized LOC110678441	gene14028	2e-154	429	XP_019532126.1	uncharacterized LOC109403724	gene35497	8e-155	430
ort001963	XP_021710260.1	protein couch potato%2C transcript variant X6	gene14034	7e-120	340	XP_019532138.1	protein couch potato-like%2C transcript variant X5	gene35492	3e-115	328
ort001964	XP_001656981.1	T-complex protein 1 subunit eta	gene14020	0	1115	XP_019532139.1	T-complex protein 1 subunit eta-like	gene35505	0	1115
ort001965	XP_021695977.1	uncharacterized LOC110675391	gene6894	7e-23	94.4	XP_019532140.1	uncharacterized LOC109403730	gene35506	4e-21	89.4
ort001966	XP_021707033.1	interleukin-1 receptor accessory protein-like 1%2C transcript variant X3	gene14030	0	676	XP_019532143.1	fibroblast growth factor receptor 4-like%2C transcript variant X2	gene35495	0	676
ort001967	XP_021707028.1	acetylcholinesterase%2C transcript variant X8	gene14026	0	1409	XP_019532147.1	acetylcholinesterase%2C transcript variant X2	gene35498	0	1409
ort001968	XP_001656979.1	beta-catenin-like protein 1	gene14023	0	1111	XP_019532149.1	beta-catenin-like protein 1	gene35502	0	1111
ort001969	XP_001656971.1	SPRY domain-containing protein 7	gene14033	5e-159	439	XP_019532150.1	SPRY domain-containing protein 7-like	gene35493	3e-159	439
ort001970	XP_001652213.1	sodium- and chloride-dependent transporter XTRP3B%2C transcript variant X2	gene17387	0	1656	XP_019532152.1	uncharacterized LOC109403726%2C transcript variant X2	gene4041	0	1679
ort001971	XP_001656976.1	uncharacterized LOC5578455	gene14029	7e-163	452	XP_019532154.1	uncharacterized LOC109403738	gene35496	5e-163	452
ort001972	XP_001647991.1	hydroxylysine kinase	gene3565	0	765	XP_019532155.1	hydroxylysine kinase-like	gene35509	0	765
ort001973	XP_021700032.1	sushi%2C von Willebrand factor type A%2C EGF and pentraxin domain-containing protein 1%2C transcript variant X1	gene7979	0	7170	XP_019532161.1	sushi%2C von Willebrand factor type A%2C EGF and pentraxin domain-containing protein 1-like	gene35511	0	7170
ort001974	XP_001661295.2	pancreatic lipase-related protein 2	gene6636	2e-177	495	XP_019532170.1	pancreatic lipase-related protein 2-like	gene35529	2e-177	495
ort001975	XP_001648564.1	CDGSH iron-sulfur domain-containing protein 3%2C mitochondrial	gene6657	8e-89	254	XP_019532174.1	CDGSH iron-sulfur domain-containing protein 3%2C mitochondrial	gene35544	6e-89	254
ort001976	XP_021698326.1	GATA zinc finger domain-containing protein 10	gene6635	2e-65	197	XP_019532175.1	peritrophin-1-like	gene35528	2e-59	182
ort001977	XP_001661294.1	microfibril-associated glycoprotein 4	gene6634	0	635	XP_019532176.1	microfibril-associated glycoprotein 4-like	gene35526	0	624
ort001978	XP_001648575.1	venom allergen 5	gene6641	8e-159	442	XP_019532179.1	venom allergen 3-like	gene35535	6e-152	424
ort001979	XP_021698342.1	ribose-phosphate pyrophosphokinase 1%2C transcript variant X4	gene6651	0	752	XP_019532184.1	ribose-phosphate pyrophosphokinase 1%2C transcript variant X3	gene35539	0	752
ort001980	XP_001648569.1	ubiquitin-conjugating enzyme E2-22 kDa	gene6652	4e-151	417	XP_019532186.1	ubiquitin-conjugating enzyme E2-22 kDa-like	gene35540	3e-151	417
ort001981	XP_001648568.2	uncharacterized protein KIAA1841 homolog	gene6653	0	1469	XP_019532187.1	uncharacterized protein KIAA1841 homolog	gene35541	0	1469
ort001982	XP_001648651.1	probable trafficking protein particle complex subunit 13 homolog	gene6666	0	852	XP_019532193.1	probable trafficking protein particle complex subunit 13 homolog	gene35552	0	852
ort001983	XP_021698345.1	microtubule-associated protein RP/EB family member 1%2C transcript variant X2	gene6655	0	506	XP_019532204.1	microtubule-associated protein RP/EB family member 1%2C transcript variant X4	gene35543	0	506
ort001984	XP_021698325.1	uncharacterized LOC5564242	gene6632	0	788	XP_019532213.1	uncharacterized LOC109403779	gene35517	0	788
ort001985	XP_001648653.1	26S proteasome non-ATPase regulatory subunit 4	gene6664	0	754	XP_019532220.1	26S proteasome non-ATPase regulatory subunit 4	gene35550	0	754
ort001986	XP_001648652.1	microspherule protein 1	gene6665	0	856	XP_019532223.1	microspherule protein 1	gene35551	0	865
ort001987	XP_021698377.1	uncharacterized LOC5568837%2C transcript variant X4	gene6672	0	933	XP_019532227.1	uncharacterized LOC109403785%2C transcript variant X6	gene35558	0	933
ort001988	XP_001658203.1	uncharacterized LOC5568837%2C transcript variant X4	gene6672	0	894	XP_019532228.1	uncharacterized LOC109403785%2C transcript variant X6	gene35558	0	894
ort001989	XP_001648560.2	zinc finger protein 784	gene6660	0	603	XP_019532232.1	zinc finger protein 628-like	gene35547	0	610
ort001990	XP_001648559.2	protein prune homolog 2	gene6661	0	970	XP_019532239.1	uncharacterized LOC109403792	gene35548	0	971
ort001991	XP_021698358.1	zinc finger protein 43%2C transcript variant X1	gene6659	1e-142	405	XP_019532241.1	zinc finger protein 883-like	gene35546	1e-142	405
ort001992	XP_021698328.1	cysteinyl leukotriene receptor 1	gene6638	0	943	XP_019532244.1	growth hormone secretagogue receptor type 1-like	gene35532	0	943
ort001993	XP_021698400.1	death-inducer obliterator 1	gene6681	0	2042	XP_019532246.1	death-inducer obliterator 1-like	gene35567	0	2878
ort001994	XP_021698405.1	tumor protein D54%2C transcript variant X1	gene6685	0	748	XP_019532252.1	tumor protein D54%2C transcript variant X2	gene35572	0	748
ort001995	XP_021698404.1	tumor protein D54%2C transcript variant X1	gene6685	0	695	XP_019532253.1	tumor protein D54%2C transcript variant X2	gene35572	0	695
ort001996	XP_001652606.1	tumor protein D54%2C transcript variant X1	gene6685	3e-151	419	XP_019532255.1	tumor protein D54%2C transcript variant X2	gene35572	2e-151	419
ort001997	XP_021698384.1	uncharacterized LOC5568876	gene6677	0	507	XP_019532256.1	uncharacterized LOC109403809	gene35564	0	507
ort001998	XP_001652605.1	V-type proton ATPase subunit G	gene6684	2e-81	234	XP_019532257.1	V-type proton ATPase subunit G-like	gene35571	2e-81	234
ort001999	XP_021698385.1	protein N-terminal glutamine amidohydrolase%2C transcript variant X4	gene6678	4e-161	443	XP_019532258.1	protein N-terminal glutamine amidohydrolase	gene35565	3e-161	443
[truncated: 9,688 more rows]
